# Supplementary material for: Construction of dibenzo-fused seven- to nine-membered carbocycles via Brønsted acid-promoted intramolecular Friedel–Crafts-type alkenylation
Source: Royal Society of Chemistry journal article supplement (doi:10.1039/c5cc01257k), 2015-01-01

## Supplementary Information

### Construction of dibenzo-fused seven- to nine-membered carbocycles via Brønsted acid promoted intramolecular Friedel–Crafts type alkenylation

Takashi Otani,<sup>\*a</sup> Kanako Ueki,<sup>b</sup> Kinryo Cho,<sup>b</sup> Kan Kanai,<sup>b</sup>  
Kotaro Tateno<sup>b</sup> and Takao Saito<sup>\*ab</sup>

<sup>a</sup> Research Center for Chirality, Research Institute for Science & Technology, Tokyo University of Science, Kagurazaka, Shinjuku, Tokyo 162-8601, Japan.

<sup>b</sup> Department of Chemistry, Faculty of Science, Tokyo University of Science, Kagurazaka, Shinjuku, Tokyo 162-8601, Japan.

E-mail: totani@rs.tus.ac.jp (T.O.)

E-mail: tsaito@rs.kagu.tus.ac.jp (T.S.)

(Submitted to *Chem. Commun.*)

#### Contents

|                                                                                                                     |               |
|---------------------------------------------------------------------------------------------------------------------|---------------|
| 1. Synthesis                                                                                                        | • • • • • S 2 |
| 1.1. General information                                                                                            | • • • • • S2  |
| 1.2. Synthesis of <i>o</i> -alkynyl(arylalkyl)benzenes <b>8</b>                                                     | • • • • • S2  |
| 1.3. Synthesis of <i>o</i> -alkynyl(arylalkyl)benzenes <b>7</b>                                                     | • • • • • S8  |
| 1.4. Synthesis of <i>o</i> -alkynyl(arylalkyl)benzenes <b>9</b>                                                     | • • • • • S11 |
| 1.5. Synthesis of alkylidenedibenzo[ <i>a,d</i> ]cycloheptenes <b>1</b> , -octenes <b>2</b> , and -nonenes <b>3</b> | • • • • • S14 |
| 1.6. Preparation of 5,6,7,8-tetrahydro-13 <i>H</i> -dibenzo[ <i>a,d</i> ][9]annulen-13-one ( <b>6</b> )             | • • • • • S23 |
| 2. NMR spectra                                                                                                      | • • • • • S24 |

# 1. Synthesis

## 1.1. General information

All melting points were determined on a Yanaco melting point apparatus and are uncorrected. Infrared spectra were recorded on a Horiba FT-710 model spectrophotometer.  $^1\text{H}$  and  $^{13}\text{C}$  NMR spectral data were recorded at 25 °C unless otherwise noted, on one of the following instruments: Bruker Avance-600, Bruker Avance DPX-400, JEOL JNM-LA 500, or JEOL JNM-AL 300.  $^1\text{H}$  NMR data are reported as follows: chemical shift, multiplicity (s = singlet, d = doublet, t = triplet, q = quartet, quint = quintet, sext = sextet, sept = septet, m = multiplet, br = broad, app = apparent), coupling constant ( $J$ ) in Hertz (Hz), and integration. Chemical shifts ( $\delta$ ) are reported in ppm downfield from tetramethylsilane (TMS,  $\delta = 0$  for  $^1\text{H}$  NMR) or  $\text{CDCl}_3$  ( $\delta = 77.0$ , center line, for  $^{13}\text{C}$  NMR). HRMS analysis were performed on Bruker Daltonics microTOF or JEOL JMS-700.

## 1.2. Synthesis of o-alkynyl(arylalkyl)benzenes 8

### 1.2.1. Synthesis of 8a (typical synthetic procedure for 8a and 8i-l).

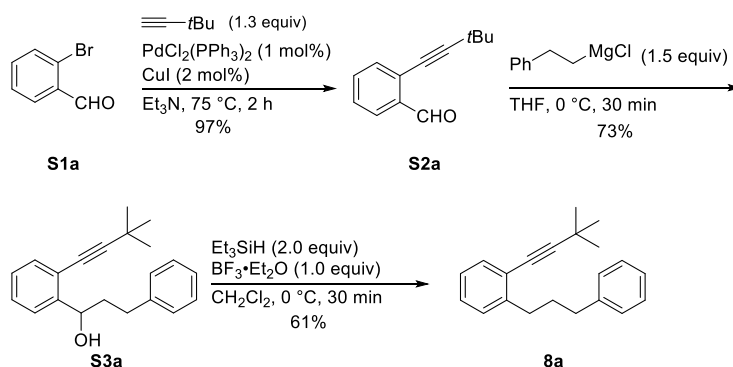

**Scheme S1.** Preparation of 1-(3,3-dimethylbut-1-yn-1-yl)-2-(3-phenylpropyl)benzene (**8a**).

To a mixture of  $\text{PdCl}_2(\text{PPh}_3)_2$  (71.0 mg, 101  $\mu\text{mol}$ , 1 mol%), CuI (40.1 mg, 211  $\mu\text{mol}$ , 2 mol%), 2-bromobenzaldehyde (**S1a**) (1.20 mL, 10.0 mmol), and triethylamine (50 mL) at room temperature was added 3,3-dimethyl-1-butyne (1.60 mL, 13.0 mmol). The mixture was then heated at 75 °C for 2 h, cooled to room temperature, and the solvent was removed under reduced pressure. The residue was purified by silica gel column chromatography using ethyl acetate/hexane = 1/50 to give 2-(3,3-dimethylbut-1-yn-1-yl)benzaldehyde (**S2a**)<sup>1</sup> as a yellow liquid (1.80 g, 9.66 mmol, 97%).

To a solution of **S2a** (192 mg, 1.0 mmol) in THF (1.0 mL) at 0 °C was added 1.0 M THF solution of benzylmagnesium chloride (1.50 mL, 1.50 mmol). The mixture was stirred for 30 min at 0 °C, quenched with saturated aqueous  $\text{NH}_4\text{Cl}$ , and then extracted with ethyl acetate ( $3 \times 10$  mL). The combined organic layers were washed with brine, dried over  $\text{Na}_2\text{SO}_4$ , and evaporated. The residue was purified by silica gel column chromatography using ethyl acetate/hexane = 1/16 as an eluent to give 1-(2-(3,3-dimethylbut-1-yn-1-yl)phenyl)-3-phenylpropan-1-ol (**S3a**) as a colorless liquid (213 mg, 730  $\mu\text{mol}$ , 73%):  $^1\text{H}$  NMR (500 MHz,  $\text{CDCl}_3$ )  $\delta$  1.31 (s, 9H, Me (*t*-Bu)), 2.00–2.18 (m, 2H,  $\text{CH}_2$ ), 2.26 (d,  $J = 4.5$  Hz,

<sup>1</sup> A. S. K. Hashmi, M. Bührle, R. Salathé and J. W. Bats, *Adv. Synth. Catal.*, 2008, **350**, 2059.

1H, OH), 2.64–2.79 (m, 1H, CH<sub>2</sub>), 2.79–2.94 (m, 1H, CH<sub>2</sub>), 5.12 (td, *J* = 5.0, 7.6 Hz, 1H, CHOH), 7.15–7.31 (m, 7H, Ar), 7.36 (dd, *J* = 1.1, 7.7 Hz, 1H, Ar), 7.44 (d, *J* = 7.7 Hz, 1H, Ar); <sup>13</sup>C NMR (125 MHz, CDCl<sub>3</sub>) δ 28.1 (C), 30.9 (3CH<sub>3</sub>), 32.4 (CH<sub>2</sub>), 39.4 (CH<sub>2</sub>), 72.0 (CH), 76.9 (C), 103.6 (C), 121.1 (C), 125.2 (CH), 125.7 (CH), 126.8 (CH), 127.9 (CH), 128.3 (2CH), 128.3 (2CH), 132.1 (CH), 142.0 (C), 146.1 (C); HRMS-ESI *m/z* [M+Na]<sup>+</sup> calcd for C<sub>21</sub>H<sub>24</sub>NaO: 315.1719, found: 315.1717.

### 1-(3,3-Dimethylbut-1-yn-1-yl)-2-(3-phenylpropyl)benzene (8a).

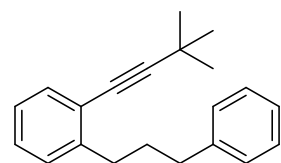

To a CH<sub>2</sub>Cl<sub>2</sub> solution (3 mL) of 1-(2-(3,3-dimethylbut-1-yn-1-yl)phenyl)-3-phenylpropan-1-ol (**S3a**) (112 mg, 0.38 mmol) at 0 °C were added triethylsilane (110 μL, 0.76 mmol) and boron trifluoride etherate (50 μL, 0.35 mmol). The mixture was then stirred at 0 °C for 30 min, quenched with saturated aqueous NaHCO<sub>3</sub>, and then extracted with ethyl acetate (2 × 3 mL). The combined organic layers were washed with brine and dried over Na<sub>2</sub>SO<sub>4</sub>. The solvent was removed under reduced pressure and the residue was purified by silica gel column chromatography using hexane as an eluent to give 1-(3,3-dimethylbut-1-yn-1-yl)-2-(3-phenylpropyl)benzene (**8a**) as a colorless liquid (64.4 mg, 0.23 mmol, 61%): <sup>1</sup>H NMR (300 MHz, CDCl<sub>3</sub>) δ 1.32 (s, 9H, Me (*t*-Bu)), 1.90–2.05 (m, 2H, CH<sub>2</sub>), 2.68 (t, *J* = 7.8 Hz, 2H, CH<sub>2</sub>), 2.80 (t, *J* = 7.8 Hz, 2H, CH<sub>2</sub>), 7.10–7.32 (m, 8H, Ar), 7.35 (d, *J* = 7.3 Hz, 1H, Ar); <sup>13</sup>C NMR (75.5 MHz, CDCl<sub>3</sub>) δ 28.1 (C), 31.1 (3CH<sub>3</sub>), 32.1 (CH<sub>2</sub>), 34.5 (CH<sub>2</sub>), 35.9 (CH<sub>2</sub>), 77.7 (C), 102.1 (C), 123.3 (C), 125.6 (CH), 125.7 (CH), 127.5 (CH), 128.3 (2CH), 128.4 (2CH), 128.6 (CH), 132.0 (CH), 142.4 (C), 144.1 (C); HRMS-ESI *m/z* [M+Na]<sup>+</sup> calcd for C<sub>21</sub>H<sub>24</sub>Na: 299.1770, found: 299.1771.

### 1.2.2. 2-(3,3-Dimethylbut-1-yn-1-yl)-4-methoxy-1-(3-phenylpropyl)benzene (8i).

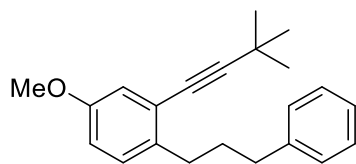

The title compound was synthesized using the same procedure described above. Colorless liquid: <sup>1</sup>H NMR (600 MHz, CDCl<sub>3</sub>) δ 1.32 (s, 9H, Me (*t*-Bu)), 1.93 (quint, *J* = 8.3 Hz, 2H, CH<sub>2</sub>), 2.66 (t, *J* = 7.7 Hz, 2H, CH<sub>2</sub>), 2.74 (t, *J* = 7.7 Hz, 2H, CH<sub>2</sub>), 3.77 (s, 3H, OMe), 6.75 (dd, *J* = 2.8, 8.5 Hz, 1H, Ar), 6.89 (d, *J* = 2.7 Hz, 1H, Ar), 7.05 (d, *J* = 8.4 Hz, 1H, Ar), 7.16 (d, *J* = 7.4 Hz, 1H, Ar), 7.19 (d, *J* = 7.3 Hz, 2H, Ar), 7.26 (s, 1H, Ar), 7.28 (d, *J* = 7.0 Hz, 1H, Ar); <sup>13</sup>C NMR (150 MHz, CDCl<sub>3</sub>) δ 28.1 (C), 31.1 (3CH<sub>3</sub>), 32.4 (CH<sub>2</sub>), 33.6 (CH<sub>2</sub>), 35.9 (CH<sub>2</sub>), 55.3 (CH<sub>3</sub>), 77.8 (C), 101.9 (C), 114.3 (CH), 116.3 (CH), 124.0 (C), 125.6 (CH), 128.3 (2CH), 128.4 (2CH), 129.6 (CH), 136.5 (C), 142.5 (C), 157.3 (C); HRMS-EI *m/z* [M]<sup>+</sup> calcd for C<sub>22</sub>H<sub>26</sub>O: 306.1984, found: 306.1985.

### 1.2.3. 1-(3,3-Dimethylbut-1-yn-1-yl)-2-(3-(4-methoxyphenyl)propyl)benzene (8j).

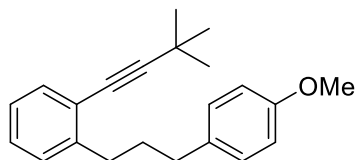

The title compound was synthesized using the same procedure described above. Colorless liquid: <sup>1</sup>H NMR (600 MHz, CDCl<sub>3</sub>) δ 1.32 (s, 9H, Me (*t*-Bu)), 1.93 (quint, *J* = 7.7 Hz, 2H, CH<sub>2</sub>), 2.62 (t, *J* = 7.7 Hz, 2H, CH<sub>2</sub>), 2.78 (t, *J* = 7.7 Hz, 2H, CH<sub>2</sub>), 3.78 (s, 3H, OMe), 6.82 (d, *J* = 8.1 Hz, 2H, Ar), 7.06–7.20 (m, 5H, Ar), 7.35 (d, *J* = 7.7 Hz, 1H, Ar); <sup>13</sup>C NMR (150 MHz, CDCl<sub>3</sub>) δ 28.2 (C), 31.1 (3CH<sub>3</sub>), 32.4 (CH<sub>2</sub>), 34.5 (CH<sub>2</sub>), 35.0 (CH<sub>2</sub>), 55.3 (CH<sub>3</sub>), 77.7 (C), 102.1 (C), 113.7 (2CH), 123.3 (C), 125.6 (CH), 127.5 (CH), 128.6 (CH), 129.3 (2CH), 132.0 (CH), 134.6 (C), 144.2 (C), 157.7 (C); HRMS-EI *m/z* [M]<sup>+</sup> calcd for C<sub>22</sub>H<sub>26</sub>O: 306.1984, found: 306.1984.

#### 1.2.4. 2-(3,3-Dimethylbut-1-yn-1-yl)-4-methyl-1-(3-phenylpropyl)benzene (8k).

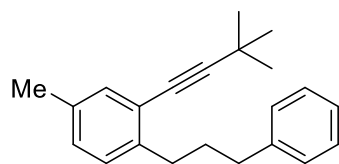

The title compound was synthesized using the same procedure described above.

Colorless liquid:  $^1\text{H}$  NMR (600 MHz,  $\text{CDCl}_3$ )  $\delta$  1.31 (s, 9H, Me (*t*-Bu)), 1.91–2.01 (m, 2H,  $\text{CH}_2$ ), 2.26 (s, 3H,  $\text{CH}_3$  (*p*-tol)), 2.67 (t,  $J = 8.0$  Hz, 2H,  $\text{CH}_2$ ), 2.76 (t,  $J = 8.0$  Hz, 2H,  $\text{CH}_2$ ), 6.95–7.07 (m, 2H, Ar), 7.13–7.22 (m, 4H, Ar), 7.24–7.29 (m, 2H, Ar);  $^{13}\text{C}$  NMR (150 MHz,  $\text{CDCl}_3$ )  $\delta$  20.7 ( $\text{CH}_3$ ), 28.1 (C), 31.1 (3 $\text{CH}_3$ ), 32.3 ( $\text{CH}_2$ ), 34.1 ( $\text{CH}_2$ ), 35.9 ( $\text{CH}_2$ ), 77.8 (C), 101.7 (C), 123.1 (C), 126.6 (CH), 128.2 (2CH), 128.4 (CH), 128.4 (2CH), 128.5 (CH), 132.5 (CH), 135.0 (C), 141.0 (C), 142.5 (C); HRMS-EI  $m/z$  [ $\text{M}$ ] $^+$  calcd for  $\text{C}_{22}\text{H}_{26}$ : 290.2035, found: 290.2038.

#### 1.2.5. 1-(3,3-Dimethylbut-1-yn-1-yl)-2-(3-(*p*-tolyl)propyl)benzene (8l).

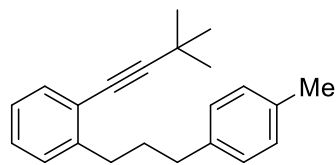

The title compound was synthesized using the same procedure described above.

Colorless liquid:  $^1\text{H}$  NMR (600 MHz,  $\text{CDCl}_3$ )  $\delta$  1.31 (s, 9H, Me (*t*-Bu)), 1.94 (quint,  $J = 7.8$  Hz, 2H,  $\text{CH}_2$ ), 2.30 (s, 3H,  $\text{CH}_3$  (*p*-tol)), 2.64 (t,  $J = 7.8$  Hz, 2H,  $\text{CH}_2$ ), 2.79 (t,  $J = 7.8$  Hz, 2H,  $\text{CH}_2$ ), 7.05–7.11 (m, 5H, Ar), 7.11–7.18 (m, 2H, Ar), 7.35 (d,  $J = 7.7$  Hz, 1H, Ar);  $^{13}\text{C}$  NMR (150 MHz,  $\text{CDCl}_3$ )  $\delta$  21.0 ( $\text{CH}_3$ ), 28.1 (C), 31.1 (3 $\text{CH}_3$ ), 32.3 ( $\text{CH}_2$ ), 34.5 ( $\text{CH}_2$ ), 35.5 ( $\text{CH}_2$ ), 77.7 (C), 102.1 (C), 123.3 (C), 125.6 (CH), 127.5 (CH), 128.3 (2CH), 128.6 (CH), 129.0 (2CH), 131.9 (CH), 135.0 (C), 139.3 (C), 144.2 (C); HRMS-EI  $m/z$  [ $\text{M}$ ] $^+$  calcd for  $\text{C}_{22}\text{H}_{26}$ : 290.2035, found: 290.2036.

#### 1.2.6. Synthesis of 4-(2-(3-phenylpropyl)phenyl)but-3-yn-1-ol (8g) (typical synthetic procedure for 8g and 8b-e).

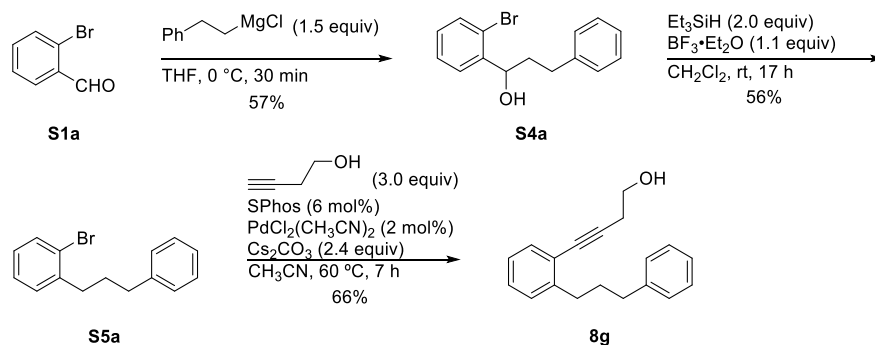

**Scheme S2.** Preparation of 4-(2-(3-phenylpropyl)phenyl)but-3-yn-1-ol (8g).

To a mixture of 2-bromobenzaldehyde (**S1a**) (2.30 mL, 20.0 mmol) in THF (150 mL) at 0 °C was added 1.0 M THF solution of benzylmagnesium chloride (30.0 mL, 30.0 mmol). The mixture was stirred at 0 °C for 30 min, quenched with saturated aqueous  $\text{NH}_4\text{Cl}$ , and then extracted with ethyl acetate ( $3 \times 10$  mL). The combined organic layers were washed with brine and dried over  $\text{Na}_2\text{SO}_4$ . The solvent was removed under reduced pressure and the residue was purified by silica gel column chromatography using ethyl acetate/hexane = 1/8 as an eluent to give 1-(2-bromophenyl)-3-phenylpropan-1-ol (**S4a**) as a white solid (3.31 g, 11.4 mmol, 57%):  $^1\text{H}$  NMR (400 MHz,  $\text{CDCl}_3$ )  $\delta$  1.93–2.15 (m, 3H,  $\text{CH}_2$ , OH), 2.69–2.93 (m, 2H,



CH<sub>2</sub>), 5.08 (dt,  $J = 3.9, 8.9$  Hz, 1H, CH), 7.12 (td,  $J = 1.7, 7.7$  Hz, 1H, Ar), 7.15–7.30 (m, 5H, Ar), 7.33 (td,  $J = 1.1, 7.7$  Hz, 1H, Ar), 7.50 (dd,  $J = 1.0, 8.0$  Hz, 1H, Ar), 7.57 (dd,  $J = 1.8, 7.8$  Hz, 1H, Ar).

To a CH<sub>2</sub>Cl<sub>2</sub> solution (110 mL) of 1-(2-bromophenyl)-3-phenylpropan-1-ol (**S4a**) (3.20 g, 11.0 mmol) at 0 °C were added triethylsilane (3.50 mL, 22.0 mmol) and boron trifluoride etherate (1.72 mL, 12.1 mmol). The mixture was then stirred at room temperature for 17 h, quenched with saturated aqueous NaHCO<sub>3</sub>, and then extracted with ethyl acetate (2 × 10 mL). The combined organic layers were washed with brine and dried over Na<sub>2</sub>SO<sub>4</sub>. The solvent was removed under reduced pressure and the residue was purified by silica gel column chromatography using hexane as an eluent to give 1-bromo-2-(3-phenylpropyl)benzene (**S5a**) as a colorless liquid (1.69 g, 6.13 mmol, 56%): <sup>1</sup>H NMR (400 MHz, CDCl<sub>3</sub>)  $\delta$  1.95 (quint,  $J = 7.1$  Hz, 2H, CH<sub>2</sub>), 2.69 (t,  $J = 7.5$  Hz, 2H, CH<sub>2</sub>), 2.77 (t,  $J = 7.5$  Hz, 2H, CH<sub>2</sub>), 7.03 (td,  $J = 2.4, 6.7$  Hz, 1H, Ar), 7.13–7.32 (m, 7H, Ar), 7.51 (d,  $J = 7.5$  Hz, 1H, Ar).

**4-(2-(3-Phenylpropyl)phenyl)but-3-yn-1-ol (8g).** A mixture of 1-bromo-2-(3-phenylpropyl)benzene

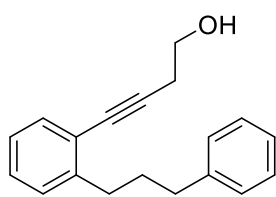

(**S5a**) (155 mg, 560  $\mu$ mol), SPhos (13.1 mg, 31.9  $\mu$ mol, 6 mol%), PdCl<sub>2</sub>(CH<sub>3</sub>CN)<sub>2</sub> (2.6 mg, 10  $\mu$ mol, 2 mol%), Cs<sub>2</sub>CO<sub>3</sub> (391 mg, 1.20 mmol), dry CH<sub>3</sub>CN (5.0 mL), and 3-butyne-1-ol (114  $\mu$ L, 1.50 mmol) was heated at 60 °C for 7 h. After being cooled to room temperature, the reaction mixture was diluted with ethyl acetate and filtered through a pad of celite. The filtrate was concentrated in vacuo and the

residue was chromatographed on silica gel with ethyl acetate/hexane = 1/4 as an eluent to give 4-(2-(3-phenylpropyl)phenyl)but-3-yn-1-ol (**8g**) (98.5 mg, 372  $\mu$ mol, 66%) as a yellow liquid: <sup>1</sup>H NMR (500 MHz, CDCl<sub>3</sub>)  $\delta$  1.91–2.01 (m, 3H, CH<sub>2</sub>, OH), 2.63 (t,  $J = 7.0$  Hz, 2H, CH<sub>2</sub>), 2.67 (t,  $J = 7.7$  Hz, 2H, CH<sub>2</sub>), 2.79 (t,  $J = 8.1$  Hz, 2H, CH<sub>2</sub>), 3.74 (t,  $J = 6.3$  Hz, 2H, CH<sub>2</sub>), 7.10 (td,  $J = 1.7, 7.5$  Hz, 1H, CH<sub>2</sub>), 7.14–7.22 (m, 5H, Ar), 7.27 (t,  $J = 7.5$  Hz, 2H, Ar), 7.37 (d,  $J = 7.7$  Hz, 1H, Ar); <sup>13</sup>C NMR (125 MHz, CDCl<sub>3</sub>)  $\delta$  23.8 (CH<sub>2</sub>), 32.0 (CH<sub>2</sub>), 34.2 (CH<sub>2</sub>), 35.6 (CH<sub>2</sub>), 61.2 (CH<sub>2</sub>), 81.0 (C), 89.7 (C), 122.6 (C), 125.7 (2CH), 128.0 (CH), 128.2 (2CH), 128.4 (2CH), 128.6 (CH), 132.2 (CH), 142.2 (C), 144.2 (C); HRMS-EI  $m/z$  [ $M$ ]<sup>+</sup> calcd for C<sub>19</sub>H<sub>20</sub>O: 264.1514, found: 264.1517.

#### 1.2.7. 1-(3-Methylbut-1-yn-1-yl)-2-(3-phenylpropyl)benzene (8b).

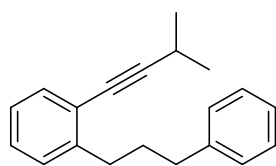

The title compound was synthesized using the same procedure described above.

Yellow liquid: <sup>1</sup>H NMR (400 MHz, CDCl<sub>3</sub>)  $\delta$  1.25 (d,  $J = 6.9$  Hz, 6H, Me (*i*-Pr)), 1.97 (quint,  $J = 7.6$  Hz, 2H, CH<sub>2</sub>), 2.68 (t,  $J = 7.7$  Hz, 2H, CH<sub>2</sub>), 2.75–2.85 (m, 3H, CH, CH<sub>2</sub>), 7.10 (td,  $J = 2.1, 7.3$  Hz, 1H, Ar), 7.14–7.21 (m, 5H, Ar), 7.27 (t,  $J = 7.6$  Hz, 2H, Ar), 7.35 (d,  $J = 7.6$  Hz, 1H, Ar); <sup>13</sup>C NMR (125 MHz, CDCl<sub>3</sub>)  $\delta$  21.3 (CH), 23.1 (2CH<sub>3</sub>), 32.1 (CH<sub>2</sub>), 34.4 (CH<sub>2</sub>), 35.9 (CH<sub>2</sub>), 78.4 (C), 99.3 (C), 123.3 (C), 125.6 (CH), 125.7 (CH), 127.5 (CH), 128.2 (2CH), 128.4 (2CH), 128.6 (CH), 132.0 (CH), 142.4 (C), 144.1 (C); HRMS-ESI  $m/z$  [ $M$ ]<sup>+</sup> calcd for C<sub>20</sub>H<sub>22</sub>: 262.1722, found: 262.1726.

### 1.2.8. 1-(Pent-1-yn-1-yl)-2-(3-phenylpropyl)benzene (8c).

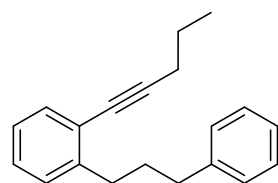

The title compound was synthesized using the same procedure described above. Colorless liquid:  $^1\text{H}$  NMR (600 MHz,  $\text{CDCl}_3$ )  $\delta$  1.10 (t,  $J = 7.2$  Hz, 3H, Me (*n*-Pr)), 1.66 (sext,  $J = 7.2$  Hz, 2H,  $\text{CH}_2$  (*n*-Pr)), 2.01 (quint,  $J = 7.7$  Hz, 2H,  $\text{CH}_2$ ), 2.42 (t,  $J = 6.9$  Hz, 2H,  $\text{CH}_2$  (*n*-Pr)), 2.72 (t,  $J = 7.7$  Hz, 2H,  $\text{CH}_2$ ), 2.85 (t,  $J = 7.7$  Hz, 2H,  $\text{CH}_2$ ), 7.14 (dt,  $J = 1.6, 7.5$  Hz, 1H, Ar), 7.18–7.26 (m, 5H, Ar), 7.31 (dd,  $J = 7.1, 7.3$  Hz, 2H, Ar), 7.41 (d,  $J = 7.5$  Hz, 1H, Ar);  $^{13}\text{C}$  NMR (150 MHz,  $\text{CDCl}_3$ )  $\delta$  13.6 ( $\text{CH}_3$ ), 21.5 ( $\text{CH}_2$ ), 22.3 ( $\text{CH}_2$ ), 32.2 ( $\text{CH}_2$ ), 34.4 ( $\text{CH}_2$ ), 35.8 ( $\text{CH}_2$ ), 79.3 (C), 93.7 (C), 123.4 (C), 125.6 (CH), 125.7 (CH), 127.5 (CH), 128.2 (2CH), 128.4 (2CH), 128.6 (CH), 132.2 (CH), 142.4 (C), 144.1 (C); HRMS-EI  $m/z$   $[\text{M}]^+$  calcd for  $\text{C}_{20}\text{H}_{22}$ : 262.1722, found: 262.1721.

### 1.2.9. 1-(Phenyleth-1-yn-1-yl)-2-(3-phenylpropyl)benzene (8d).

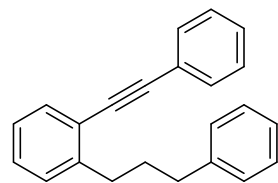

The title compound was synthesized using the same procedure described above. Yellow liquid:  $^1\text{H}$  NMR (600 MHz,  $\text{CDCl}_3$ )  $\delta$  2.05 (quint,  $J = 7.7$  Hz, 2H,  $\text{CH}_2$ ), 2.72 (d,  $J = 7.7$  Hz, 2H,  $\text{CH}_2$ ), 2.91 (t,  $J = 7.7$  Hz, 2H,  $\text{CH}_2$ ), 7.13–7.29 (m, 8H, Ar), 7.30–7.40 (m, 3H, Ar), 7.46 (dd,  $J = 2.0, 6.6$  Hz, 2H, Ar), 7.51 (d,  $J = 7.6$  Hz, 1H, Ar);  $^{13}\text{C}$  NMR (150 MHz,  $\text{CDCl}_3$ )  $\delta$  32.2 ( $\text{CH}_2$ ), 34.4 ( $\text{CH}_2$ ), 35.8 ( $\text{CH}_2$ ), 88.2 (C), 92.9 (C), 122.6 (C), 123.5 (C), 125.7 (CH), 125.8 (CH), 128.1 (CH), 128.3 (2CH), 128.3 (2CH), 128.4 (CH), 128.5 (2CH), 128.8 (CH), 131.5 (2CH), 132.2 (CH), 142.3 (C), 144.4 (C); HRMS-EI  $m/z$   $[\text{M}]^+$  calcd for  $\text{C}_{23}\text{H}_{20}$ : 296.1565, found: 296.1562.

### 1.2.10. Trimethyl((2-(3-phenylpropyl)phenyl)ethynyl)silane (8e).

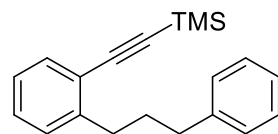

The title compound was synthesized using the same procedure described above. Yellow liquid:  $^1\text{H}$  NMR (500 MHz,  $\text{CDCl}_3$ )  $\delta$  0.26 (s, 9H, Me (TMS)), 1.98 (quint,  $J = 7.7$  Hz, 2H,  $\text{CH}_2$ ), 2.68 (t,  $J = 7.7$  Hz, 2H,  $\text{CH}_2$ ), 2.83 (t,  $J = 7.7$  Hz, 2H,  $\text{CH}_2$ ), 7.12 (td,  $J = 1.2, 7.4$  Hz, 1H, Ar), 7.17 (d,  $J = 7.7$  Hz, 2H, Ar), 7.20 (d,  $J = 7.0$  Hz, 2H, Ar), 7.23 (td,  $J = 1.2, 7.5$  Hz, 1H, Ar), 7.28 (t,  $J = 7.6$  Hz, 2H, Ar), 7.43 (dd,  $J = 1.2, 7.7$  Hz, 1H, Ar);  $^{13}\text{C}$  NMR (125 MHz,  $\text{CDCl}_3$ )  $\delta$  0.0 (3 $\text{CH}_3$ ), 32.2 ( $\text{CH}_2$ ), 34.5 ( $\text{CH}_2$ ), 35.9 ( $\text{CH}_2$ ), 97.8 (C), 103.9 (C), 122.5 (C), 125.7 (CH), 125.7 (CH), 128.3 (2CH), 128.4 (2CH), 128.6 (CH), 128.7 (CH), 132.5 (CH), 142.4 (C), 144.9 (C); HRMS-EI  $m/z$   $[\text{M}]^+$  calcd for  $\text{C}_{20}\text{H}_{24}\text{Si}$ : 292.1647, found: 292.1651.

### 1.2.11. 4-(2-(3-Phenylpropyl)phenyl)but-3-yn-1-amine (8h).

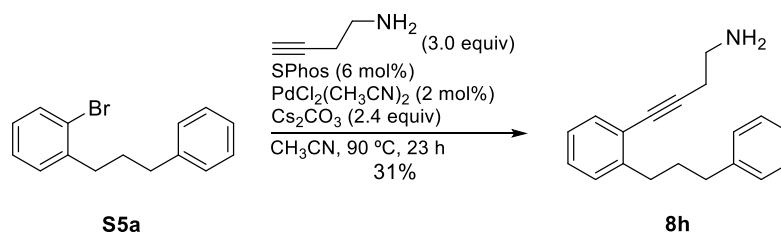

**Scheme S3.** Preparation of 4-(2-(3-phenylpropyl)phenyl)but-3-yn-1-amine (8h).

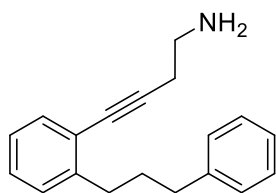

1-Bromo-2-(3-phenylpropyl)benzene (**S5a**) (50.3 mg, 180  $\mu$ mol), SPhos (4.1 mg, 10  $\mu$ mol, 6 mol%),  $\text{PdCl}_2(\text{CH}_3\text{CN})_2$  (1.0 mg, 3.8  $\mu$ mol, 2 mol%),  $\text{Cs}_2\text{CO}_3$  (144 mg, 440  $\mu$ mol) and dry  $\text{CH}_3\text{CN}$  (1.8 mL) and 3-butyne-1-amine (50  $\mu$ L, 550  $\mu$ mol) were added to a dried shield tube and the mixture was heated with stirring at 90  $^\circ\text{C}$  for 23 h.

After being cooled to room temperature, the reaction mixture was diluted with ethyl acetate and filtered through a pad of celite. The filtrate was concentrated in vacuo and the residue was chromatographed on silica gel with methanol/chloroform = 1/5 as an eluent to give 4-(2-(3-phenylpropyl)phenyl)but-3-yn-1-amine (**8h**) (14.5 mg, 55  $\mu$ mol, 31%) as a yellow liquid:  $^1\text{H}$  NMR (300 MHz,  $\text{CDCl}_3$ )  $\delta$  1.63 (app. br s, 2H,  $\text{CH}_2$ ), 1.93–2.04 (m, 2H,  $\text{CH}_2$ ), 2.54 (t,  $J$  = 6.4 Hz, 2H,  $\text{CH}_2$ ), 2.68 (t,  $J$  = 7.7 Hz, 2H,  $\text{CH}_2$ ), 2.80 (t,  $J$  = 7.2 Hz, 2H,  $\text{CH}_2$ ), 2.89 (app. br s, 2H,  $\text{NH}_2$ ), 7.11–7.25 (m, 6H, Ar), 7.28 (t,  $J$  = 7.6 Hz, 2H, Ar), 7.38 (d,  $J$  = 7.6 Hz, 1H, Ar);  $^{13}\text{C}$  NMR (75.5 MHz,  $\text{CDCl}_3$ )  $\delta$  24.6 ( $\text{CH}_2$ ), 32.1 ( $\text{CH}_2$ ), 34.2 ( $\text{CH}_2$ ), 35.7 ( $\text{CH}_2$ ), 41.3 ( $\text{CH}_2$ ), 80.6 (C), 91.2 (C), 122.9 (C), 125.7 (2CH), 127.8 (CH), 128.2 (2CH), 128.4 (2CH), 128.6 (CH), 132.3 (CH), 142.3 (C), 144.1 (C); HRMS-ESI  $m/z$   $[\text{M}+\text{H}]^+$  calcd for  $\text{C}_{19}\text{H}_{22}\text{N}$ : 264.1752, found: 264.1741.

#### 1.2.12. *N,N*-Dimethyl-4-(2-(3-phenylpropyl)phenyl)but-3-yn-1-amine (**8f**).

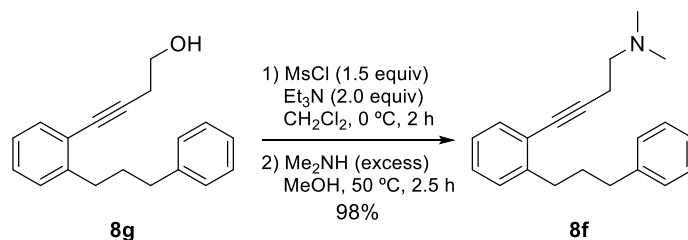

**Scheme S4.** Preparation of *N,N*-dimethyl-4-(2-(3-phenylpropyl)phenyl)but-3-yn-1-amine (**8f**).

To a mixture of 4-(2-(3-phenylpropyl)phenyl)but-3-yn-1-ol (**8g**) (36.1 mg, 140  $\mu$ mol), triethylamine (40  $\mu$ L, 270  $\mu$ mol) and  $\text{CH}_2\text{Cl}_2$  (1.5 mL) at 0  $^\circ\text{C}$  was added methanesulfonyl chloride (30  $\mu$ L, 400  $\mu$ mol). The mixture was stirred at 0  $^\circ\text{C}$  for 2 h, quenched with saturated aqueous  $\text{NaHCO}_3$ , and extracted with  $\text{CH}_2\text{Cl}_2$  (2  $\times$  5 mL). The combined organic layers were washed with brine and dried over  $\text{Na}_2\text{SO}_4$ , and evaporated. To the residue was added 50% aqueous solution of dimethylamine (1.00 mL, 11 mmol) and ethanol (1 mL).

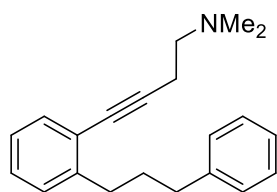

The mixture was stirred at 50  $^\circ\text{C}$  for 2.5 h, cooled to room temperature and then extracted with  $\text{CH}_2\text{Cl}_2$ . The organic layer was washed with brine, dried over  $\text{Na}_2\text{SO}_4$ , and evaporated. The residue was purified by silica gel column chromatography using ethyl acetate as an eluent to give *N,N*-dimethyl-4-(2-(3-phenylpropyl)phenyl)but-3-yn-1-amine (**8f**) as a yellow liquid (38.9 mg, 130  $\mu$ mol, 93%):  $^1\text{H}$  NMR (500 MHz,  $\text{CDCl}_3$ )  $\delta$  1.97 (quint,  $J$  = 8.0 Hz, 2H,  $\text{CH}_2$ ), 2.30 (s, 6H,  $\text{NMe}_2$ ), 2.55–2.60 (m, 4H,  $\text{CH}_2$ ), 2.68 (t,  $J$  = 7.7 Hz, 2H,  $\text{CH}_2$ ), 2.80 (t,  $J$  = 8.0 Hz, 2H,  $\text{CH}_2$ ), 7.10 (td,  $J$  = 1.4, 7.3 Hz, 1H, Ar), 7.13–7.23 (m, 5H, Ar), 7.28 (t,  $J$  = 7.5 Hz, 2H, Ar), 7.36 (d,  $J$  = 7.8 Hz, 1H, Ar);  $^{13}\text{C}$  NMR (125 MHz,  $\text{CDCl}_3$ )  $\delta$  18.5 ( $\text{CH}_2$ ), 32.1 ( $\text{CH}_2$ ), 34.2 ( $\text{CH}_2$ ), 35.7 ( $\text{CH}_2$ ), 45.2 (2 $\text{CH}_3$ ), 58.5 ( $\text{CH}_2$ ), 79.9 (C), 91.7 (C),

123.1 (C), 125.6 (CH), 125.7 (CH), 127.7 (CH), 128.2 (2CH), 128.4 (2CH), 128.6 (CH), 132.2 (CH), 142.4 (C), 144.2 (C); HRMS-EI  $m/z$   $[M]^+$  calcd for  $C_{21}H_{25}N$ : 291.1987, found: 291.1983.

### 1.3. Synthesis of o-alkynyl(arylalkyl)benzenes 7

#### 1.3.1. Synthesis of 7d (typical synthetic procedure for 7c–e and 7g–i).

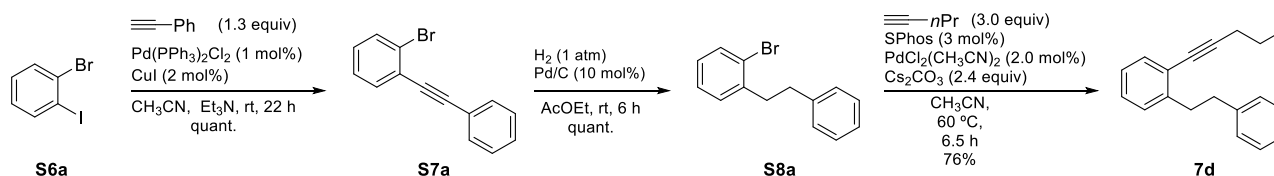

**Scheme S5.** Preparation of 1-(pent-1-yn-1-yl)-2-phenethylbenzene (**7d**).

To a mixture of 1-bromo-2-iodobenzene (**S6a**) (1.25 mL, 10.0 mmol), triethylamine (40 mL) and  $CH_3CN$  (40 mL) were added  $PdCl_2(PPh_3)_2$  (70.2 mg, 100  $\mu$ mol, 1 mol%) and  $CuI$  (38.5 mg, 202  $\mu$ mol, 2 mol%). The mixture was cooled to 0 °C, to which ethynylbenzene (1.43 mL, 13.0 mmol) was added. The mixture was stirred at room temperature for 22 h, quenched with saturated aqueous  $NaHCO_3$ , and the mixture was extracted with ethyl acetate ( $3 \times 10$  mL). The combined organic layers were washed with brine, dried over  $Na_2SO_4$ , and evaporated. The residue was purified by silica gel column chromatography using ethyl acetate/hexane = 1/50 as an eluent to give 1-bromo-2-(phenylethynyl)benzene (**S7a**)<sup>2</sup> as a colorless liquid (2.57 g, 9.98 mmol, 100%).

A suspension of **S7a** (974 mg, 3.78 mmol) and 10%  $Pd/C$  (200 mg, 188  $\mu$ mol) in ethyl acetate (15 mL) was stirred under a balloon of hydrogen for 6 h at room temperature. The reaction mixture was diluted with ethyl acetate and filtered through a pad of celite. The filtrate was evaporated, and the residue was chromatographed on silica gel with hexane as an eluent to give 1-bromo-2-phenethylbenzene (**S8a**)<sup>3</sup> (988 mg, 3.78 mmol, 100%) as a colorless liquid.

**1-(Pent-1-yn-1-yl)-2-phenethylbenzene (7d).** To a mixture of 1-bromo-2-phenethylbenzene (**S8a**) (131 mg, 500  $\mu$ mol),  $SPhos$  (12.3 mg, 30.0  $\mu$ mol, 6 mol%),  $PdCl_2(CH_3CN)_2$  (2.6 mg, 10  $\mu$ mol, 2 mol%),  $Cs_2CO_3$  (391 mg, 1.20 mmol) and dry  $CH_3CN$  (5 mL) were added 1-pentyne (146  $\mu$ L, 1.5 mmol), and the mixture was stirred at 60 °C for 6.5 h. After being cooled to room temperature, the reaction mixture was diluted with ethyl acetate and filtered through a pad of celite. The filtrate was concentrated in vacuo and the residue was chromatographed on silica gel with hexane as an eluent to give 1-(pent-1-yn-1-yl)-2-phenethylbenzene (**7d**) (93.9 mg, 378  $\mu$ mol, 76%) as an orange liquid:  $^1H$  NMR (300 MHz,  $CDCl_3$ )  $\delta$  1.05 (td,  $J = 2.3, 7.4$  Hz, 3H, Me ( $n$ -Pr)), 1.64 (sext,  $J = 7.1$  Hz, 2H,  $CH_2$  ( $n$ -Pr)), 2.44 (td,  $J = 2.3, 7.0$  Hz, 2H,  $CH_2$  ( $n$ -Pr)), 2.86–2.96 (m, 2H,  $CH_2$ ), 2.99–3.11 (m, 2H,  $CH_2$ ), 7.07–7.29 (m, 8H, Ar), 7.36–7.45 (m, 1H, Ar);  $^{13}C$  NMR (75.5 MHz,  $CDCl_3$ )  $\delta$  13.6 ( $CH_3$ ), 21.6 ( $CH_2$ ), 22.3 ( $CH_2$ ), 37.0 (2 $CH_2$ ), 79.3 (C), 93.9 (C), 123.4 (C), 125.8 (2CH), 127.5 (CH), 128.2 (2CH), 128.4 (2CH), 128.7 (CH), 132.2 (CH), 142.1 (C), 143.4 (C); HRMS-EI  $m/z$   $[M]^+$  calcd for  $C_{19}H_{20}$ : 248.1565, found: 248.1569.

<sup>2</sup> Z. U. Levi and T. D. Tilley, *J. Am. Chem. Soc.*, 2009, **131**, 2796.

<sup>3</sup> D. S. Roman, Y. Takahashi and A. B. Charette, *Org. Lett.*, 2011, **13**, 3242.

### 1.3.2. 1-(3,3-Dimethylbut-1-yn-1-yl)-2-phenethylbenzene (7c).

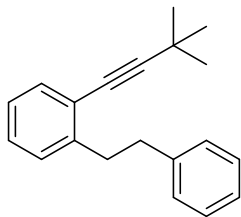

The title compound was synthesized using the same procedure described above. Colorless liquid:  $^1\text{H}$  NMR (500 MHz,  $\text{CDCl}_3$ )  $\delta$  1.35 (s, 9H, Me (*t*-Bu)), 2.91 (d,  $J = 7.4$  Hz, 1H,  $\text{CH}_2$ ), 2.93 (d,  $J = 5.2$  Hz, 1H,  $\text{CH}_2$ ), 3.04 (d,  $J = 5.2$  Hz, 1H,  $\text{CH}_2$ ), 3.06 (d,  $J = 7.4$  Hz, 1H,  $\text{CH}_2$ ), 7.10–7.26 (m, 6H, Ar), 7.29 (t,  $J = 7.5$  Hz, 2H, Ar), 7.39 (dd,  $J = 1.9, 7.5$  Hz, 1H, Ar);  $^{13}\text{C}$  NMR (125 MHz,  $\text{CDCl}_3$ )  $\delta$  28.2 (C), 31.2 (3 $\text{CH}_3$ ), 37.0 (2 $\text{CH}_2$ ), 77.6 (C), 102.2 (C), 123.2 (C), 125.8 (2CH), 127.6 (CH), 128.3 (2CH), 128.4 (2CH), 128.9 (CH), 132.2 (CH), 142.1 (C), 143.4 (C); HRMS-ESI  $m/z$   $[\text{M}+\text{Na}]^+$  calcd for  $\text{C}_{20}\text{H}_{22}\text{Na}$ : 285.1614, found: 285.1614.

### 1.3.3. Trimethyl((2-phenethylphenyl)ethynyl)silane (7e).

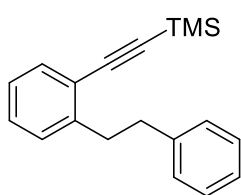

The title compound was synthesized using the same procedure described above. Light brown liquid:  $^1\text{H}$  NMR (300 MHz,  $\text{CDCl}_3$ )  $\delta$  0.08 (s, 9H, TMS), 2.67–2.77 (m, 2H,  $\text{CH}_2$ ), 2.78–2.94 (m, 2H,  $\text{CH}_2$ ), 6.89–7.10 (m, 8H, Ar), 7.27 (d,  $J = 7.7$  Hz, 1H, Ar);  $^{13}\text{C}$  NMR (75.5 MHz,  $\text{CDCl}_3$ )  $\delta$  15.5 (3 $\text{CH}_3$ ), 45.1 ( $\text{CH}_2$ ), 45.1 ( $\text{CH}_2$ ), 93.7 (C), 98.4 (C), 113.4 (C), 116.1 (2CH), 118.0 (2CH), 118.1 (2CH), 118.3 (CH), 118.5 (CH), 121.5 (CH), 129.0 (C), 130.7 (C); HRMS-EI  $m/z$   $[\text{M}]^+$  calcd for  $\text{C}_{19}\text{H}_{22}\text{Si}$ : 278.1491, found: 278.1489.

### 1.3.4. 1-(3,3-Dimethylbut-1-yn-1-yl)-2-(4-methylphenethyl)benzene (7g).

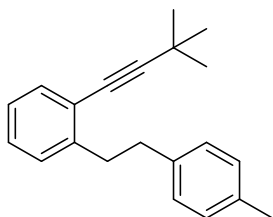

The title compound was synthesized using the same procedure described above. Yellow solid: mp 34.0–34.5 °C:  $^1\text{H}$  NMR (300 MHz,  $\text{CDCl}_3$ )  $\delta$  1.34 (s, 9H,  $\text{CH}_3$  (*t*-Bu)), 2.30 (s, 3H,  $\text{CH}_3$  (*p*-tol)), 2.80–2.92 (m, 2H,  $\text{CH}_2$ ), 2.96–3.09 (m, 2H,  $\text{CH}_2$ ), 7.01–7.16 (m, 7H, Ar), 7.33–7.41 (m, 1H, Ar);  $^{13}\text{C}$  NMR (75.5 MHz,  $\text{CDCl}_3$ )  $\delta$  21.0 ( $\text{CH}_3$ ), 28.1 (C), 31.1 (3 $\text{CH}_3$ ), 36.6 ( $\text{CH}_2$ ), 37.1 ( $\text{CH}_2$ ), 77.7 (C), 102.0 (C), 123.2 (C), 125.8 (CH), 127.6 (CH), 128.2 (2CH), 128.8 (CH), 129.0 (2CH), 132.1 (CH), 135.1 (C), 139.0 (C), 143.5 (C); HRMS-EI  $m/z$   $[\text{M}]^+$  calcd for  $\text{C}_{21}\text{H}_{24}$ : 276.1878, found: 276.1877.

### 1.3.5. 1-(3,3-Dimethylbut-1-yn-1-yl)-2-(4-(trifluoromethyl)phenethyl)benzene (7h).

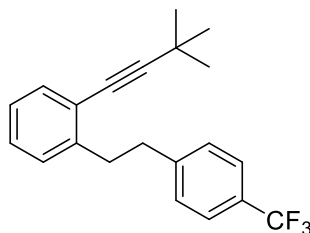

The title compound was synthesized using the same procedure described above. Colorless liquid:  $^1\text{H}$  NMR (500 MHz,  $\text{CDCl}_3$ )  $\delta$  1.34 (s, 9H,  $\text{CH}_3$  (*t*-Bu)), 2.95–3.02 (m, 2H,  $\text{CH}_2$ ), 3.02–3.09 (m, 2H,  $\text{CH}_2$ ), 7.08 (dd,  $J = 1.5, 7.2$  Hz, 1H, Ar), 7.11–7.20 (m, 2H, Ar), 7.29 (d,  $J = 8.0$  Hz, 2H, Ar), 7.39 (dd,  $J = 1.9, 7.2$  Hz, 1H, Ar), 7.53 (d,  $J = 8.2$  Hz, 2H, Ar);  $^{13}\text{C}$  NMR (125 MHz,  $\text{CDCl}_3$ )  $\delta$  28.2 (C), 31.1 (3 $\text{CH}_3$ ), 36.5 ( $\text{CH}_2$ ), 36.7 ( $\text{CH}_2$ ), 77.5 (C), 102.3 (C), 123.3 (C), 124.5 (q,  $^1J = 268.4$  Hz,  $\text{CF}_3$ ), 125.2 (q,  $^3J = 3.6$  Hz, 2CH), 126.0 (CH), 127.6 (CH), 128.2 (q,  $^2J = 32.4$  Hz, C), 128.7 (2CH), 128.8 (CH), 132.3 (CH), 142.6 (C), 146.1 (C); HRMS-EI  $m/z$   $[\text{M}]^+$  calcd for  $\text{C}_{21}\text{H}_{21}\text{F}_3$ : 330.1595, found: 330.1599.

### 1.3.6. 1-(4-Methylphenethyl)-2-(pent-1-yn-1-yl)benzene (7i).

The title compound was synthesized using the same procedure described above. Colorless liquid:  $^1\text{H}$  NMR

(300 MHz, CDCl<sub>3</sub>)  $\delta$  1.06 (td,  $J$  = 1.6, 7.3 Hz, 3H, Me (*n*-Pr)), 1.65 (sext,  $J$  = 7.2 Hz, 2H, CH<sub>2</sub> (*n*-Pr)), 2.31 (s, 3H, CH<sub>3</sub> (*p*-tol)), 2.44 (td,  $J$  = 1.3, 7.0 Hz, 2H, CH<sub>2</sub> (*n*-Pr)), 2.82–2.94 (m, 2H, CH<sub>2</sub>), 2.97–3.10 (m, 2H, CH<sub>2</sub>), 7.02–7.17 (m, 7H, Ar), 7.36–7.45 (m, 1H, Ar); <sup>13</sup>C NMR (75.5 MHz, CDCl<sub>3</sub>)  $\delta$  13.6 (CH<sub>3</sub>), 21.0 (CH<sub>3</sub>), 21.6 (CH<sub>2</sub>), 22.3 (CH<sub>2</sub>), 36.6 (CH<sub>2</sub>), 37.1 (CH<sub>2</sub>), 79.3 (C), 93.8 (C), 123.4 (C), 125.8 (CH), 127.6 (CH), 128.3 (2CH), 128.7 (CH), 129.0 (2CH), 132.2 (CH), 135.2 (C), 139.0 (C), 143.6 (C); HRMS-EI  $m/z$  [ $M$ ]<sup>+</sup> calcd for C<sub>20</sub>H<sub>22</sub>: 262.1722, found: 262.1714.

### 1.3.7. 4-(2-Phenethylphenyl)but-3-yn-1-ol (**7f**).

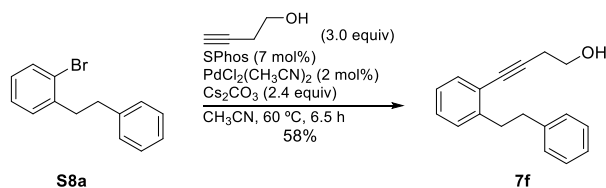

**Scheme S6.** Preparation of 4-(2-phenethylphenyl)but-3-yn-1-ol (**7f**).

To a mixture of 1-bromo-2-phenethylbenzene (**S8a**) (261 mg, 1.00 mmol), SPhos (27.6 mg, 67.2  $\mu$ mol, 7 mol%), PdCl<sub>2</sub>(CH<sub>3</sub>CN)<sub>2</sub> (5.2 mg, 20  $\mu$ mol, 2 mol%), Cs<sub>2</sub>CO<sub>3</sub> (793 mg, 2.43 mmol) and dry CH<sub>3</sub>CN (10 mL) were added 3-butyn-1-ol (230  $\mu$ L, 3.00 mmol), and the mixture was stirred at 60 °C for 6.5 h. After being cooled to room temperature, the reaction mixture was diluted with ethyl acetate and filtered through a pad of celite.

The filtrate was concentrated in vacuo, and the residue was chromatographed on silica gel with ethyl acetate/hexane = 1/4 as an eluent to give 4-(2-phenethylphenyl)but-3-yn-1-ol (**7f**) (144 mg, 575  $\mu$ mol, 58%) as a colorless liquid: <sup>1</sup>H NMR (300 MHz, CDCl<sub>3</sub>)  $\delta$  1.93 (app. br s, 1H, OH), 2.72 (t,  $J$  = 6.4 Hz, 2H, CH<sub>2</sub>), 2.86–2.98 (m, 2H, CH<sub>2</sub>), 2.99–3.11 (m, 2H, CH<sub>2</sub>), 3.73–3.86 (m, 2H, CH<sub>2</sub>), 7.08–7.34 (m, 8H, Ar), 7.37–7.45 (m, 1H, Ar); <sup>13</sup>C NMR (75.5 MHz, CDCl<sub>3</sub>)  $\delta$  23.9 (CH<sub>2</sub>), 36.8 (CH<sub>2</sub>), 37.0 (CH<sub>2</sub>), 61.2 (CH<sub>2</sub>), 81.0 (C), 89.9 (C), 122.7 (C), 125.9 (2CH), 128.0 (CH), 128.3 (2CH), 128.4 (2CH), 128.8 (CH), 132.4 (CH), 141.9 (C), 143.6 (C); HRMS-EI  $m/z$  [ $M$ ]<sup>+</sup> calcd for C<sub>18</sub>H<sub>18</sub>O: 250.1358, found: 250.1358.

### 1.3.8. *N,N*-Dimethyl-4-(2-phenethylphenyl)but-3-yn-1-amine (**7a**).

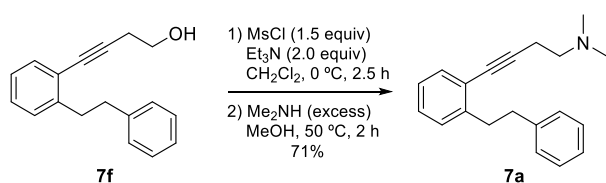

**Scheme S7.** Preparation of *N,N*-dimethyl-4-(2-phenethylphenyl)but-3-yn-1-amine (**7a**).

To a mixture of 4-(2-phenethylphenyl)but-3-yn-1-ol (**7f**) (53.6 mg, 214  $\mu$ mol), triethylamine (60  $\mu$ L, 400  $\mu$ mol) and CH<sub>2</sub>Cl<sub>2</sub> (2.0 mL) was added methanesulfonyl chloride (40.0  $\mu$ L, 300  $\mu$ mol) at 0 °C. The mixture was stirred at 0 °C for 2.5 h, quenched with saturated aqueous NaHCO<sub>3</sub>, and extracted with CH<sub>2</sub>Cl<sub>2</sub> (2  $\times$  5.0

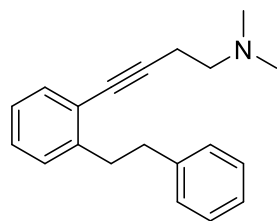

mL). The combined organic layers were washed with brine and dried over Na<sub>2</sub>SO<sub>4</sub>. Then the solvent was removed under reduced pressure. To the residue were added 50% aqueous solution of dimethylamine (400  $\mu$ L, 5.0 mmol) and ethanol (1.6 mL), and the mixture was stirred at 50  $^{\circ}$ C for 2 h. The mixture was extracted with CH<sub>2</sub>Cl<sub>2</sub>, and the organic layer was washed with brine and dried over Na<sub>2</sub>SO<sub>4</sub>. Then the solvent was removed under reduced pressure and the residue was purified by silica gel column chromatography using ethyl acetate as an eluent to give *N,N*-dimethyl-4-(2-phenethylphenyl)but-3-yn-1-amine (**7a**) as a yellow liquid (41.8 mg, 151  $\mu$ mol, 71%): <sup>1</sup>H NMR (400 MHz, CDCl<sub>3</sub>)  $\delta$  2.30 (s, 6H, CH<sub>3</sub> (NMe<sub>2</sub>)), 2.63 (app. br s, 4H, CH<sub>2</sub> (Bn)), 2.88–2.96 (m, 2H, CH<sub>2</sub>), 3.01–3.10 (m, 2H, CH<sub>2</sub>), 7.09–7.23 (m, 6H, Ar), 7.26–7.32 (m, 2H, Ar), 7.37–7.41 (m, 1H, Ar); <sup>13</sup>C NMR (75.5 MHz, CDCl<sub>3</sub>)  $\delta$  30.2 (CH<sub>2</sub>), 44.9 (CH<sub>2</sub>), 45.0 (CH<sub>2</sub>), 51.5 (2CH<sub>3</sub>), 62.2 (CH<sub>2</sub>), 79.3 (C), 88.8 (C), 113.8 (C), 116.1 (2CH), 117.6 (CH), 118.0 (2CH), 118.1 (2CH), 118.4 (CH), 121.2 (CH), 129.1 (C), 130.3 (C); HRMS-EI  $m/z$  [M]<sup>+</sup> calcd for C<sub>20</sub>H<sub>23</sub>N: 277.1830, found: 277.1825.

### 1.3.9. *N*-Methyl-4-(2-phenethylphenyl)but-3-yn-1-amine (**7b**).

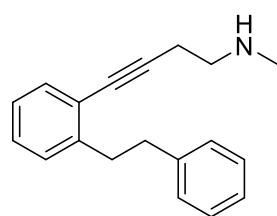

The title compound was synthesized using the same procedure described above. Light brown liquid: <sup>1</sup>H NMR (500 MHz, CDCl<sub>3</sub>)  $\delta$  2.46 (s, 3H, CH<sub>3</sub>), 2.69 (dd,  $J$  = 6.5, 13.2 Hz, 2H, CH<sub>2</sub> (Bn)), 2.85 (t,  $J$  = 6.5 Hz, 2H, CH<sub>2</sub> (Bn)), 2.91 (d,  $J$  = 7.1 Hz, 1H, CH<sub>2</sub>), 2.93 (d,  $J$  = 5.3 Hz, 1H, CH<sub>2</sub>), 3.04 (d,  $J$  = 5.3 Hz, 1H, CH<sub>2</sub>), 3.06 (d,  $J$  = 7.1 Hz, 1H, CH<sub>2</sub>), 3.10–3.22 (m, 1H, NHCH<sub>3</sub>), 7.11–7.16 (m, 2H, Ar), 7.17–7.22 (m, 4H, Ar), 7.26–7.31 (m, 2H, Ar), 7.38–7.43 (m, 1H, Ar); <sup>13</sup>C NMR (125 MHz, CDCl<sub>3</sub>)  $\delta$  31.6 (CH<sub>2</sub>), 43.9 (CH<sub>3</sub>), 44.9 (CH<sub>2</sub>), 44.9 (CH<sub>2</sub>), 55.5 (CH<sub>3</sub>), 79.7 (C), 88.4 (C), 113.7 (C), 116.1 (2CH), 117.7 (CH), 118.1 (2CH), 118.1 (2CH), 118.4 (CH), 121.3 (CH), 129.0 (C), 130.2 (C); HRMS-EI  $m/z$  [M]<sup>+</sup> calcd for C<sub>19</sub>H<sub>21</sub>N: 263.1674, found: 263.1672.

## 1.4. Synthesis of *o*-alkynyl(arylalkyl)benzenes **9**

### 1.4.1. 1-(3,3-Dimethylbut-1-yn-1-yl)-2-(4-phenylbutyl)benzene (**9a**) (typical synthetic procedure for **9a–c**).

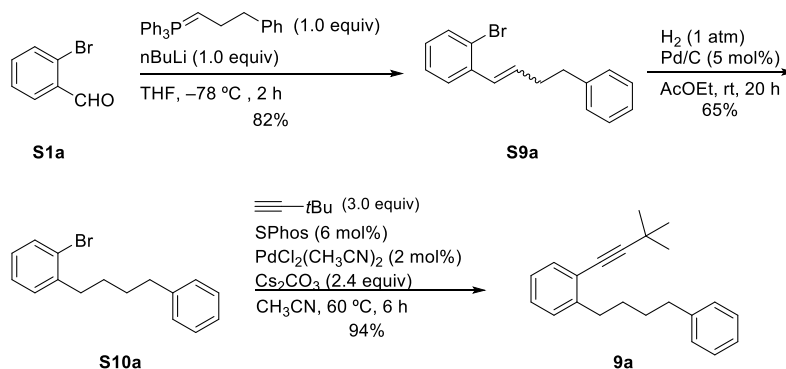

**Scheme S8.** Preparation of 1-(3,3-dimethylbut-1-yn-1-yl)-2-(4-phenylbutyl)benzene (**9a**).

A mixture of (3-iodopropyl)benzene (670  $\mu$ L, 4.16 mmol), triphenylphosphine (1.13 g, 4.32 mmol) and toluene (1.0 mL) was stirred at 100  $^{\circ}$ C for 7.5 h and cooled to room temperature. The resulting precipitate

was collected by filtration and washed with dry Et<sub>2</sub>O to give the phosphonium salt (1.81 g, 3.56 mmol, 86%) as white needles. To a cold solution of the salt (762 mg, 1.50 mmol) in dry THF (15 mL) at 0 °C was added 1.63 M hexane solution of *n*BuLi (920 µL, 1.50 mmol). The mixture was stirred at 0 °C for 2 h, cooled to –78 °C, and 2-bromobenzaldehyde (**S1a**) (173 µL, 1.50 mmol) was added. The resulting mixture was stirred at –78 °C for 2 h and then allowed to warm to room temperature over 30 min. Water was added and the mixture was then extracted with CHCl<sub>3</sub>. The organic layer was dried over Na<sub>2</sub>SO<sub>4</sub> and evaporated under reduced pressure. The residue was purified by silica gel column chromatography using hexane as an eluent to give a mixture of *E*- and *Z*-alkenes **S9a** as a yellow liquid (352 mg, 1.23 mmol, 82%).

A suspension of the mixture of *E*- and *Z*-alkenes **S9a** (352 mg, 1.23 mmol) and 10% Pd/C (63.8 mg, 60.0 µmol) in ethyl acetate (12 mL) was stirred under a balloon of hydrogen for 20 h at room temperature. The reaction mixture was diluted with ethyl acetate and filtered through a pad of celite. The filtrate was concentrated in vacuo and the residue was chromatographed on silica gel with hexane as an eluent to give 1-bromo-2-(4-phenylbutyl)benzene (**S10a**) (230 mg, 795 µmol, 65%) as a colorless liquid.

#### 1-(3,3-Dimethylbut-1-yn-1-yl)-2-(4-phenylbutyl)benzene (**9a**).

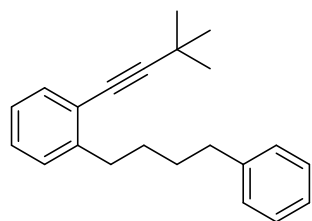

To a mixture of 1-bromo-2-(4-phenylbutyl)benzene (**S10a**) (86.7 mg, 300 µmol), SPhos (7.4 mg, 18 µmol, 6 mol%), PdCl<sub>2</sub>(CH<sub>3</sub>CN)<sub>2</sub> (1.6 mg, 6.2 µmol, 2 mol%), Cs<sub>2</sub>CO<sub>3</sub> (235 mg, 900 µmol) and dry CH<sub>3</sub>CN (3.0 mL) were added 3,3-dimethyl-1-butyne (110 µL, 900 µmol), and the mixture was stirred at 60 °C for 6 h. After being cooled to room temperature, the reaction mixture was diluted with ethyl acetate and filtered

through a pad of celite. The filtrate was concentrated in vacuo and the residue was chromatographed on silica gel with hexane as an eluent to give 1-(3,3-dimethylbut-1-yn-1-yl)-2-(4-phenylbutyl)benzene (**9a**) (82 mg, 282 µmol, 94%) as a colorless liquid: <sup>1</sup>H NMR (300 MHz, CDCl<sub>3</sub>) δ 1.31 (s, 9H, Me (*t*-Bu)), 1.62–1.74 (m, 4H, CH<sub>2</sub>), 2.58–2.69 (m, 2H, CH<sub>2</sub>), 2.72–2.83 (m, 2H, CH<sub>2</sub>), 7.05–7.20 (m, 6H, Ar), 7.21–7.30 (m, 2H, Ar), 7.34 (d, *J* = 7.4 Hz, 1H, Ar); <sup>13</sup>C NMR (75.5 MHz, CDCl<sub>3</sub>) δ 28.1 (C), 30.2 (CH<sub>2</sub>), 31.1 (3CH<sub>3</sub>), 31.5 (CH<sub>2</sub>), 34.7 (CH<sub>2</sub>), 35.9 (CH<sub>2</sub>), 77.8 (C), 102.0 (C), 123.2 (C), 125.5 (CH), 125.6 (CH), 127.5 (CH), 128.2 (2CH), 128.4 (2CH), 128.6 (CH), 131.9 (CH), 142.6 (C), 144.3 (C); HRMS-EI *m/z* [M]<sup>+</sup> calcd for C<sub>22</sub>H<sub>26</sub>: 290.2035, found: 290.2028.

#### 1.4.2. 1-(Pent-1-yn-1-yl)-2-(4-phenylbutyl)benzene (**9b**).

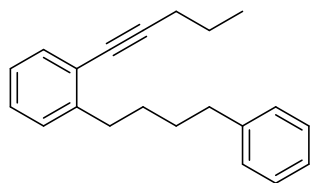

The title compound was synthesized using the same procedure described above. Yellow liquid: <sup>1</sup>H NMR (300 MHz, CDCl<sub>3</sub>) δ 1.05 (td, *J* = 3.7, 7.2 Hz, 3H, Me (*n*-Pr)), 1.61 (sext, *J* = 3.7 Hz, 2H, CH<sub>2</sub> (*n*-Pr)), 1.66–1.75 (m, 4H, CH<sub>2</sub>), 2.40 (td, *J* = 3.5, 6.9 Hz, 2H, CH<sub>2</sub> (*n*-Pr)), 2.55–2.71 (m, 2H, CH<sub>2</sub>), 2.73–2.90 (m, 2H, CH<sub>2</sub>), 7.12–7.28 (m, 8H, Ar), 7.34–7.41 (m, 1H, Ar); <sup>13</sup>C NMR (75.5 MHz, CDCl<sub>3</sub>) δ 13.6 (CH<sub>3</sub>), 21.5 (CH<sub>2</sub>), 22.3 (CH<sub>2</sub>), 30.2 (CH<sub>2</sub>), 31.3 (CH<sub>2</sub>), 34.5 (CH<sub>2</sub>), 35.8 (CH<sub>2</sub>), 79.4 (C), 93.6 (C), 123.4 (C), 125.5 (CH), 125.6 (CH), 127.5 (CH), 128.2 (2CH), 128.4 (2CH), 128.6 (CH), 132.1 (CH), 142.7 (C), 144.3 (C); HRMS-EI *m/z* [M]<sup>+</sup> calcd for C<sub>21</sub>H<sub>24</sub>: 276.1878, found: 276.1880.

#### 1.4.3. 1-(Hept-1-yn-1-yl)-2-(4-phenylbutyl)benzene (**9c**).



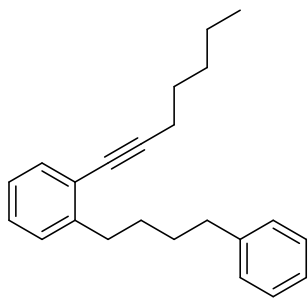

The title compound was synthesized using the same procedure described above. Colorless liquid:  $^1\text{H}$  NMR (500 MHz,  $\text{CDCl}_3$ )  $\delta$  0.94 (dt,  $J = 1.0, 7.4$  Hz, 3H, Me), 1.36–1.42 (m, 2H,  $\text{CH}_2$ ), 1.45–1.51 (m, 2H,  $\text{CH}_2$ ), 1.60–1.66 (m, 2H,  $\text{CH}_2$ ), 1.71–1.74 (m, 4H, 2 $\text{CH}_2$ ), 2.44 (t,  $J = 7.0$  Hz, 2H, Me), 2.67 (t,  $J = 6.6$  Hz, 2H,  $\text{CH}_2$ ), 2.82 (t,  $J = 6.9$  Hz, 2H,  $\text{CH}_2$ ), 7.11–7.13 (m, 1H, Ar), 7.15–7.22 (m, 5H, Ar), 7.27 (t,  $J = 8.3$  Hz, 2H, Ar), 7.39 (d,  $J = 8.0$  Hz, 1H, Ar);  $^{13}\text{C}$  NMR (125 MHz,  $\text{CDCl}_3$ )  $\delta$  14.0 ( $\text{CH}_3$ ), 19.5 ( $\text{CH}_2$ ), 22.2 ( $\text{CH}_2$ ), 28.5 ( $\text{CH}_2$ ), 30.2 ( $\text{CH}_2$ ), 31.1 ( $\text{CH}_2$ ), 31.3 ( $\text{CH}_2$ ), 34.5 ( $\text{CH}_2$ ), 35.8 ( $\text{CH}_2$ ), 79.3 (C), 93.9 (C), 123.4 (C), 125.5 (CH), 125.6 (CH), 127.5 (CH), 128.2 (2CH), 128.4 (2CH), 128.6 (CH), 132.1 (CH), 142.7 (C), 144.3 (C); HRMS-ESI  $m/z$  [ $\text{M}+\text{Na}$ ] $^+$  calcd for  $\text{C}_{23}\text{H}_{28}\text{Na}$ : 327.2083, found: 327.2092.

#### 1.4.4. 2-(3,3-Dimethylbut-1-yn-1-yl)-4-methyl-1-(4-phenylbutyl)benzene (9d).

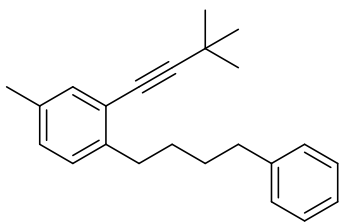

The title compound was synthesized using the same procedure described above. Yellow liquid:  $^1\text{H}$  NMR (400 MHz,  $\text{CDCl}_3$ )  $\delta$  1.30 (s, 9H, Me (*t*-Bu)), 1.62–1.72 (m, 4H,  $\text{CH}_2$ ), 2.25 (s, 3H, Me (*p*-tol)), 2.63 (t,  $J = 6.9$  Hz, 2H,  $\text{CH}_2$ ), 2.73 (t,  $J = 6.9$  Hz, 2H,  $\text{CH}_2$ ), 6.96 (dd,  $J = 1.4, 7.7$  Hz, 1H, Ar), 7.02 (d,  $J = 7.7$  Hz, 1H, Ar), 7.12–7.20 (m, 4H, Ar), 7.25 (t,  $J = 8.3$  Hz, 2H, Ar);  $^{13}\text{C}$  NMR (75.5 MHz,  $\text{CDCl}_3$ )  $\delta$  20.7 ( $\text{CH}_3$ ), 28.1 (C), 30.4 ( $\text{CH}_2$ ), 31.1 (3 $\text{CH}_3$ ), 31.5 ( $\text{CH}_2$ ), 34.2 ( $\text{CH}_2$ ), 35.9 ( $\text{CH}_2$ ), 77.9 (C), 101.6 (C), 123.0 (C), 125.6 (CH), 128.2 (2CH), 128.3 (CH), 128.4 (2CH), 128.5 (CH), 132.4 (CH), 135.0 (C), 141.3 (C), 142.7 (C); HRMS-EI  $m/z$  [ $\text{M}$ ] $^+$  calcd for  $\text{C}_{23}\text{H}_{28}$ : 304.2191, found: 304.2188.

#### 1.4.5. 4-Methyl-2-(pent-1-yn-1-yl)-1-(4-phenylbutyl)benzene (9e).

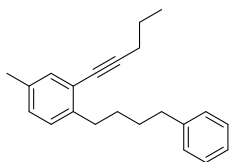

The title compound was synthesized using the same procedure described above. Yellow liquid:  $^1\text{H}$  NMR (400 MHz,  $\text{CDCl}_3$ )  $\delta$  1.03 (t,  $J = 7.4$  Hz, 3H,  $\text{CH}_3$ ), 1.55–1.70 (m, 6H,  $\text{CH}_2$ ), 2.25 (s, 3H, Me (*p*-tol)), 2.38 (t,  $J = 6.9$  Hz, 2H,  $\text{CH}_2$ ), 2.62 (br t,  $J = 5.8$  Hz, 2H,  $\text{CH}_2$ ), 2.73 (br t,  $J = 5.8$  Hz, 2H,  $\text{CH}_2$ ), 6.96 (br d,  $J = 7.7$  Hz, 1H, Ar), 7.01 (br d,  $J = 7.7$  Hz, 1H, Ar), 7.12–7.18 (m, 4H, Ar), 7.23 (d,  $J = 7.4$  Hz, 2H, Ar);  $^{13}\text{C}$  NMR (76 MHz,  $\text{CDCl}_3$ )  $\delta$  13.6 ( $\text{CH}_3$ ), 20.7 ( $\text{CH}_3$ ), 21.5 ( $\text{CH}_2$ ), 22.3 ( $\text{CH}_2$ ), 30.4 ( $\text{CH}_2$ ), 31.3 ( $\text{CH}_2$ ), 34.0 ( $\text{CH}_2$ ), 35.8 ( $\text{CH}_2$ ), 79.5 (C), 93.2 (C), 123.1 (C), 125.6 (CH), 128.2 (2CH), 128.4 (3CH), 128.5 (CH), 132.6 (CH), 135.0 (C), 141.3 (C), 142.8 (C); HRMS-ESI  $m/z$  [ $\text{M}+\text{Na}$ ] $^+$  calcd for  $\text{C}_{22}\text{H}_{26}\text{Na}$ : 313.1927, found: 313.1927.

#### 1.4.6. 1-(3,3-Dimethylbut-1-yn-1-yl)-4-methyl-2-(4-phenylbutyl)benzene (9f).

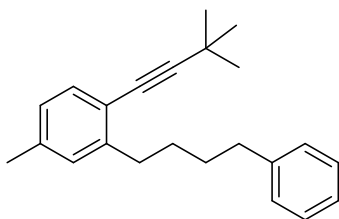

The title compound was synthesized using the same procedure described above. Yellow liquid:  $^1\text{H}$  NMR (500 MHz,  $\text{CDCl}_3$ )  $\delta$  1.22 (s, 9H, Me (*t*-Bu)), 1.58–1.63 (m, 4H,  $\text{CH}_2$ ), 2.21 (s, 3H, Me), 2.53–2.61 (m, 2H,  $\text{CH}_2$ ), 2.61–2.70 (m, 2H,  $\text{CH}_2$ ), 6.80–6.84 (m, 1H, Ar), 6.85–6.88 (m, 1H, Ar), 7.07–7.11 (m, 3H, Ar), 7.14–7.21 (m, 3H, Ar);  $^{13}\text{C}$  NMR (125 MHz,  $\text{CDCl}_3$ )  $\delta$  21.4 ( $\text{CH}_3$ ), 28.1 (C), 30.3 ( $\text{CH}_2$ ), 31.1 (3 $\text{CH}_3$ ), 31.6 ( $\text{CH}_2$ ), 34.7 ( $\text{CH}_2$ ), 36.0 ( $\text{CH}_2$ ), 77.8 (C), 101.2 (C), 120.2 (C), 125.6 (CH), 126.3 (CH), 128.2 (2CH), 128.4 (2CH), 129.5 (CH), 131.8 (CH), 137.3 (C), 142.7 (C), 144.2 (C); HRMS-ESI  $m/z$  [ $\text{M}+\text{Na}$ ] $^+$  calcd for  $\text{C}_{23}\text{H}_{28}$ : 327.2083, found: 327.2089.

#### 1.4.7. 4-Methyl-1-(pent-1-yn-1-yl)-2-(4-phenylbutyl)benzene (9g).

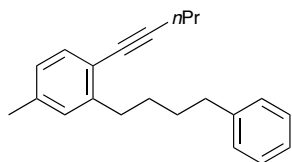

The title compound was synthesized using the same procedure described above.

Yellow liquid:  $^1\text{H}$  NMR (500 MHz,  $\text{CDCl}_3$ )  $\delta$  1.06 (t,  $J = 7.6$  Hz, 3H,  $\text{CH}_3$ ), 1.63 (sext,  $J = 7.6$  Hz, 2H,  $\text{CH}_2$ ), 1.68–1.72 (m, 4H,  $\text{CH}_2$ ), 2.31 (s, 3H, Me), 2.43 (t,  $J = 7.8$  Hz, 2H,  $\text{CH}_2$ ), 2.66 (t,  $J = 7.4$  Hz, 2H,  $\text{CH}_2$ ), 2.77 (t,  $J = 7.4$  Hz, 2H,  $\text{CH}_2$ ), 6.93

(dd,  $J = 1.4, 7.7$  Hz, 1H, Ar), 6.97 (br s,  $J = 7.7$  Hz, 1H, Ar), 7.17–7.20 (m, 3H, Ar), 7.26–7.30 (m, 3H, Ar);  $^{13}\text{C}$  NMR (125 MHz,  $\text{CDCl}_3$ )  $\delta$  13.6 ( $\text{CH}_3$ ), 21.4 ( $\text{CH}_3$ ), 21.5 ( $\text{CH}_2$ ), 22.4 ( $\text{CH}_2$ ), 30.3 ( $\text{CH}_2$ ), 31.4 ( $\text{CH}_2$ ), 34.4 ( $\text{CH}_2$ ), 35.9 ( $\text{CH}_2$ ), 79.4 (C), 92.8 (C), 120.3 (C), 125.6 (CH), 126.4 (CH), 128.2 (2CH), 128.4 (2CH), 129.4 (CH), 132.0 (CH), 137.4 (C), 142.8 (C), 144.2 (C); HRMS-ESI  $m/z$   $[\text{M}+\text{H}]^+$  calcd for  $\text{C}_{22}\text{H}_{27}$ : 291.2107, found: 291.2108.

### 1.5. Synthesis of alkylidenedibenzo[*a,d*]cycloheptenes, -octenes, and -nonenes

#### 1.5.1. 12-(2,2-Dimethylpropylidene)-5,6,7,12-tetrahydro-dibenzo[*a,d*]cyclooctene (2a) (Table 1, entry 4).

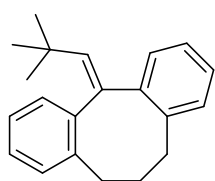

TfOH (8.8  $\mu\text{L}$ , 100  $\mu\text{mol}$ ) was added to a mixture of 1-(3,3-dimethylbut-1-yn-1-yl)-2-(3-phenylpropyl)benzene (**8a**) (30.0 mg, 109  $\mu\text{mol}$ ) in  $\text{CH}_2\text{Cl}_2$  (1 mL) at 0  $^\circ\text{C}$ . After being stirred at 0  $^\circ\text{C}$  for 10 min, the mixture was quenched with saturated aqueous  $\text{NaHCO}_3$  and extracted with ethyl acetate ( $3 \times 1$  mL). The

combined organic layers were washed with brine and dried over  $\text{Na}_2\text{SO}_4$  and evaporated. The residue was purified by silica gel column chromatography using ethyl acetate/hexane = 1/8 as an eluent to give **2a** as a colorless solid (29.8 mg, 108  $\mu\text{mol}$ , 99%): mp 53.3–53.6  $^\circ\text{C}$ ;  $^1\text{H}$  NMR (500 MHz,  $\text{CDCl}_3$ )  $\delta$  0.96 (s, 9H,  $\text{CH}_3$  (*t*-Bu)), 1.36–2.44 (m, 2H,  $\text{CH}_2$ ), 2.49–3.49 (m, 4H,  $\text{CH}_2$ ), 5.62 (s, 1H, CH (vinyl)), 6.93–7.17 (m, 7H, Ar), 7.23 (d,  $J = 7.1$  Hz, 1H, Ar);  $^{13}\text{C}$  NMR (125 MHz,  $\text{CDCl}_3$ )  $\delta$  28.9 (C), 30.6 (3 $\text{CH}_3$ ), 34.1 ( $\text{CH}_2$ ), 36.0–38.5 (2 $\text{CH}_2$ ), 125.7 (CH), 126.2 (CH), 126.6 (CH), 126.7 (CH), 128.4 (CH), 128.7 (CH), 129.6 (CH), 129.9 (CH), 139.3 (CH), 140.0 (C), 140.1 (C), 141.9 (C), 146.4 (2C); HRMS-ESI  $m/z$   $[\text{M}+\text{Na}]^+$  calcd for  $\text{C}_{21}\text{H}_{24}\text{Na}$ : 299.1770, found: 299.1771.

#### 1.5.2. 5,6,7,12-Tetrahydro-12-(2-methylpropylidene)-dibenzo[*a,d*]cyclooctene (2b) (Table 2, entry 1).

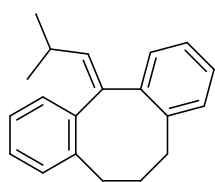

The title compound was synthesized using the same procedure described above. Yellow liquid:  $^1\text{H}$  NMR (600 MHz,  $\text{CDCl}_3$ , 320K)  $\delta$  0.96 (d,  $J = 6.8$  Hz, 6H,  $\text{CH}_3$  (*i*-Pr)), 1.97 (app. br s, 2H,  $\text{CH}_2$ ), 2.05–2.15 (m, 1H, CH (*i*-Pr)), 2.66 (app. br s, 2H,  $\text{CH}_2$ ), 2.91 (t,  $J = 6.5$  Hz, 2H,  $\text{CH}_2$ ), 5.60 (d,  $J = 9.7$  Hz, 1H, CH (vinyl)), 7.00 (d,  $J = 7.2$  Hz, 1H, Ar),

7.05–7.16 (m, 6H, Ar), 7.33 (d,  $J = 7.6$  Hz, 1H, Ar);  $^{13}\text{C}$  NMR (150 MHz,  $\text{CDCl}_3$ , 320K)  $\delta$  22.8 (2 $\text{CH}_3$ ), 28.5 (CH), 29.5 ( $\text{CH}_2$ ), 34.7–35.5 (2 $\text{CH}_2$ ), 126.1 (CH), 126.2 (CH), 126.8 (CH), 127.1 (CH), 128.3 (CH), 128.4 (CH), 129.1 (CH), 130.5 (CH), 138.5 (CH), 140.2 (C), 140.4 (C), 140.7 (C), 141.0 (C), 143.5 (C); HRMS-EI  $m/z$   $[\text{M}]^+$  calcd for  $\text{C}_{20}\text{H}_{22}$ : 262.1722, found: 262.1719.

#### 1.5.3. 12-Butylidene-5,6,7,12-tetrahydrodibenzo[*a,d*]cyclooctene (2c) (Table 2, entry 2).

The title compound was synthesized using the same procedure described above. Colorless liquid:  $^1\text{H}$  NMR

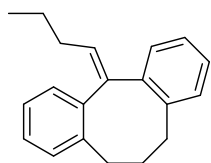

(400 MHz,  $\text{CDCl}_3$ )  $\delta$  0.88 (t,  $J = 7.3$  Hz, 3H,  $\text{CH}_3$  (*n*-Pr)), 1.41 (sext,  $J = 7.3$  Hz, 2H,  $\text{CH}_2$  (*n*-Pr)), 1.84 (quint,  $J = 7.3$  Hz, 2H,  $\text{CH}_2$  (*n*-Pr)), 1.96 (app. br s, 2H,  $\text{CH}_2$ ), 2.66 (app. br s, 2H,  $\text{CH}_2$ ), 2.88 (t,  $J = 6.4$  Hz, 2H,  $\text{CH}_2$ ), 5.81 (t,  $J = 7.2$  Hz, 1H, CH (vinyl)), 7.01 (dd,  $J = 1.2, 7.5$  Hz, 1H, Ar), 7.05–7.18 (m, 6H, Ar), 7.35 (d,  $J = 7.6$  Hz, 1H, Ar);

$^{13}\text{C}$  NMR (150 MHz,  $\text{CDCl}_3$ , 332K)  $\delta$  13.9 ( $\text{CH}_3$ ), 22.6 ( $\text{CH}_2$ ), 29.5 ( $\text{CH}_2$ ), 31.3 ( $\text{CH}_2$ ), 34.8 ( $\text{CH}_2$ ), 35.2 ( $\text{CH}_2$ ), 126.2 (CH), 126.3 (CH), 126.8 (CH), 127.1 (CH), 128.2 (CH), 128.4 (CH), 129.1 (CH), 130.5 (CH), 131.2 (CH), 140.3 (C), 140.5 (C), 140.9 (C), 143.2 (C), 143.8 (C); HRMS-EI  $m/z$   $[\text{M}]^+$  calcd for  $\text{C}_{20}\text{H}_{22}$ : 262.1722, found: 262.1721.

#### 1.5.4. 12-Methylene-5,6,7,12-tetrahydrodibenzo[*a,d*]cyclooctene (2e') (Table 2, entry 4).

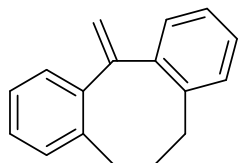

The title compound was synthesized using the same procedure described above.

Colorless liquid:  $^1\text{H}$  NMR (600 MHz,  $\text{CDCl}_3$ , 323K)  $\delta$  1.82 (quint,  $J = 6.3$  Hz, 2H,  $\text{CH}_2$ ), 2.62 (t,  $J = 6.3$  Hz, 4H,  $\text{CH}_2$ ), 5.47 (s, 2H,  $\text{C}=\text{CH}_2$ ), 7.05 (dd,  $J = 2.0, 6.7$  Hz, 2H, Ar), 7.17–7.23 (m, 4H, Ar), 7.49 (dd,  $J = 1.4, 7.2$  Hz, 2H, Ar);  $^{13}\text{C}$  NMR (150 MHz,  $\text{CDCl}_3$ ,

323K)  $\delta$  31.4 ( $\text{CH}_2$ ), 32.1 (2 $\text{CH}_2$ ), 118.8 ( $\text{CH}_2$ ), 126.2 (2CH), 127.8 (2CH), 128.0 (2CH), 129.8 (2CH), 139.7 (2C), 141.7 (2C), 150.5 (C); HRMS-EI  $m/z$   $[\text{M}]^+$  calcd for  $\text{C}_{17}\text{H}_{16}$ : 220.1252, found: 220.1247.

#### 1.5.5. 5-(Butylidene)-10,11-dihydro-5*H*-dibenzo[*a,d*]cycloheptene (1d) (Table 2, entry 6).

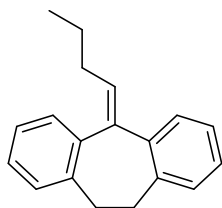

To a mixture of 1-(pent-1-yn-1-yl)-2-phenethylbenzene (**7d**) (24.8 mg, 100  $\mu\text{mol}$ ) in  $\text{CH}_2\text{Cl}_2$  (1 mL) at 0  $^\circ\text{C}$  was added TfOH (8.8  $\mu\text{L}$ , 100  $\mu\text{mol}$ ). The mixture was stirred at 0  $^\circ\text{C}$  for 15 min, quenched with saturated aqueous  $\text{NaHCO}_3$ , and then extracted with ethyl acetate (3  $\times$  1.0 mL). The combined organic layers were washed with brine and dried over  $\text{Na}_2\text{SO}_4$ , and evaporated. The residue was purified by silica gel column

chromatography using ethyl acetate/hexane = 1/8 as an eluent to give 5-(butylidene)-10,11-dihydro-5*H*-dibenzo[*a,d*]cycloheptene (**1d**) as a colorless liquid (23.9 mg, 96.2  $\mu\text{mol}$ , 96%):  $^1\text{H}$  NMR (600 MHz,  $\text{CDCl}_3$ )  $\delta$  0.88 (t,  $J = 7.4$  Hz, 3H,  $\text{CH}_3$  (*n*-Pr)), 1.43 (app. br s, 2H,  $\text{CH}_2$  (*n*-Pr)), 2.06 (app. br s, 1H,  $\text{CH}_2$ ), 2.11 (app. br s, 1H,  $\text{CH}_2$ ), 2.77 (app. br s, 1H,  $\text{CH}_2$ ), 2.95 (app. br s, 1H,  $\text{CH}_2$ ), 3.31 (app. br s, 1H,  $\text{CH}_2$ ), 3.40 (app. br s, 1H,  $\text{CH}_2$ ), 5.86 (t,  $J = 7.4$  Hz, 1H, CH (vinyl)), 7.02–7.05 (m, 1H, Ar), 7.10–7.21 (m, 6H, Ar), 7.26–7.30 (m, 1H, Ar);  $^{13}\text{C}$  NMR (150 MHz,  $\text{CDCl}_3$ , 323K)  $\delta$  13.8 ( $\text{CH}_3$ ), 23.0 ( $\text{CH}_2$ ), 31.5 ( $\text{CH}_2$ ), 32.1 ( $\text{CH}_2$ ), 33.8 ( $\text{CH}_2$ ), 125.6 (CH), 126.0 (CH), 126.9 (CH), 127.2 (CH), 127.9 (CH), 128.4 (CH), 128.6 (CH), 129.9 (CH), 132.2 (CH), 137.1 (C), 139.3 (C), 140.3 (C), 141.6 (C), 142.3 (C); HRMS-EI  $m/z$   $[\text{M}]^+$  calcd for  $\text{C}_{19}\text{H}_{20}$ : 248.1565, found: 248.1566.

#### 1.5.6. 5-(2,2-Dimethylpropylidene)-10,11-dihydro-5*H*-dibenzo[*a,d*]cycloheptene (1c) (Table 2, entry 5).

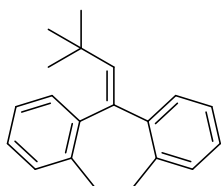

The title compound was synthesized using the same procedure described above.

Colorless liquid:  $^1\text{H}$  NMR (300 MHz,  $\text{CDCl}_3$ )  $\delta$  0.98 (s, 9H,  $\text{CH}_3$  (*t*-Bu)), 2.72 (dt,  $J = 4.2, 13.6$  Hz, 1H,  $\text{CH}_2$ ), 2.93 (ddd,  $J = 4.1, 13.4, 17.3$  Hz, 1H,  $\text{CH}_2$ ), 3.30 (dt,  $J = 4.2, 17.3$  Hz, 1H,  $\text{CH}_2$ ), 3.52 (td,  $J = 3.9, 13.3$  Hz, 1H,  $\text{CH}_2$ ), 5.78 (s, 1H, CH (vinyl)), 6.93–

7.01 (m, 1H, Ar), 7.07–7.28 (m, 7H, Ar);  $^{13}\text{C}$  NMR (75.5 MHz,  $\text{CDCl}_3$ )  $\delta$  31.0 (3 $\text{CH}_3$ ), 31.6 ( $\text{CH}_2$ ), 33.7

(CH<sub>2</sub>), 33.8 (C), 125.3 (CH), 125.9 (CH), 126.7 (CH), 127.1 (CH), 127.3 (CH), 128.2 (CH), 128.3 (CH), 130.3 (CH), 136.2 (C), 138.7 (C), 139.9 (C), 141.5 (CH), 141.8 (C), 142.8 (C); HRMS-ESI *m/z* [M+Na]<sup>+</sup> calcd for C<sub>20</sub>H<sub>22</sub>Na: 285.1614, found: 285.1609.

### 1.5.7. 5-Methylene-10,11-dihydro-5*H*-dibenzo[*a,d*]cycloheptene (1e') (Table 2, entry 7).

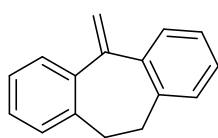

The title compound was synthesized using the same procedure described above. <sup>1</sup>H NMR and <sup>13</sup>C NMR spectra were identical to those in the literature.<sup>4</sup>

### 1.5.8. 3-(10,11-Dihydro-5*H*-dibenzo[*a,d*][7]annulen-5-ylidene)-*N,N*-dimethylpropan-1-amine (1a) (Table 2, entry 8).

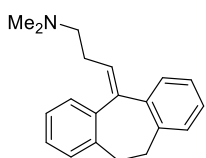

To a mixture of *N,N*-dimethyl-4-(2-phenethylphenyl)but-3-yn-1-amine (**7a**) (13.8 mg, 49.7 μmol) in CH<sub>2</sub>Cl<sub>2</sub> (0.5 mL) at 0 °C was added TfOH (21.9 μL, 250 μmol). The mixture was stirred at 0 °C for 10 min, quenched with saturated aqueous NaHCO<sub>3</sub>, and extracted with ethyl acetate (3 × 1.0 mL). The combined organic layers were washed with brine, dried over Na<sub>2</sub>SO<sub>4</sub>, and evaporated. The residue was purified by silica gel column chromatography using chloroform/methanol = 1/1 to give 3-(10,11-dihydro-5*H*-dibenzo[*a,d*][7]annulen-5-ylidene)-*N,N*-dimethylpropan-1-amine (**1a**) as a colorless liquid (7.7 mg, 27.8 μmol, 56%): <sup>1</sup>H NMR (600 MHz, CDCl<sub>3</sub>) δ 2.20 (s, 6H, CH<sub>3</sub> (NMe<sub>2</sub>)), 2.28–2.46 (m, 4H, CH<sub>2</sub>), 2.71–2.86 (m, 1H, CH<sub>2</sub>), 2.91–3.07 (m, 1H, CH<sub>2</sub>), 3.26–3.38 (m, 1H, CH<sub>2</sub>), 3.38–3.51 (m, 1H, CH<sub>2</sub>), 5.88 (t, *J* = 7.2 Hz, 1H, CH (vinyl)), 7.02–7.07 (m, 1H, Ar), 7.13–7.23 (m, 6H, Ar), 7.28–7.32 (m, 1H, Ar). <sup>1</sup>H NMR and <sup>13</sup>C NMR spectra were identical to those in the literature.<sup>5</sup>

### 1.5.9. 3-(10,11-Dihydro-5*H*-dibenzo[*a,d*][7]annulen-5-ylidene)-*N*-methylpropan-1-amine (1b) (Table 2, entry 9).

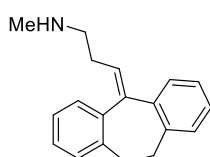

To a mixture of *N*-methyl-4-(2-phenethylphenyl)but-3-yn-1-amine (**7b**) (6.5 mg, 24.7 μmol) in CH<sub>2</sub>Cl<sub>2</sub> (0.25 mL) at 0 °C was added TfOH (10.8 μL, 124 μmol). The mixture was then stirred at 0 °C for 10 min, quenched with saturated aqueous NaHCO<sub>3</sub>, and then extracted with ethyl acetate (3 × 1.0 mL). The combined organic layers were washed with brine, dried over Na<sub>2</sub>SO<sub>4</sub>, and evaporated. The residue was purified by PTLC using chloroform/methanol = 1/1 as an eluent to give 3-(10,11-dihydro-5*H*-dibenzo[*a,d*][7]annulen-5-ylidene)-*N*-methylpropan-1-amine (**1b**) as a colorless liquid (4.4 mg, 16.7 μmol, 68%): IR (neat) 3417 cm<sup>-1</sup>; <sup>1</sup>H NMR (600 MHz, CDCl<sub>3</sub>) δ 2.02–2.16 (m, 1H, NH), 2.34 (q, *J* = 7.2 Hz, 2H, CH<sub>2</sub>), 2.37 (s, 3H, CH<sub>3</sub> (NHMe)), 2.64–2.72 (m, 2H, CH<sub>2</sub>), 2.74–2.86 (m, 1H, CH<sub>2</sub>), 2.89–3.06 (m, 1H, CH<sub>2</sub>), 3.27–3.46 (m, 2H, CH<sub>2</sub>), 5.85 (t, *J* = 7.7 Hz, 1H, CH (vinyl)), 7.02–7.06 (m, 1H, Ar), 7.11–7.21 (m, 6H, Ar), 7.27–7.30 (m, 1H, Ar).

### 1.5.10. 3-(10,11-Dihydro-5*H*-dibenzo[*a,d*][7]annulen-5-ylidene)propan-1-ol (1f) (Table 2, entry 10).

<sup>4</sup> G. A. Molander and E. D. Dowdy, *J. Org. Chem.*, 1999, **64**, 6515.

<sup>5</sup> S. Das, F. D. Bobbink, G. Laurency and P. J. Dyson, *Angew. Chem., Int. Ed.*, 2014, **53**, 12876.

The title compound was synthesized using the same procedure described above. Colorless solid: mp 81.5–81.8 °C; IR (KBr) 3394 cm<sup>-1</sup>; <sup>1</sup>H NMR (500 MHz, CDCl<sub>3</sub>) δ 1.30 (app. br s, 1H, OH), 2.36–2.46 (m, 2H, CH<sub>2</sub>), 2.67–3.10 (m, 2H, CH<sub>2</sub>), 3.20–3.52 (m, 2H, CH<sub>2</sub>), 3.69 (app. br s, 2H, CH<sub>2</sub>), 5.89 (t, *J* = 7.5 Hz, 1H, CH (vinyl)), 7.02–7.06 (m, 1H, Ar), 7.12–7.22 (m, 6H, Ar), 7.28–7.30 (m, 1H, Ar); <sup>13</sup>C NMR (125 MHz, CDCl<sub>3</sub>) δ 32.0 (CH<sub>2</sub>), 33.1 (CH<sub>2</sub>), 33.7 (CH<sub>2</sub>), 62.6 (CH<sub>2</sub>), 125.8 (CH), 126.0 (CH), 127.2 (CH), 127.4 (CH), 127.5 (CH), 128.1 (CH), 128.3 (CH), 128.5 (CH), 130.0 (CH), 137.0 (C), 139.3 (C), 139.9 (C), 141.1 (C), 145.2 (C); HRMS-ESI *m/z* [M+Na]<sup>+</sup> calcd for C<sub>18</sub>H<sub>18</sub>ONa: 273.1250, found: 273.1252.

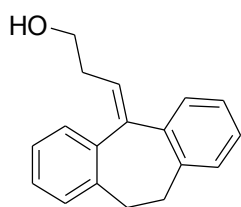

**1.5.11. 3-(6,7-Dihydrodibenzo[*a,d*][8]annulen-12(5*H*)-ylidene)-*N,N*-dimethylpropan-1-amine (2f) (Table 2, entry 11).**

The title compound was synthesized using the same procedure described above. Yellow liquid: <sup>1</sup>H NMR (600 MHz, CDCl<sub>3</sub>, 323K) δ 1.96 (app. br s, 2H, CH<sub>2</sub>), 2.02 (q, *J* = 7.4 Hz, 2H, CH<sub>2</sub>), 2.15 (s, 6H, CH<sub>3</sub> (NMe<sub>2</sub>)), 2.34 (t, *J* = 7.7 Hz, 2H, CH<sub>2</sub>), 2.63 (app. br s, 2H, CH<sub>2</sub>), 2.88 (t, *J* = 6.6 Hz, 2H, CH<sub>2</sub>), 5.83 (t, *J* = 7.2 Hz, 1H, CH (vinyl)), 6.99 (d, *J* = 7.4 Hz, 1H, Ar), 7.04–7.17 (m, 6H, Ar), 7.35 (d, *J* = 7.4 Hz, 1H, Ar); <sup>13</sup>C NMR (150 MHz, CDCl<sub>3</sub>, 323 K) δ 27.6 (CH<sub>2</sub>), 29.6 (CH<sub>2</sub>), 34.6 (CH<sub>2</sub>), 34.9 (CH<sub>2</sub>), 45.2 (2CH<sub>3</sub>), 59.2 (CH<sub>2</sub>), 126.2 (2CH), 126.9 (CH), 127.2 (CH), 128.2 (CH), 128.2 (CH), 128.8 (CH), 129.1 (CH), 130.6 (CH), 140.1 (C), 140.4 (C), 140.6 (C), 143.4 (C), 144.4 (C); HRMS-ESI *m/z* [M+H]<sup>+</sup> calcd for C<sub>21</sub>H<sub>26</sub>N: 292.2060, found: 292.2060.

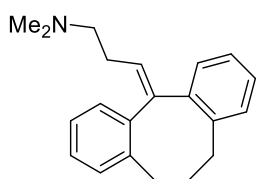

**1.5.12. 3-(6,7-Dihydrodibenzo[*a,d*][8]annulen-12(5*H*)-ylidene)propan-1-ol (2g) (Table 2, entry 12).**

The title compound was synthesized using the same procedure described above. Colorless liquid: <sup>1</sup>H NMR (400 MHz, CDCl<sub>3</sub>) δ 1.18–1.25 (m, 1H, OH), 1.84–2.08 (m, 2H, CH<sub>2</sub>), 2.15 (q, *J* = 6.8 Hz, 2H, CH<sub>2</sub>), 2.54–2.75 (m, 2H, CH<sub>2</sub>), 2.88 (t, *J* = 6.6 Hz, 2H, CH<sub>2</sub>), 3.67 (t, *J* = 6.6 Hz, 2H, CH<sub>2</sub>), 5.87 (t, *J* = 7.3 Hz, 1H, CH (vinyl)), 7.02 (dd, *J* = 1.3, 7.5 Hz, 1H, Ar), 7.06–7.19 (m, 6H, Ar), 7.37 (d, *J* = 7.2 Hz, 1H, Ar); <sup>13</sup>C NMR (150 MHz, CDCl<sub>3</sub>, 322 K) δ 29.5 (CH<sub>2</sub>), 33.0 (CH<sub>2</sub>), 34.7 (CH<sub>2</sub>), 35.1 (CH<sub>2</sub>), 62.4 (CH<sub>2</sub>), 126.3 (CH), 126.3 (CH), 126.9 (CH), 127.1 (CH), 127.4 (CH), 128.1 (CH), 128.3 (CH), 129.2 (CH), 130.6 (CH), 140.1 (C), 140.4 (C), 140.4 (C), 143.3 (C), 145.9 (C); HRMS-ESI *m/z* [M+H]<sup>+</sup> calcd for C<sub>19</sub>H<sub>21</sub>O: 265.1592, found: 265.1588.

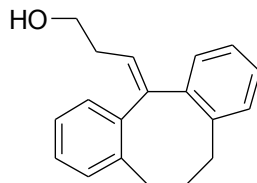

**1.5.13. 3-(6,7-Dihydrodibenzo[*a,d*][8]annulen-12(5*H*)-ylidene)propan-1-amine (2h) (Table 2, entry 13).**

The title compound was synthesized using the same procedure described above. Colorless liquid: IR (neat) 3502 cm<sup>-1</sup>; <sup>1</sup>H NMR (600 MHz, CDCl<sub>3</sub>, 322 K) δ 1.87 (app. br s, 2H, CH<sub>2</sub>), 2.08 (q, *J* = 7.1 Hz, 2H, CH<sub>2</sub>), 2.54 (app. br s, 2H, CH<sub>2</sub>), 2.75 (t, *J* = 6.4 Hz, 2H, CH<sub>2</sub>), 2.82 (app. br s, 2H, CH<sub>2</sub>), 5.22 (app. br s, 2H, NH<sub>2</sub>), 5.67 (t, *J* = 7.0 Hz, 1H, CH (vinyl)), 6.91 (d, *J* = 7.2 Hz, 1H, Ar), 6.93–6.97 (m, 1H, Ar), 6.99–7.08 (m, 5H, Ar), 7.29 (d, *J* = 7.5 Hz, 1H, Ar); <sup>13</sup>C NMR (150 MHz, CDCl<sub>3</sub>, 322 K) δ 28.2 (CH<sub>2</sub>), 29.6 (CH<sub>2</sub>), 34.6 (CH<sub>2</sub>), 34.9 (CH<sub>2</sub>), 40.2

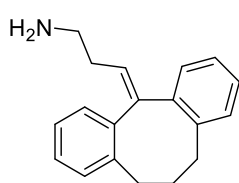

(CH<sub>2</sub>), 124.3 (CH), 126.4 (CH), 126.6 (CH), 127.4 (CH), 127.7 (CH), 127.8 (CH), 128.1 (CH), 129.3 (CH), 130.7 (CH), 139.7 (C), 139.8 (C), 140.3 (C), 142.6 (C), 147.8 (C); HRMS-ESI  $m/z$  [M+H]<sup>+</sup> calcd for C<sub>19</sub>H<sub>22</sub>N: 264.1747, found: 264.1742.

**1.5.14. (E)-12-(2,2-Dimethylpropylidene)-2-methyl-5,6,7,12-tetrahydrodibenzo[*a,d*]cyclooctene (E-2j) (Table 3, entry 7).**

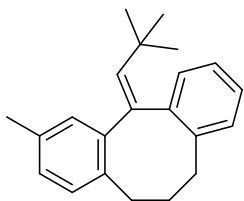

To a mixture of 1-(3,3-dimethylbut-1-yn-1-yl)-2-(3-(*p*-tolyl)propyl)benzene (**8l**) (29.0 mg, 100 μmol) in CH<sub>2</sub>Cl<sub>2</sub> (1 mL) at 0 °C was added H<sub>2</sub>SO<sub>4</sub> (9.8 μL, 100 μmol). The mixture was then stirred at 0 °C for 20 min, quenched with saturated aqueous NaHCO<sub>3</sub>, and then extracted with ethyl acetate (3 × 1 mL). The combined organic layers were washed with brine, dried over Na<sub>2</sub>SO<sub>4</sub>, and evaporated. The residue was purified by silica gel column chromatography using ethyl acetate/hexane = 1/8 as an eluent to give **E-2j** as a colorless liquid (24.9 mg, 85.7 μmol, 86%): <sup>1</sup>H NMR (600 MHz, CDCl<sub>3</sub>, 322 K) δ 0.96 (s, 9H, CH<sub>3</sub> (*t*-Bu)), 1.41–2.20 (m, 2H, CH<sub>2</sub>), 2.25 (s, 3H, CH<sub>3</sub> (*p*-tol)), 2.57–3.29 (m, 4H, CH<sub>2</sub>), 5.61 (s, 1H, CH (vinyl)), 6.81–6.87 (m, 2H, Ar), 6.96–7.01 (m, 1H, Ar), 7.02–7.07 (m, 3H, Ar), 7.10–7.14 (m, 1H, Ar); <sup>13</sup>C NMR (150 MHz, CDCl<sub>3</sub>, 322 K) δ 20.9 (3CH<sub>3</sub>), 29.3 (CH<sub>2</sub>), 30.7 (CH<sub>3</sub>), 34.2 (C), 36.3 (CH<sub>2</sub>), 37.3 (CH<sub>2</sub>), 125.7 (CH), 126.8 (CH), 127.3 (CH), 128.9 (CH), 129.2 (CH), 129.6 (CH), 130.0 (CH), 135.6 (C), 137.1 (C), 139.4 (CH), 139.8 (C), 140.2 (C), 142.0 (C), 146.3 (C); HRMS-EI  $m/z$  [M]<sup>+</sup> calcd for C<sub>22</sub>H<sub>26</sub>: 290.2035, found: 290.2035.

**1.5.15. (Z)-12-(2,2-Dimethylpropylidene)-2-methyl-5,6,7,12-tetrahydro-dibenzo[*a,d*]cyclooctene (Z-2j) (Table 3, entry 6).**

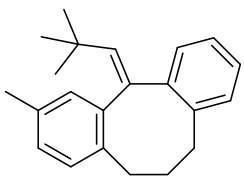

The title compound was synthesized using the same procedure described above. Colorless solid: mp 49.7–50.2 °C: <sup>1</sup>H NMR (400 MHz, CDCl<sub>3</sub>) δ 0.97 (s, 9H, CH<sub>3</sub> (*t*-Bu)), 1.49–2.22 (m, 2H, CH<sub>2</sub>), 2.25 (s, 3H, CH<sub>3</sub> (*p*-tol)), 2.52–3.35 (m, 4H, CH<sub>2</sub>), 5.60 (s, 1H, CH (vinyl)), 6.87 (d, *J* = 7.4 Hz, 1H, Ar), 6.90 (d, *J* = 7.5, 1H, Ar), 6.93 (s, 1H, Ar), 6.98 (dd, *J* = 1.3, 7.3 Hz, 1H, Ar), 7.04 (ddd, *J* = 1.5, 7.2, 7.5 Hz, 1H, Ar), 7.10 (ddd, *J* = 1.5, 7.2, 7.5 Hz, 1H, Ar), 7.22 (d, *J* = 7.3 Hz, 1H, Ar); <sup>13</sup>C NMR (150 MHz, CDCl<sub>3</sub>, 341 K) δ 20.7 (3CH<sub>3</sub>), 28.8 (CH<sub>2</sub>), 30.4 (CH<sub>3</sub>), 33.9 (C), 36.5 (CH<sub>2</sub>), 36.6 (CH<sub>2</sub>), 125.9 (CH), 126.4 (CH), 127.2 (CH), 128.3 (CH), 129.3 (CH), 129.3 (CH), 129.7 (CH), 134.8 (C), 136.8 (C), 139.2 (CH), 139.6 (C), 140.0 (C), 141.5 (C), 146.3 (C); HRMS-EI  $m/z$  [M]<sup>+</sup> calcd for C<sub>22</sub>H<sub>26</sub>: 290.2035, found: 290.2031.

**1.5.16. (Z)-12-(2,2-Dimethylpropylidene)-2-methoxy-5,6,7,12-tetrahydrodibenzo[*a,d*]cyclooctene (Z-2i) (Table 3, entry 2).**

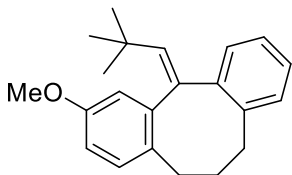

The title compound was synthesized using the same procedure described above. Colorless liquid: <sup>1</sup>H NMR (600 MHz, CDCl<sub>3</sub>) δ 0.92 (s, 9H, CH<sub>3</sub> (*t*-Bu)), 1.29–2.38 (m, 2H, CH<sub>2</sub>), 2.44–3.22 (m, 4H, CH<sub>2</sub> (Bn)), 3.67 (s, 3H, OMe), 5.52 (s, 1H, CH (vinyl)), 6.54 (dd, *J* = 2.7, 8.4 Hz, 1H, Ar), 6.63 (d, *J* = 2.4 Hz, 1H, Ar), 6.86 (d, *J* = 8.3 Hz, 1H, Ar), 6.92 (dd, *J* = 1.3, 7.6 Hz, 1H, Ar), 6.98 (td, *J* = 1.4, 7.4 Hz, 1H, Ar), 7.03 (td, *J* = 1.3, 7.4 Hz, 1H, Ar), 7.14 (d, *J* = 7.2 Hz, 1H, Ar); <sup>13</sup>C NMR (150 MHz, CDCl<sub>3</sub>) δ 29.1 (C), 30.4 (3CH<sub>3</sub>), 33.9 (CH<sub>2</sub>), 36.4 (CH<sub>2</sub>), 36.5 (CH<sub>2</sub>), 55.0 (CH<sub>3</sub>), 111.5 (CH), 114.6 (CH), 125.9 (CH), 126.4 (CH), 128.4 (CH), 129.7

(CH), 130.3 (CH), 132.4 (C), 139.2 (CH), 139.3 (C), 140.1 (C), 142.8 (C), 146.0 (C), 157.4 (C); HRMS-EI  $m/z$   $[M]^+$  calcd for C<sub>22</sub>H<sub>26</sub>O: 306.1984, found: 306.1982.

**1.5.17. (E)-12-(2,2-Dimethylpropylidene)-2-methoxy-5,6,7,12-tetrahydro-dibenzo[*a,d*]cyclooctene (E-2i) (Table 3, entry 4).**

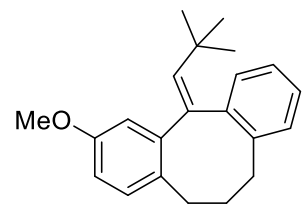

The title compound was synthesized using the same procedure described above. Yellow liquid: <sup>1</sup>H NMR (600 MHz, CDCl<sub>3</sub>)  $\delta$  0.98 (s, 9H, CH<sub>3</sub> (*t*-Bu)), 2.00–2.41 (m, 1H, CH<sub>2</sub>), 2.41–3.40 (m, 5H, CH<sub>2</sub>), 3.79 (s, 3H, OMe), 5.65 (s, 1H, CH (vinyl)), 6.62 (dd,  $J$  = 2.9, 8.5 Hz, 1H, Ar), 6.82 (s, 1H, Ar), 6.94 (d,  $J$  = 8.2 Hz, 1H, Ar), 7.10 (m, 4H, Ar); <sup>13</sup>C NMR (150 MHz, CDCl<sub>3</sub>, 323 K)  $\delta$  29.2 (C), 30.4 (3CH<sub>3</sub>), 33.9 (CH<sub>2</sub>), 35.7 (CH<sub>2</sub>), 37.1 (CH<sub>2</sub>), 55.1 (CH<sub>3</sub>), 111.1 (CH), 114.6 (CH), 125.5 (CH), 126.7 (CH), 128.7 (CH), 129.4 (CH), 130.7 (CH), 132.3 (C), 139.3 (C), 139.4 (CH), 140.1 (C), 141.5 (C), 147.3 (C), 157.8 (C); HRMS-EI  $m/z$   $[M]^+$  calcd for C<sub>22</sub>H<sub>26</sub>O: 306.1984, found: 306.1982.

**1.5.18. (E)-5-(2,2-Dimethylpropylidene)-10,11-dihydro-3-methyl-5H-dibenzo[*a,d*]cycloheptene (E-1g) (Table 3, entry 9).**

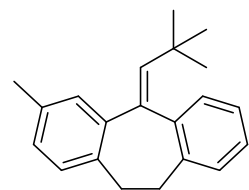

The title compound was synthesized using the same procedure described above. Colorless liquid: mp 82.6–83.0 °C; <sup>1</sup>H NMR (400 MHz, CDCl<sub>3</sub>)  $\delta$  0.98 (s, 9H, CH<sub>3</sub> (*t*-Bu)), 2.29 (s, 3H, CH<sub>3</sub> (*p*-tol)), 2.70 (dt,  $J$  = 4.4, 13.6 Hz, 1H, CH<sub>2</sub>), 2.88 (ddd,  $J$  = 4.3, 13.2, 17.1 Hz, 1H, CH<sub>2</sub>), 3.25 (dt,  $J$  = 4.4, 17.1 Hz, 1H, CH<sub>2</sub>), 3.49 (td,  $J$  = 4.3, 13.6 Hz, 1H, CH<sub>2</sub>), 5.77 (s, 1H, CH (vinyl)), 6.86 (d,  $J$  = 8.1 Hz, 1H, Ar), 6.91 (dd,  $J$  = 1.7, 7.8 Hz, 1H, Ar), 7.04–7.21 (m, 5H, Ar); <sup>13</sup>C NMR (125 MHz, CDCl<sub>3</sub>)  $\delta$  20.8 (CH<sub>3</sub>), 31.1 (3CH<sub>3</sub>), 31.7 (CH<sub>2</sub>), 33.2 (CH<sub>2</sub>), 33.8 (C), 125.3 (CH), 127.1 (CH), 127.2 (CH), 127.5 (CH), 128.1 (CH), 128.8 (CH), 130.3 (CH), 133.1 (C), 135.3 (C), 138.8 (C), 140.0 (C), 141.2 (CH), 141.9 (C), 142.5 (C); HRMS-EI  $m/z$   $[M]^+$  calcd for C<sub>21</sub>H<sub>24</sub>: 276.1878, found: 276.1881.

**1.5.19. 10,11-Dihydro-5-methylene-3-(trifluoromethyl)-5H-dibenzo[*a,d*]cycloheptene (1h') (Table 3, entry 10).**

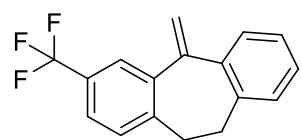

The title compound was synthesized using the same procedure described above. Colorless liquid: <sup>1</sup>H NMR (600 MHz, CDCl<sub>3</sub>)  $\delta$  3.15–3.19 (m, 2H, CH<sub>2</sub>), 3.19–3.22 (m, 2H, CH<sub>2</sub>), 5.47 (d,  $J$  = 1.2 Hz, 1H, C=CH<sub>2</sub>), 5.51 (d,  $J$  = 1.2 Hz, 1H, C=CH<sub>2</sub>), 7.14 (d,  $J$  = 7.1 Hz, 1H, Ar), 7.19–7.26 (m, 3H, Ar), 7.37 (dd,  $J$  = 1.4, 7.4 Hz, 1H, Ar), 7.46 (d,  $J$  = 8.5 Hz, 1H, Ar), 7.61 (s, 1H, Ar); <sup>13</sup>C NMR (150 MHz, CDCl<sub>3</sub>)  $\delta$  32.8 (CH<sub>2</sub>), 33.1 (CH<sub>2</sub>), 118.7 (CH<sub>2</sub>), 124.2 (q, <sup>1</sup> $J$  = 272.0 Hz, CF<sub>3</sub>), 124.3 (q, <sup>3</sup> $J$  = 4.1 Hz, CH), 124.9 (q, <sup>3</sup> $J$  = 4.1 Hz, CH), 126.5 (CH), 128.0 (CH), 128.3 (CH), 128.6 (q, <sup>2</sup> $J$  = 20.9 Hz, C), 129.0 (CH), 129.3 (CH), 137.8 (C), 140.2 (C), 141.8 (C), 142.4 (C), 150.6 (C); HRMS-EI  $m/z$   $[M]^+$  calcd for C<sub>17</sub>H<sub>13</sub>F<sub>3</sub>: 274.0969, found: 274.0965.

**1.5.20. (E)-5-(2,2-Dimethylpropylidene)-10,11-dihydro-3-(trifluoromethyl)-5H-dibenzo[*a,d*]cycloheptene (E-1h) (Table 3, entry 10).**

Light yellow liquid: <sup>1</sup>H NMR (500 MHz, CDCl<sub>3</sub>)  $\delta$  0.99 (s, 9H, CH<sub>3</sub> (*t*-Bu)), 2.75 (dt,  $J$  = 4.3, 13.8 Hz, 1H,

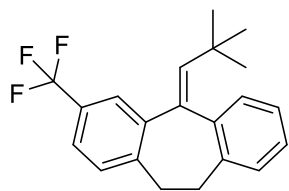

CH<sub>2</sub>), 2.96 (td,  $J = 4.3, 15.6$  Hz, 1H, CH<sub>2</sub>), 3.34 (dd,  $J = 4.3, 17.3$  Hz, 1H, CH<sub>2</sub>), 3.52 (td,  $J = 4.3, 13.8$  Hz, 1H, CH<sub>2</sub>), 5.81 (s, 1H, CH (vinyl)), 7.07 (d,  $J = 8.1$  Hz, 1H, Ar), 7.12–7.20 (m, 4H, Ar), 7.32 (dd,  $J = 1.5, 8.1$  Hz, 1H, Ar), 7.48 (s, 1H, Ar); <sup>13</sup>C NMR (150 MHz, CDCl<sub>3</sub>)  $\delta$  30.9 (3CH<sub>3</sub>), 31.2 (CH<sub>2</sub>), 33.7 (CH<sub>2</sub>), 34.0 (C), 123.1 (q,  $^3J = 3.8$  Hz, CH), 124.3 (q,  $^1J = 271.7$  Hz, CF<sub>3</sub>), 125.1 (q,  $^3J = 3.3$  Hz, CH), 125.6 (CH), 127.3 (CH), 127.7 (CH), 128.1 (q,  $^2J = 32.4$  Hz, C), 128.3 (CH), 130.8 (CH), 138.3 (C), 138.8 (C), 141.1 (C), 142.3 (C), 142.7 (CH), 143.2 (C); HRMS-EI  $m/z$  [M]<sup>+</sup> calcd for C<sub>21</sub>H<sub>21</sub>F<sub>3</sub>: 330.1595, found: 330.1598.

**1.5.21. (E)-5-Butylidene-10,11-dihydro-3-methyl-5H-dibenzo[a,d]cycloheptene (E-1i) (Table 3, entry 14).**

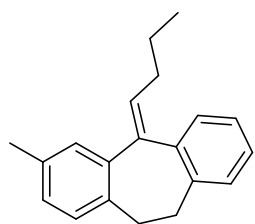

The title compound was synthesized using the same procedure described above. Colorless liquid: <sup>1</sup>H NMR (600 MHz, CDCl<sub>3</sub>, 324 K)  $\delta$  0.92 (t,  $J = 7.5$  Hz, 3H, CH<sub>3</sub> (*n*-Pr)), 1.44–1.51 (m, 2H, CH<sub>2</sub> (*n*-Pr)), 2.12 (app. br s, 2H, CH<sub>2</sub> (*n*-Pr)), 2.33 (s, 3H, CH<sub>3</sub>), 2.60–3.61 (m, 4H, CH<sub>2</sub>), 5.87 (t,  $J = 7.7$  Hz, 1H, CH (vinyl)), 6.92–6.99 (m, 2H, Ar), 7.11–7.23 (m, 5H, Ar); <sup>13</sup>C NMR (150 MHz, CDCl<sub>3</sub>, 324 K)  $\delta$  13.6 (CH<sub>3</sub>), 20.6 (CH<sub>3</sub>), 22.8 (CH<sub>2</sub>), 31.3 (CH<sub>2</sub>), 32.1 (CH<sub>2</sub>), 33.2 (CH<sub>2</sub>), 125.4 (CH), 127.0 (CH), 127.5 (CH), 127.8 (CH), 128.2 (CH), 128.9 (CH), 129.7 (CH), 131.6 (CH), 133.9 (C), 135.2 (C), 139.2 (C), 140.3 (C), 141.4 (C), 142.5 (C); HRMS-EI  $m/z$  [M]<sup>+</sup> calcd for C<sub>20</sub>H<sub>22</sub>: 262.1722, found: 262.1725.

**1.5.22. (Z)-12-(2,2-Dimethylpropylidene)-2-methoxy-3-((Z)-1-(5-methoxy-2-(3-phenylpropyl)-phenyl)-3,3-dimethylbut-1-en-1-yl)-5,6,7,12-tetrahydrodibenzo[a,d]cyclooctane (10) (Table 3, entry 1).**

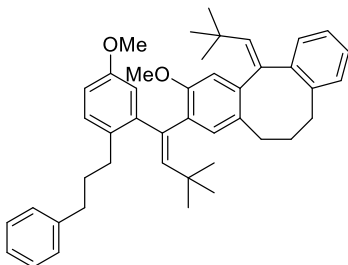

Colorless liquid: <sup>1</sup>H NMR (600 MHz, CDCl<sub>3</sub>)  $\delta$  0.91 (s, 9H, CH<sub>3</sub> (*t*-Bu)), 0.94 (s, 9H, CH<sub>3</sub> (*t*-Bu)), 1.36–1.49 (m, 1H, CH<sub>2</sub>), 1.60–1.73 (m, 2H, CH<sub>2</sub>), 1.99–2.34 (m, 1H, CH<sub>2</sub>), 2.36–2.42 (m, 2H, CH<sub>2</sub>), 2.42–2.50 (m, 2H, CH<sub>2</sub>), 2.52–3.38 (m, 4H, CH<sub>2</sub>), 3.68 (s, 3H, OMe), 3.83 (s, 3H, OMe), 5.59 (s, 1H, CH (vinyl)), 5.82 (s, 1H, CH (vinyl)), 6.61 (s, 1H, Ar), 6.70–6.75 (m, 1H, Ar), 6.75 (dd,  $J = 2.9, 8.5$  Hz, 1H, Ar), 6.93 (s, 1H, Ar), 6.96–7.01 (m, 2H, Ar), 7.04–7.09 (m, 3H, Ar), 7.11 (t,  $J = 7.3$  Hz, 1H, Ar), 7.15 (t,  $J = 7.3$  Hz, 1H, Ar), 7.18–7.26 (m, 3H, Ar); <sup>13</sup>C NMR (150 MHz, CDCl<sub>3</sub>, 322 K)  $\delta$  29.1 (2C), 30.6 (3CH<sub>3</sub>), 30.9 (3CH<sub>3</sub>), 31.9 (CH<sub>2</sub>), 32.0 (CH<sub>2</sub>), 34.1 (CH<sub>2</sub>), 34.2 (CH<sub>2</sub>), 36.1 (CH<sub>2</sub>), 36.4 (CH<sub>2</sub>), 55.4 (CH<sub>3</sub>), 55.9 (CH<sub>3</sub>), 112.5 (CH), 113.1 (CH), 117.9 (CH), 125.5 (CH), 126.1 (CH), 126.6 (CH), 128.2 (C), 128.2 (2CH), 128.4 (C), 128.4 (2CH), 128.5 (CH), 129.0 (CH), 130.0 (CH), 132.0 (C), 132.0 (CH), 133.1 (C), 139.7 (C), 139.8 (C), 139.8 (C), 140.4 (C), 141.4 (C), 142.6 (C), 143.3 (2CH), 155.0 (C), 156.5 (C); HRMS-EI  $m/z$  [M]<sup>+</sup> calcd for C<sub>44</sub>H<sub>52</sub>O<sub>2</sub>: 612.3967, found: 612.3970.

**1.5.23. 13-(2,2-Dimethylpropylidene)-6,7,8,13-tetrahydro-5H-dibenzo[a,d]cyclononene (3a) (Table 4, entry 1).**

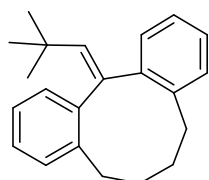

To a mixture of 1-(3,3-dimethylbut-1-yn-1-yl)-2-(4-phenylbutyl)benzene (**9a**) (29.2 mg, 101  $\mu$ mol) in CH<sub>2</sub>Cl<sub>2</sub> (1 mL) at 0 °C was added TfOH (8.8  $\mu$ L, 100  $\mu$ mol). The mixture was stirred at 0 °C for 10 min, quenched with saturated aqueous NaHCO<sub>3</sub>, and then



extracted with ethyl acetate (3 × 1 mL). The combined organic layers were washed with brine, dried over Na<sub>2</sub>SO<sub>4</sub>, and evaporated. The residue was purified by silica gel column chromatography using hexane as an eluent to give **3a** as a colorless liquid (12.4 mg, 42.7 μmol, 43%): <sup>1</sup>H NMR (600 MHz, CDCl<sub>3</sub>) δ 0.94 (s, 10H, CH<sub>3</sub> (*t*-Bu), CH<sub>2</sub>), 1.34–1.45 (m, 1H, CH<sub>2</sub>), 1.71–1.81 (m, 2H, CH<sub>2</sub>), 2.46–2.56 (m, 2H, CH<sub>2</sub>), 3.11 (dt, *J* = 5.3, 13.3 Hz, 1H, CH<sub>2</sub>), 3.37–3.54 (m, 1H, CH<sub>2</sub>), 5.51 (s, 1H, CH (vinyl)), 7.01–7.15 (m, 6H, Ar), 7.24–7.30 (m, 2H, Ar); <sup>13</sup>C NMR (150 MHz, CDCl<sub>3</sub>) δ 27.5 (CH<sub>2</sub>), 29.3 (CH<sub>2</sub>), 30.4 (CH<sub>2</sub>), 30.6 (3CH<sub>3</sub>), 30.9 (CH<sub>2</sub>), 34.5 (C), 125.5 (CH), 125.5 (CH), 126.9 (CH), 127.1 (CH), 128.9 (CH), 129.2 (CH), 129.7 (CH), 129.8 (CH), 137.0 (C), 139.7 (C), 141.4 (C), 141.8 (C), 142.2 (CH), 145.8 (C); HRMS-EI *m/z* [M]<sup>+</sup> calcd for C<sub>22</sub>H<sub>26</sub>: 290.2035, found: 290.2031.

**1.5.24. 13-Butylidene-6,7,8,13-tetrahydro-5H-dibenzo[*a,d*]cyclononene (3b) (Table 4, entry 3).**

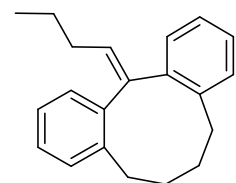

The title compound was synthesized using the same procedure described above. Colorless liquid: <sup>1</sup>H NMR (600 MHz, CDCl<sub>3</sub>) δ 0.88 (t, *J* = 7.4 Hz, 3H, CH<sub>3</sub> (*n*-Pr)), 1.43 (sext, *J* = 7.4 Hz, 2H, CH<sub>2</sub> (*n*-Pr)), 1.44–1.86 (m, 4H, CH<sub>2</sub>), 1.93 (q, *J* = 6.6 Hz, 2H, CH<sub>2</sub> (*n*-Pr)), 2.10–3.46 (m, 4H, CH<sub>2</sub>), 5.70 (t, *J* = 7.3 Hz, 1H, CH (vinyl)), 7.03 (dd, *J* = 1.8, 6.9 Hz, 1H, Ar), 7.08 (dd, *J* = 1.9, 7.6 Hz, 1H, Ar), 7.10–7.18 (m, 5H, Ar), 7.33 (dd, *J* = 1.9, 6.8 Hz, 1H, Ar); <sup>13</sup>C NMR (150 MHz, CDCl<sub>3</sub>) δ 13.9 (CH<sub>3</sub>), 22.4 (CH<sub>2</sub>), 28.7 (CH<sub>2</sub>), 29.2 (CH<sub>2</sub>), 30.8 (CH<sub>2</sub>), 31.1 (CH<sub>2</sub>), 31.7 (CH<sub>2</sub>), 125.6 (CH), 125.8 (CH), 126.9 (CH), 127.0 (CH), 128.7 (CH), 129.0 (CH), 129.2 (CH), 129.4 (CH), 132.3 (CH), 140.5 (C), 141.0 (C), 141.1 (2C), 144.0 (C); HRMS-EI *m/z* [M]<sup>+</sup> calcd for C<sub>21</sub>H<sub>24</sub>: 276.1878, found: 276.1877.

**1.5.25. 13-Hexylidene-6,7,8,13-tetrahydro-5H-dibenzo[*a,d*]cyclononene (3c) (Table 4, entry 4).**

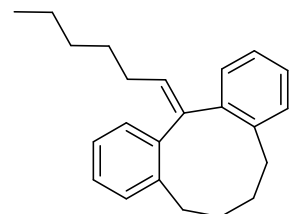

The title compound was synthesized using the same procedure described above. Colorless liquid: <sup>1</sup>H NMR (500 MHz, CDCl<sub>3</sub>) δ 0.85 (t, *J* = 7.6 Hz, 3H, CH<sub>3</sub>), 1.22–1.26 (m, 6H, CH<sub>2</sub>), 1.37–1.44 (m, 2H, CH<sub>2</sub>), 1.44–1.70 (m, 2H, CH<sub>2</sub>), 1.95 (ap q, *J* = 7.7 Hz, 2H, CH<sub>2</sub>), 2.20–3.20 (m, 4H, CH<sub>2</sub>), 5.78 (t, *J* = 7.2 Hz, 1H, CH (vinyl)), 7.03 (dd, *J* = 1.7, 7.6 Hz, 1H, Ar), 7.07–7.09 (m, 1H, Ar), 7.11–7.18 (m, 5H, Ar), 7.33 (dd, *J* = 1.7, 7.6 Hz, 1H, Ar); <sup>13</sup>C NMR (126 MHz, CDCl<sub>3</sub>) δ 14.0 (CH<sub>3</sub>), 22.5 (CH<sub>2</sub>), 28.7 (CH<sub>2</sub>), 28.9 (CH<sub>2</sub>), 29.0 (CH<sub>2</sub>), 29.2 (CH<sub>2</sub>), 30.8 (CH<sub>2</sub>), 31.5 (CH<sub>2</sub>), 31.7 (CH<sub>2</sub>), 125.6 (CH), 125.8 (CH), 126.9 (CH), 127.0 (CH), 128.7 (CH), 129.0 (CH), 129.2 (CH), 129.4 (CH), 132.5 (CH), 140.5 (C), 140.8 (C), 141.1 (C), 141.2 (C), 144.0 (C); HRMS-ESI *m/z* [M+H]<sup>+</sup> calcd for C<sub>23</sub>H<sub>29</sub>: 305.2264, found: 305.2271.

**1.5.26. (*E*)- and (*Z*)-13-(2,2-Dimethylpropylidene)-2-methyl-6,7,8,13-tetrahydro-5H-dibenzo[*a,d*]-cyclononene (3d) (Table 4, entry 5).**

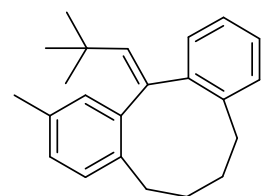

The title compound was obtained as a mixture of (*E*)- and (*Z*)-isomers (major:minor = 52:48) by the same procedure described above. Yellow liquid: <sup>1</sup>H NMR (500 MHz, CDCl<sub>3</sub>) (mixture) δ 0.92–0.95 (m, 20H, CH<sub>3</sub> (*t*-Bu), CH<sub>2</sub>), 1.33–1.43 (m, 2H, CH<sub>2</sub>), 1.69–1.81 (m, 4H, CH<sub>2</sub>), 2.26 (s, 3H, CH<sub>3</sub> (*p*-tol)), 2.30 (s, 3H, CH<sub>3</sub> (*p*-tol)), 2.45–2.53 (m, 4H, CH<sub>2</sub>), 3.02–3.13 (m, 2H, CH<sub>2</sub>), 3.32–3.49 (m, 2H, CH<sub>2</sub>), 5.48 (s, 1H, CH (vinyl)), 5.48 (s, 1H, CH (vinyl)), 6.89–6.93 (m, 3H, Ar), 6.96 (d, *J* = 7.6 Hz, 1H, Ar), 7.02–7.14 (m, 8H,

Ar), 7.25–7.31 (m, 2H, Ar);  $^{13}\text{C}$  NMR (150 MHz,  $\text{CDCl}_3$ ) (mixture)  $\delta$  21.0 ( $\text{CH}_3$ ), 21.1 ( $\text{CH}_3$ ), 27.2 ( $\text{CH}_2$ ), 27.5 ( $\text{CH}_2$ ), 28.6 ( $\text{CH}_2$ ), 29.1 ( $\text{CH}_2$ ), 30.0 ( $\text{CH}_2$ ), 30.2 ( $\text{CH}_2$ ), 30.3 ( $\text{CH}_2$ ), 30.4 (6 $\text{CH}_3$ ), 30.7 ( $\text{CH}_2$ ), 34.3 (C), 34.3 (C), 125.2 (CH), 125.3 (CH), 126.6 (CH), 126.8 (CH), 127.5 (CH), 127.5 (CH), 128.5 (CH), 128.7 (CH), 129.0 (CH), 129.4 (2CH), 129.5 (CH), 129.7 (CH), 130.2 (CH), 134.5 (C), 134.6 (C), 136.3 (C), 136.8 (C), 136.9 (C), 138.5 (C), 139.7 (C), 140.9 (C), 141.2 (C), 141.7 (C), 141.8 (CH), 141.8 (CH), 145.3 (C), 145.7 (C); HRMS-EI  $m/z$   $[\text{M}]^+$  calcd for  $\text{C}_{23}\text{H}_{28}$ : 304.2191, found: 304.2182.

**1.5.27. (*E*)- and (*Z*)-13-Butylidene-2-methyl-6,7,8,13-tetrahydro-5*H*-dibenzo[*a,d*]cyclononene (3e) (Table 4, entry 6).**

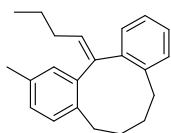

The title compound was obtained as a mixture of (*E*)- and (*Z*)-isomers (major:minor = 74:26) by the same procedure described above. Colorless liquid:  $^1\text{H}$  NMR (500 MHz,  $\text{CDCl}_3$ ) (major)  $\delta$  0.89 (t, 3H,  $J$  = 1.7, 7.6 Hz,  $\text{CH}_3$ ), 1.40–1.46 (m, 2H,  $\text{CH}_2$ ), 1.52–1.57 (m, 4H,  $\text{CH}_2$ ), 1.89–1.97 (m, 2H,  $\text{CH}_2$ ), 2.26 (s, 3H,  $\text{CH}_3$ ), 2.30–3.20 (m, 4H,  $\text{CH}_2$ ), 5.69 (t,  $J$  = 6.5 Hz, 1H, vinyl), 6.87 (br s, 1H, Ar), 6.96 (dd,  $J$  = 1.4, 7.5 Hz, 1H, Ar), 7.01–7.03 (m, 2H, Ar), 7.12–7.17 (m, 2H, Ar), 7.34–7.31 (dd,  $J$  = 1.6, 7.4 Hz, 1H, Ar);  $^{13}\text{C}$  NMR (150 MHz,  $\text{CDCl}_3$ ) (major)  $\delta$  13.9 ( $\text{CH}_3$ ), 21.0 ( $\text{CH}_3$ ), 22.4 ( $\text{CH}_2$ ), 28.9 ( $\text{CH}_2$ ), 29.1 ( $\text{CH}_2$ ), 30.9 ( $\text{CH}_2$ ), 31.09 ( $\text{CH}_2$ ), 31.13 ( $\text{CH}_2$ ), 125.6 (CH), 126.8 (CH), 127.7 (CH), 128.9 (CH), 129.2 (CH), 129.3 (CH), 129.4 (CH), 132.1 (CH), 135.1 (C), 137.9 (C), 140.2 (C), 141.1 (C), 141.3 (C), 144.1 (C); HRMS-ESI  $m/z$   $[\text{M}+\text{Na}]^+$  calcd for  $\text{C}_{22}\text{H}_{26}\text{Na}$ : 313.1927, found: 313.1932.

**1.5.28. (*E*)- and (*Z*)-13-(2,2-Dimethylpropylidene)-3-methyl-6,7,8,13-tetrahydro-5*H*-dibenzo[*a,d*]cyclononene (3f) (Table 4, entry 7).**

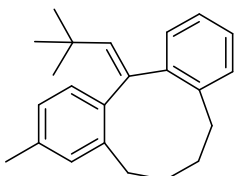

The title compound was obtained as a mixture of (*E*)- and (*Z*)-isomers (major:minor = 51:49) by the same procedure described above. Colorless liquid:  $^1\text{H}$  NMR (500 MHz,  $\text{CDCl}_3$ ) (mixture)  $\delta$  0.89–1.01 (m, 20H,  $\text{CH}_3$  (*t*-Bu),  $\text{CH}_2$ ), 1.32–1.46 (m, 2H,  $\text{CH}_2$ ), 1.69–1.82 (m, 4H,  $\text{CH}_2$ ), 2.26 (s, 3H,  $\text{CH}_3$ ), 2.28 (s, 3H,  $\text{CH}_3$ ), 2.42–2.56 (m, 4H,  $\text{CH}_2$ ), 3.02–3.16 (m, 2H,  $\text{CH}_2$ ), 3.33–3.52 (m, 2H,  $\text{CH}_2$ ), 5.50 (s, 2H, CH (vinyl)), 6.85–6.96 (m, 4H, Ar), 7.01–7.19 (m, 8H, Ar), 7.21–7.26 (m, 2H, Ar);  $^{13}\text{C}$  NMR (125 MHz,  $\text{CDCl}_3$ ) (mixture)  $\delta$  21.2 (3 $\text{CH}_3$ ), 21.3 (3 $\text{CH}_3$ ), 27.5 ( $\text{CH}_2$ ), 27.6 ( $\text{CH}_2$ ), 29.3 ( $\text{CH}_2$ ), 29.3 ( $\text{CH}_2$ ), 30.3 ( $\text{CH}_2$ ), 30.4 ( $\text{CH}_2$ ), 30.7 ( $\text{CH}_3$ ), 30.7 ( $\text{CH}_3$ ), 31.0 ( $\text{CH}_2$ ), 31.0 ( $\text{CH}_2$ ), 34.5 (2C), 125.5 (CH), 125.6 (CH), 126.2 (CH), 126.3 (CH), 126.8 (CH), 127.0 (CH), 128.9 (CH), 129.1 (2CH), 129.6 (CH), 129.7 (CH), 129.8 (CH), 129.8 (CH), 130.4 (CH), 136.4 (C), 136.6 (C), 137.0 (C), 137.2 (C), 138.4 (C), 139.6 (C), 139.7 (C), 141.6 (2C), 141.7 (C), 142.1 (CH), 142.2 (CH), 143.1 (C), 146.1 (C); HRMS-ESI  $m/z$   $[\text{M}+\text{H}]^+$  calcd for  $\text{C}_{23}\text{H}_{29}$ : 305.2264, found: 305.2261.

**1.5.29. (*E*)- and (*Z*)-13-Butylidene-3-methyl-6,7,8,13-tetrahydro-5*H*-dibenzo[*a,d*]cyclononene (3g) (Table 4, entry 8).**

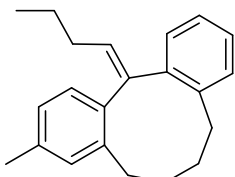

The title compound was obtained as a mixture of (*E*)- and (*Z*)-isomers (major:minor = 51:49) by the same procedure described above. Colorless liquid:  $^1\text{H}$  NMR (500 MHz,  $\text{CDCl}_3$ ) (mixture)  $\delta$  0.87 (t,  $J$  = 7.3 Hz, 3H,  $\text{CH}_3$ ), 0.88 (t,  $J$  = 7.3 Hz, 3H,  $\text{CH}_3$ ), 1.38–1.46 (m, 4H,  $\text{CH}_2$ ), 1.52–1.57 (m, 8H,  $\text{CH}_2$ ), 1.89–1.97 (m, 4H,  $\text{CH}_2$ ), 2.28 (s, 3H,  $\text{CH}_3$ ), 2.29 (s, 3H,  $\text{CH}_3$ ), 2.30–3.20 (m, 8H,  $\text{CH}_2$ ), 5.68 (t,  $J$  = 7.0 Hz, 1H, vinyl), 5.69 (t,  $J$  = 7.0 Hz, 1H, vinyl),

6.85 (br s, 1H, Ar), 6.93–6.97 (m, 4H, Ar), 7.01–7.03 (m, 1H, Ar), 7.06 (app d,  $J = 7.6$  Hz, 1H, Ar), 7.10–7.18 (m, 5H, Ar), 7.23 (d,  $J = 7.6$  Hz, 1H, Ar), 7.29–7.31 (m, 1H, Ar);  $^{13}\text{C}$  NMR (150 MHz,  $\text{CDCl}_3$ ) (mixture)  $\delta$  13.90 ( $\text{CH}_3$ ), 13.92 ( $\text{CH}_3$ ), 21.0 ( $\text{CH}_3$ ), 21.1 ( $\text{CH}_3$ ), 22.4 ( $2\text{CH}_2$ ), 28.8 ( $2\text{CH}_2$ ), 29.2 ( $2\text{CH}_2$ ), 30.9 ( $\text{CH}_2$ ), 31.1 ( $\text{CH}_2$ ), 31.3 ( $2\text{CH}_2$ ), 31.7 ( $\text{CH}_2$ ), 31.8 ( $\text{CH}_2$ ), 125.6 ( $\text{CH}$ ), 125.8 ( $\text{CH}$ ), 126.3 ( $\text{CH}$ ), 126.5 ( $\text{CH}$ ), 126.8 ( $\text{CH}$ ), 126.9 ( $\text{CH}$ ), 128.6 ( $\text{CH}$ ), 128.7 ( $\text{CH}$ ), 129.0 ( $\text{CH}$ ), 129.2 ( $2\text{CH}$ ), 129.4 ( $\text{CH}$ ), 129.8 ( $\text{CH}$ ), 130.3 ( $\text{CH}$ ), 132.0 ( $\text{CH}$ ), 132.2 ( $\text{CH}$ ), 136.4 ( $2\text{C}$ ), 137.5 ( $\text{C}$ ), 140.7 ( $\text{C}$ ), 140.93 ( $\text{C}$ ), 140.94 ( $\text{C}$ ), 140.97 ( $\text{C}$ ), 140.99 ( $\text{C}$ ), 141.06 ( $\text{C}$ ), 141.08 ( $\text{C}$ ), 141.2 ( $\text{C}$ ), 144.2 ( $\text{C}$ ); HRMS-ESI  $m/z$   $[\text{M}+\text{H}]^+$  calcd for  $\text{C}_{22}\text{H}_{27}$ : 291.2107, found: 291.2115.

## 1.6. Preparation of 5,6,7,8-tetrahydro-13H-dibenzo[*a,d*][9]annulen-13-one (6)

### 1.6.1. 5,6,7,8-Tetrahydro-13H-dibenzo[*a,d*][9]annulen-13-one (6) (eqn (3)).

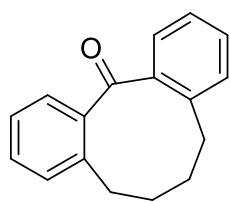

To a stirred mixture of 13-butyldiene-6,7,8,13-tetrahydro-5H-dibenzo[*a,d*]cyclononene (**3b**) (95.7 mg, 350  $\mu\text{mol}$ ),  $\text{RuCl}_3$  (24.2 mg, 92.6  $\mu\text{mol}$ , 26 mol%),  $\text{CH}_3\text{CN}$  (5.0 mL) and distilled water (3.0 mL) at room temperature was added a mixture of Oxone (903 mg, 1.47 mmol) and  $\text{NaHCO}_3$  (378 mg, 4.52 mmol) in portions over a period of 10 min. The mixture was stirred for 2 h, quenched with saturated aqueous  $\text{Na}_2\text{S}_2\text{O}_3$ , and then extracted with  $\text{CH}_2\text{Cl}_2$ . The combined organic layers were washed with water and brine, dried over  $\text{Na}_2\text{SO}_4$ . Then the solvent was removed under reduced pressure and the residue was purified by silica gel column chromatography using ethyl acetate/hexane = 1/8 as an eluent to give 5,6,7,8-tetrahydro-13H-dibenzo[*a,d*][9]annulen-13-one (**6**) as a colorless liquid (50.7 mg, 215  $\mu\text{mol}$ , 61%): IR (neat)  $1666\text{ cm}^{-1}$  (lit.<sup>6</sup>  $1655\text{ cm}^{-1}$ );  $^1\text{H}$  NMR (600 MHz,  $\text{CDCl}_3$ )  $\delta$  1.73 (app. br s, 4H,  $\text{CH}_2$ ), 2.68 (app. br s, 4H,  $\text{CH}_2$ ), 7.19 (d,  $J = 7.6$  Hz, 2H, Ar), 7.30 (d,  $J = 7.6$  Hz, 2H, Ar), 7.39 (td,  $J = 1.1, 7.6$  Hz, 2H, Ar), 7.48 (d,  $J = 7.6$  Hz, 2H, Ar);  $^{13}\text{C}$  NMR (150 MHz,  $\text{CDCl}_3$ )  $\delta$  27.0 ( $2\text{CH}_2$ ), 32.9 ( $2\text{CH}_2$ ), 126.1 ( $2\text{CH}$ ), 126.6 ( $2\text{CH}$ ), 130.6 ( $2\text{CH}$ ), 130.9 ( $2\text{CH}$ ), 141.1 ( $2\text{C}$ ), 141.4 ( $2\text{C}$ ), 203.4 ( $\text{C}=\text{O}$ ); HRMS-ESI  $m/z$   $[\text{M}+\text{Na}]^+$  calcd for  $\text{C}_{17}\text{H}_{16}\text{ONa}$ : 259.1093, found: 259.1089.

<sup>6</sup> P. Caubere, M. S. Mourad, G. Guillaumet, *Tetrahedron*, 1973, **29**, 1851.

## 2. NMR spectra

### 3-(10,11-Dihydro-5*H*-dibenzo[*a,d*][7]annulen-5-ylidene)-*N,N*-dimethylpropan-1-amine (1a).

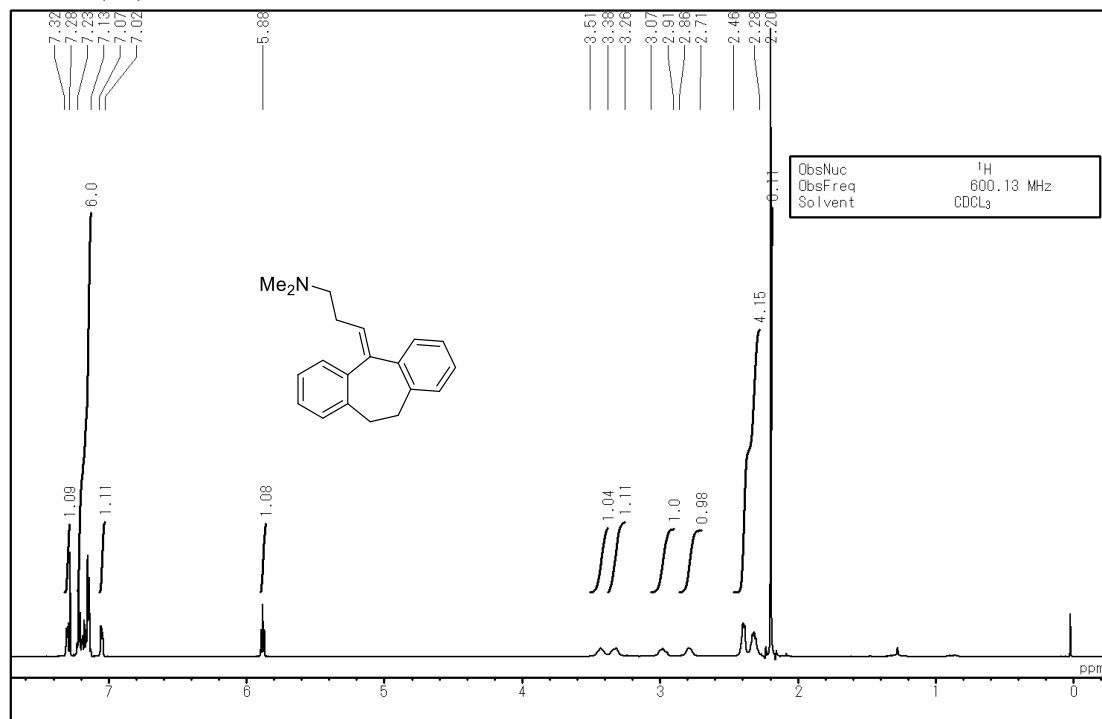

### 3-(10,11-Dihydro-5*H*-dibenzo[*a,d*][7]annulen-5-ylidene)-*N*-methylpropan-1-amine (1b).

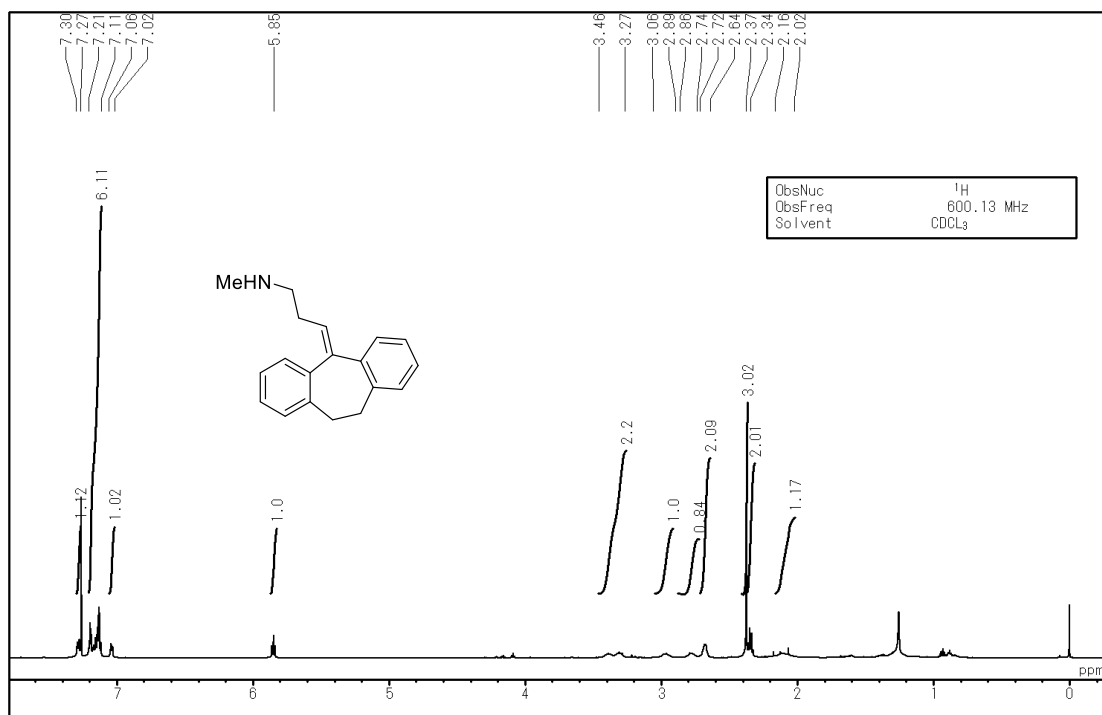

**5-(2,2-Dimethylpropylidene)-10,11-dihydro-5H-dibenzo[*a,d*]cycloheptene (1c).**

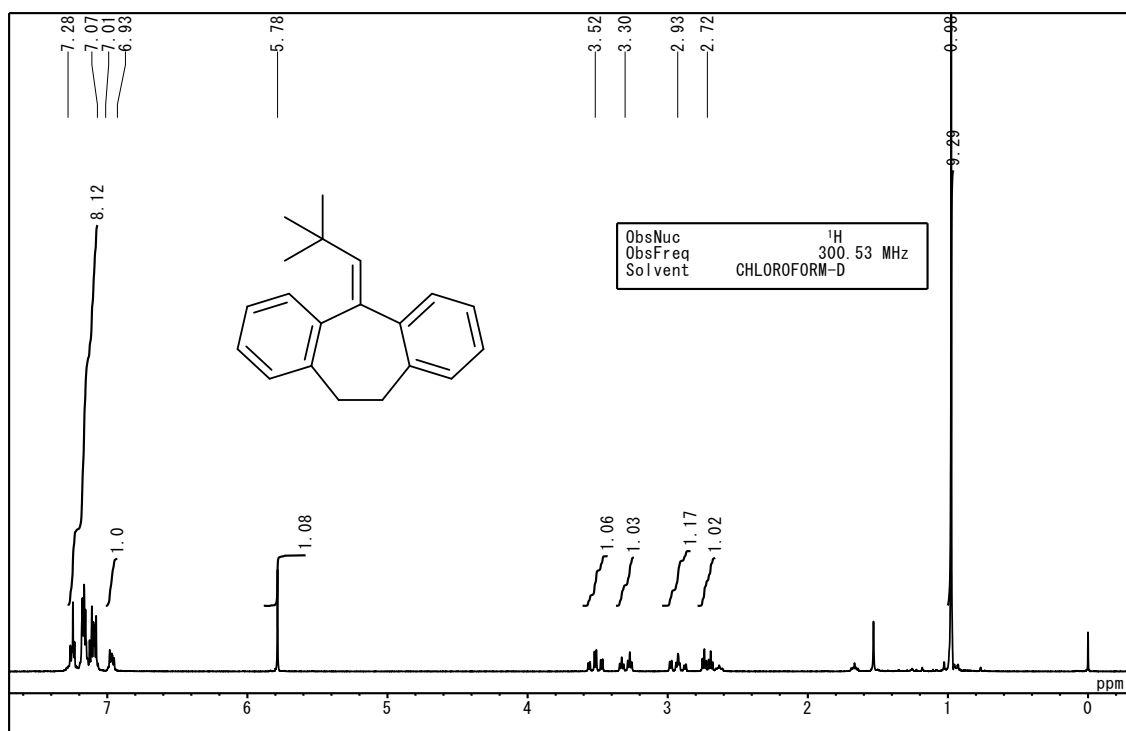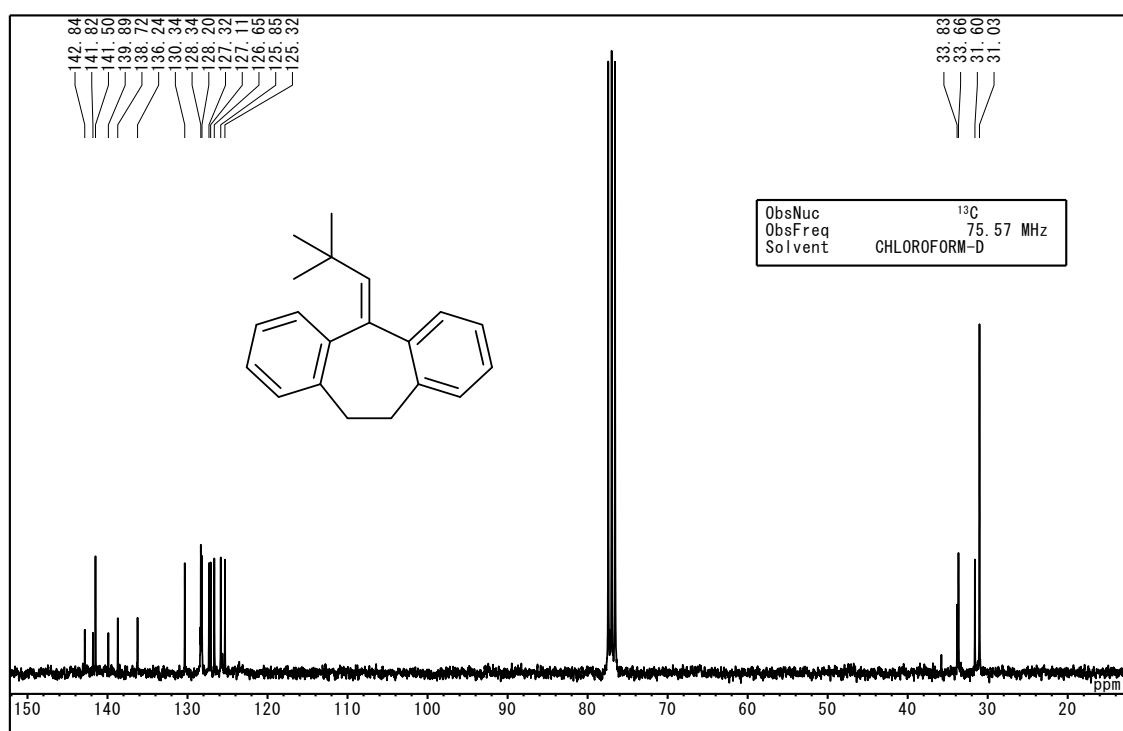

**5-(Butylidene)-10,11-dihydro-5*H*-dibenzo[*a,d*]cycloheptene (1d).**

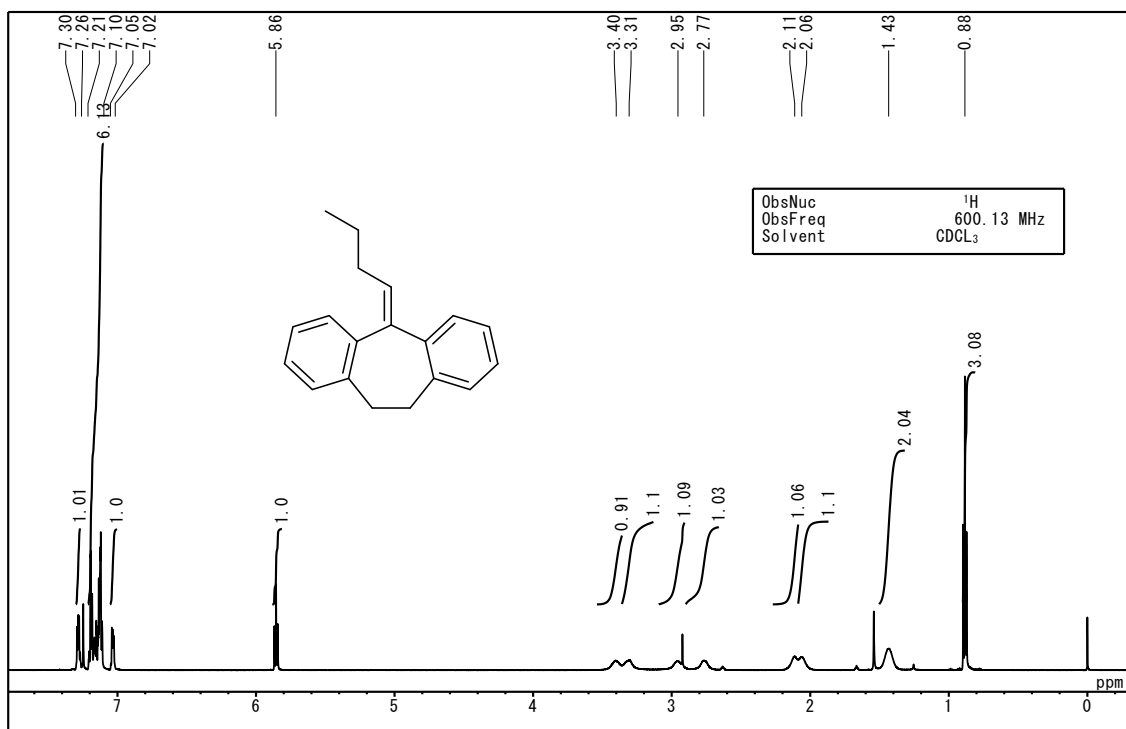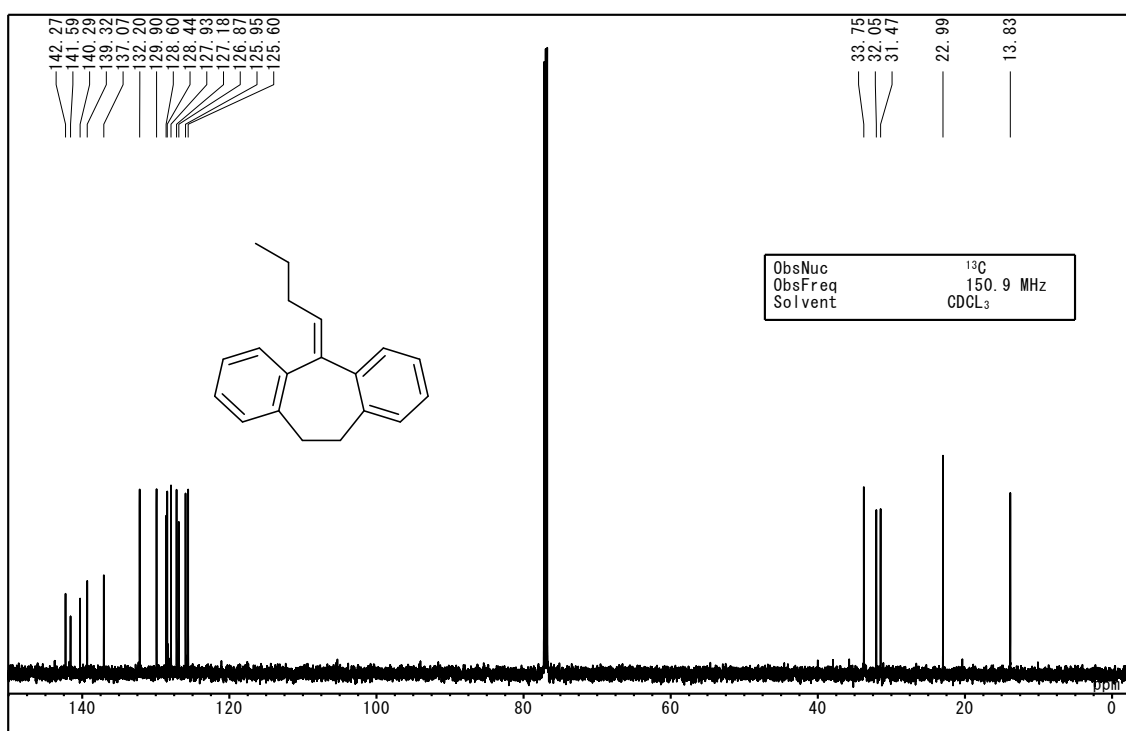

**3-(10,11-Dihydro-5*H*-dibenzo[*a,d*][7]annulen-5-ylidene)propan-1-ol (1f).**

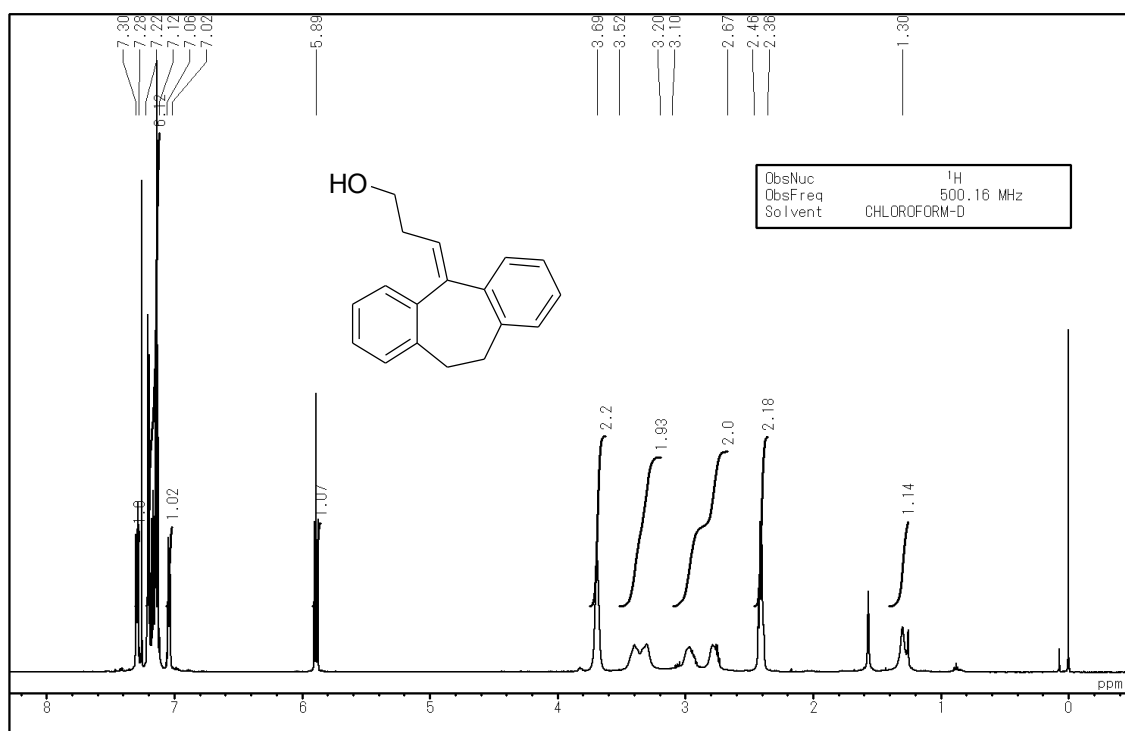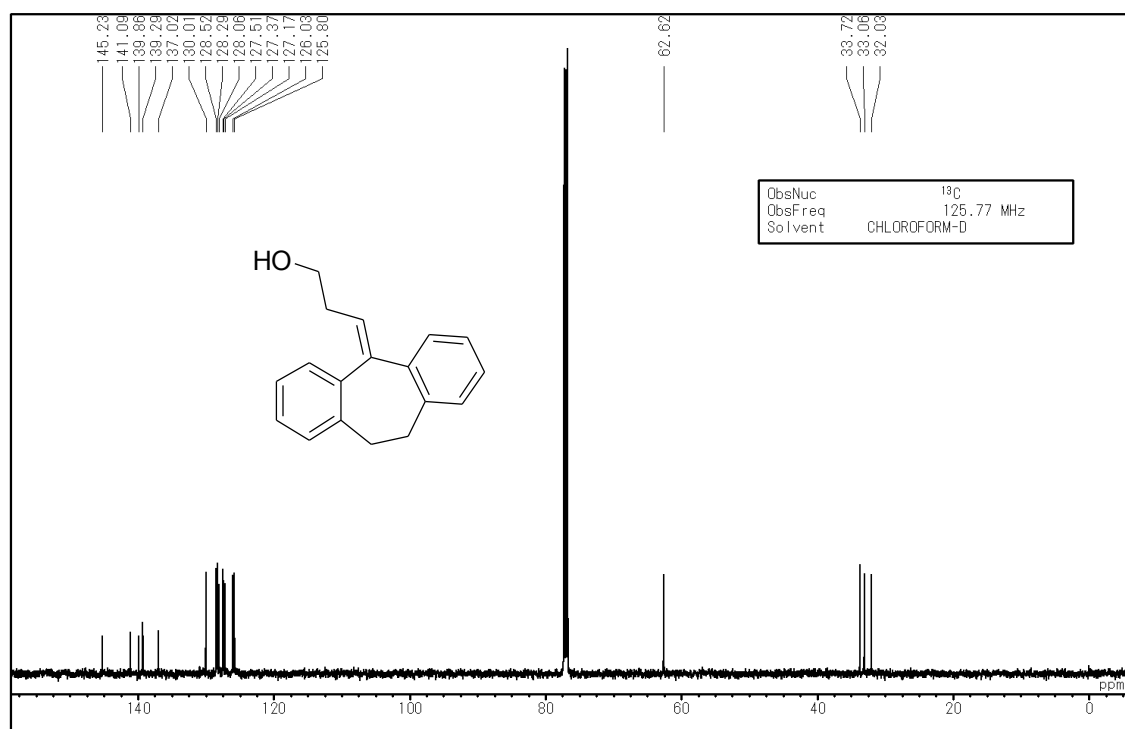

**(E)-5-(2,2-Dimethylpropylidene)-10,11-dihydro-3-methyl-5H-dibenzo[*a,d*]cycloheptene (E-1g).**

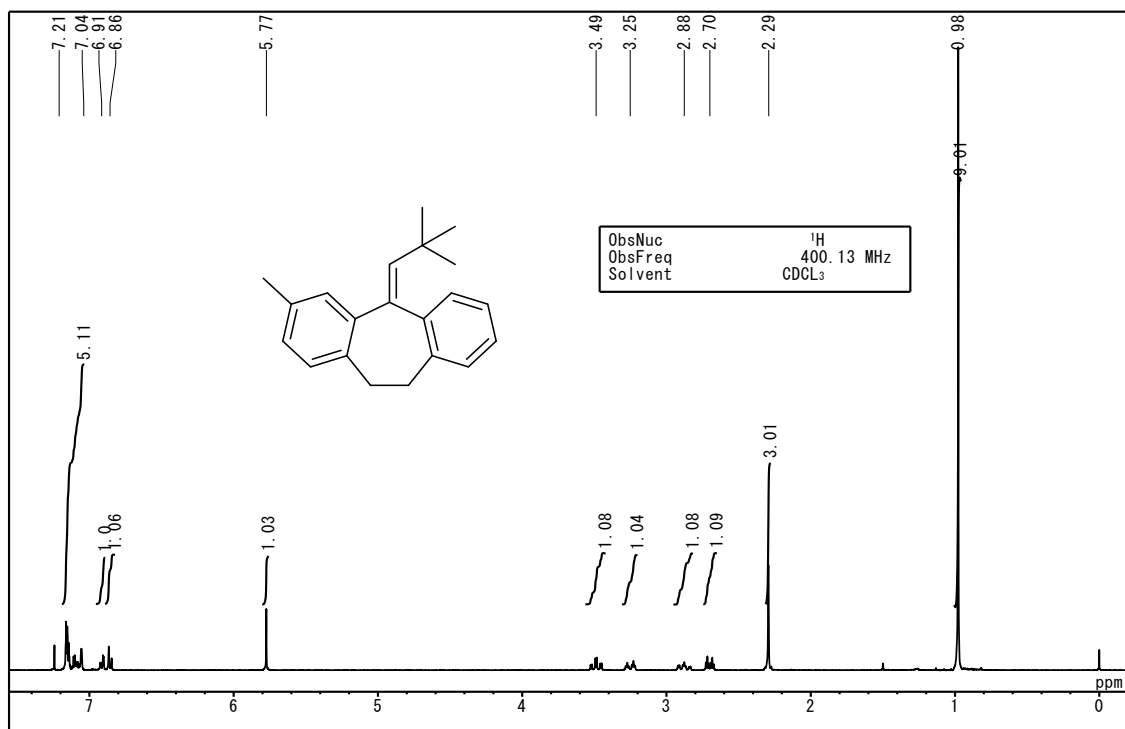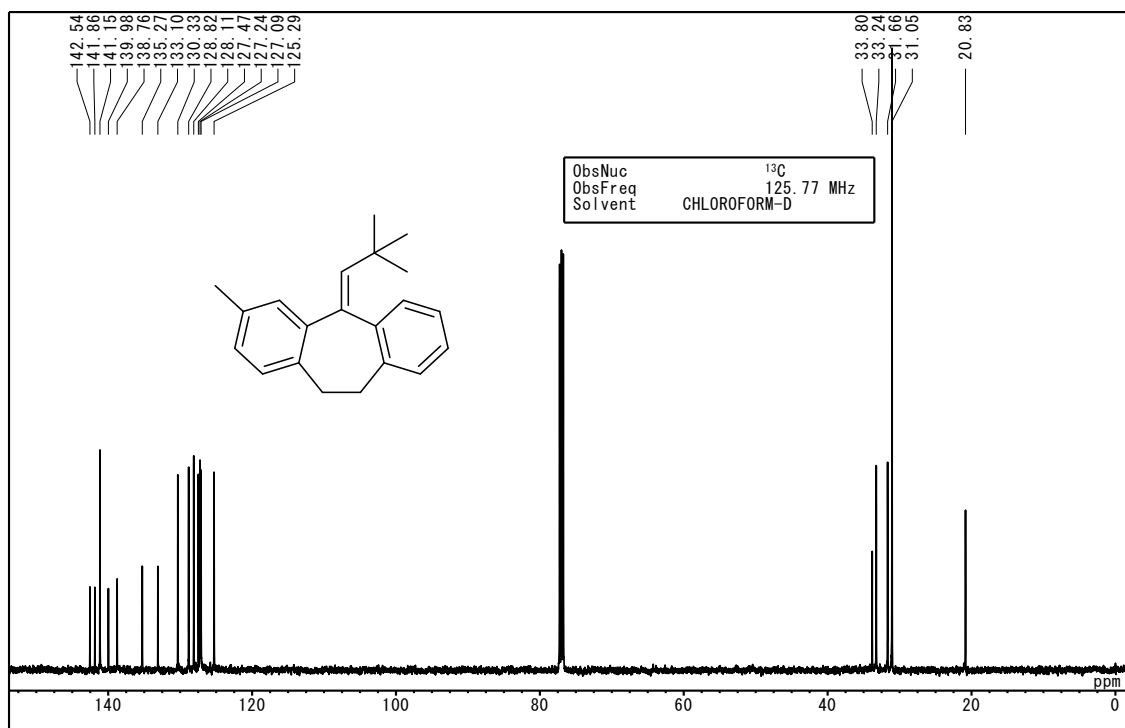



**(*E*)-5-(2,2-Dimethylpropylidene)-10,11-dihydro-3-(trifluoromethyl)-5*H*-dibenzo[*a*,*d*]cycloheptene (*E*-1h).**

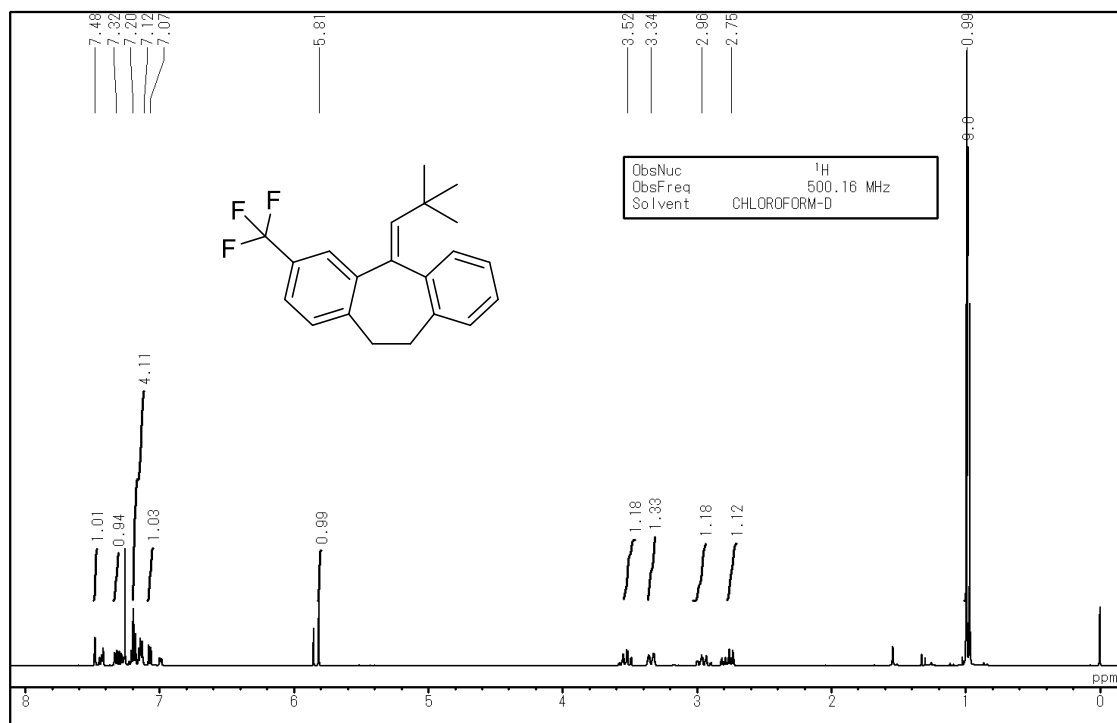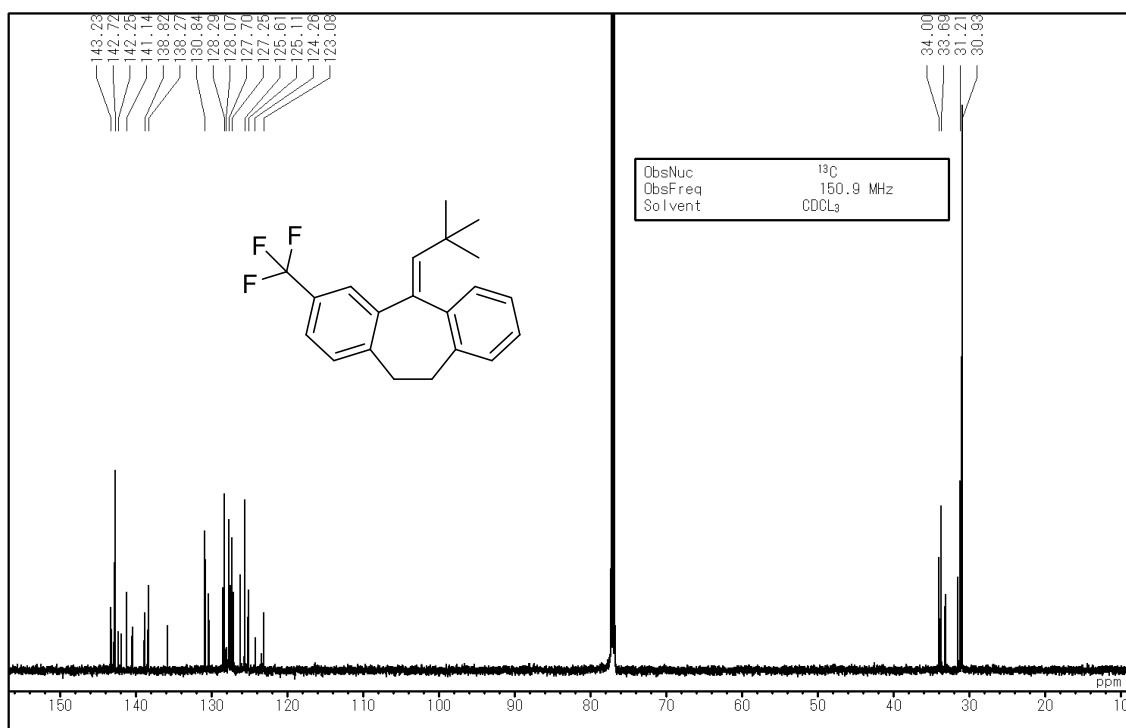

**10,11-Dihydro-5-methylene-3-(trifluoromethyl)-5*H*-dibenzo[*a,d*]cycloheptene (1h').**

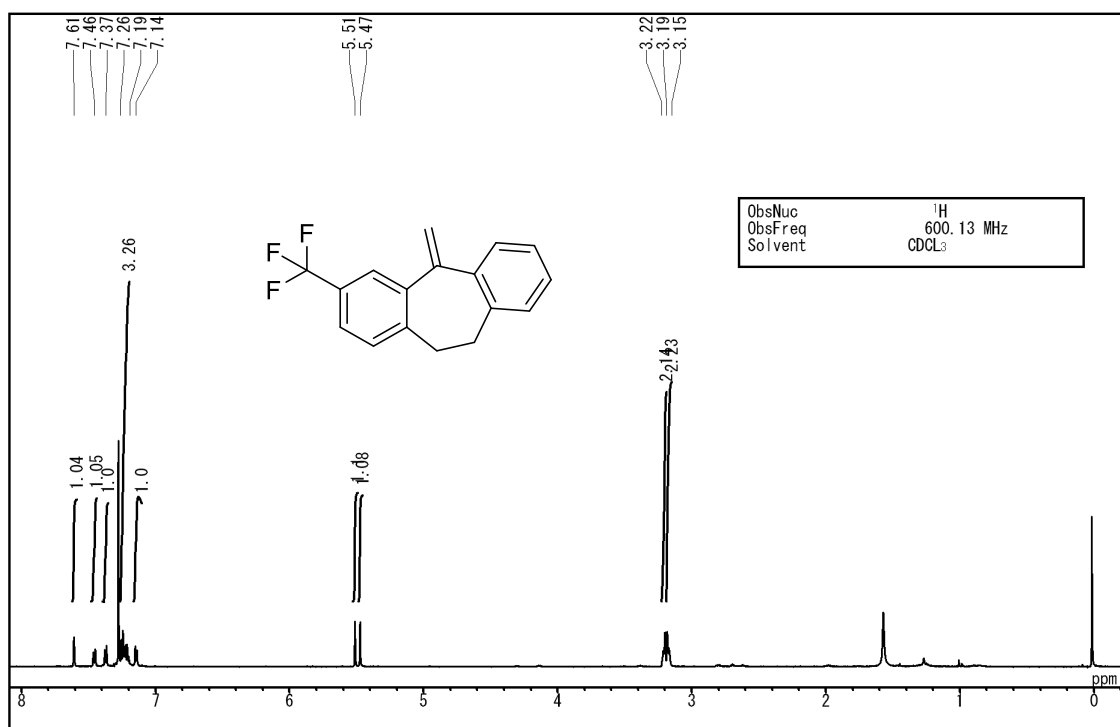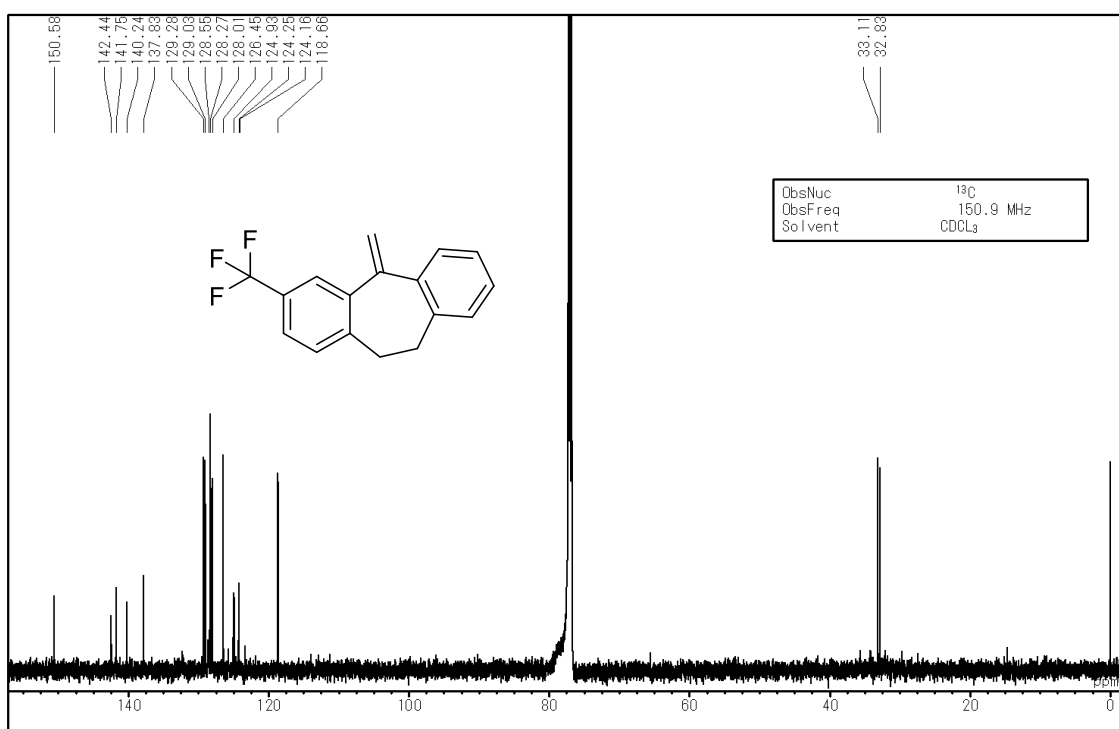

CC1=CC=C2C(=C1)C(=CC=C2)C(=C3C=CC=CC3)CC4CCCCC4

ObsNuc: <sup>1</sup>H  
ObsFreq: 600.13 MHz  
Solvent: CDCl<sub>3</sub>

| Chemical Shift (ppm)   | Integration |
|------------------------|-------------|
| 7.23, 7.11, 6.99, 6.92 | 2.0         |
| 5.03                   | 1.0         |
| 5.87                   | 4.27        |
| 3.61                   | 3.13        |
| 2.60                   | 2.01        |
| 2.33                   | 2.18        |
| 2.12                   | 3.08        |

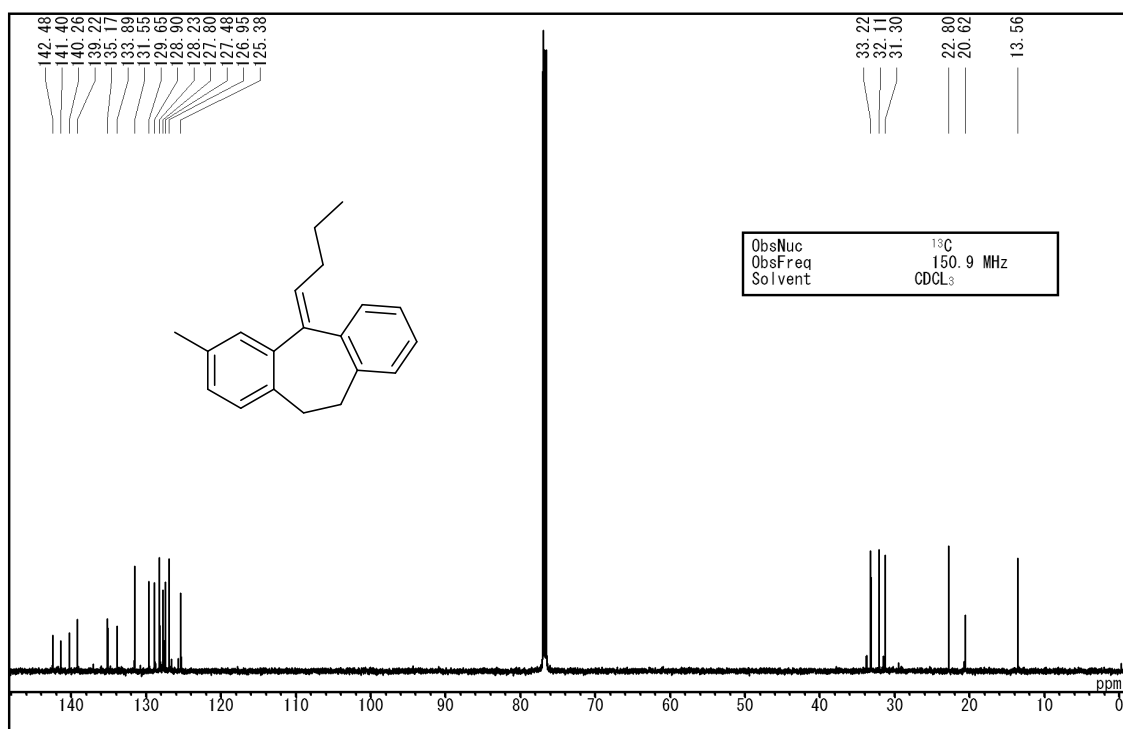

**12-(2,2-Dimethylpropylidene)-5,6,7,12-tetrahydro-dibenzo[*a,d*]cyclooctene (2a).**

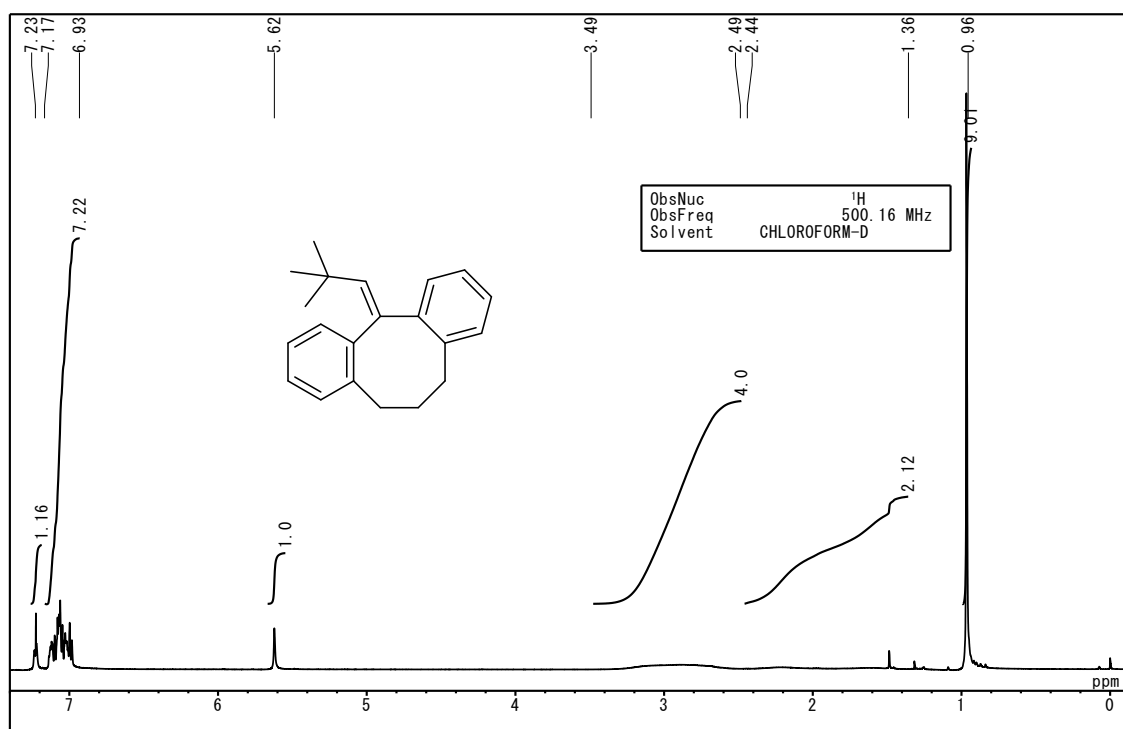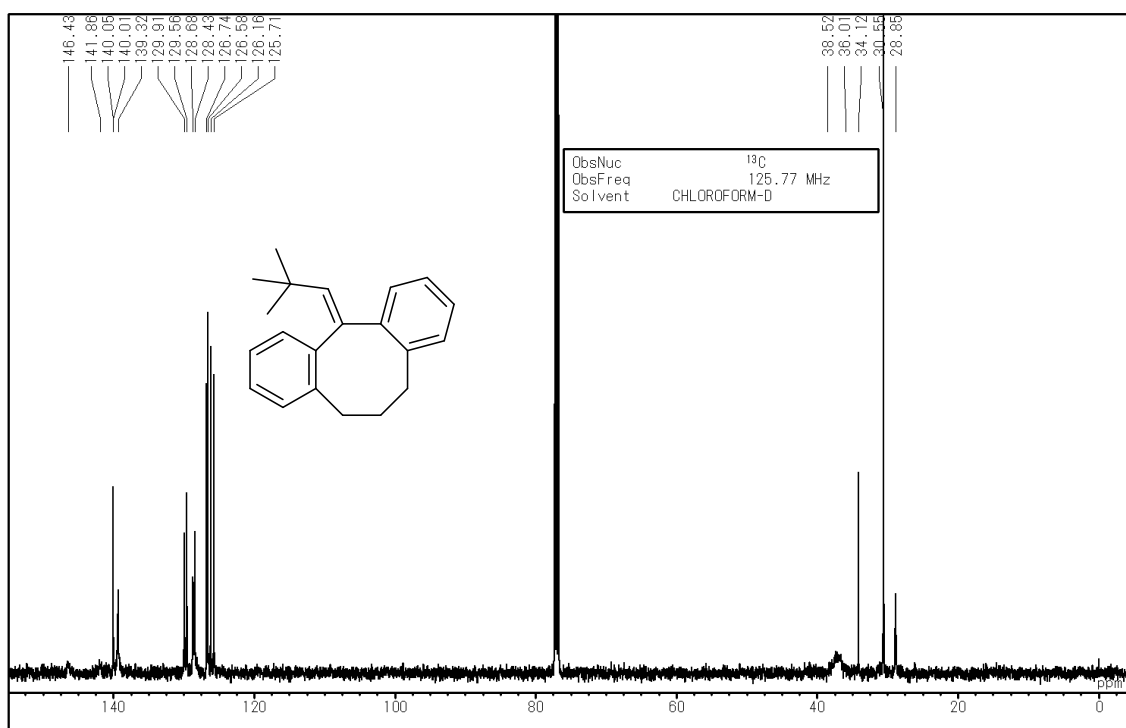

**5,6,7,12-Tetrahydro-12-(2-methylpropylidene)-dibenzo[*a,d*]cyclooctene (2b).**

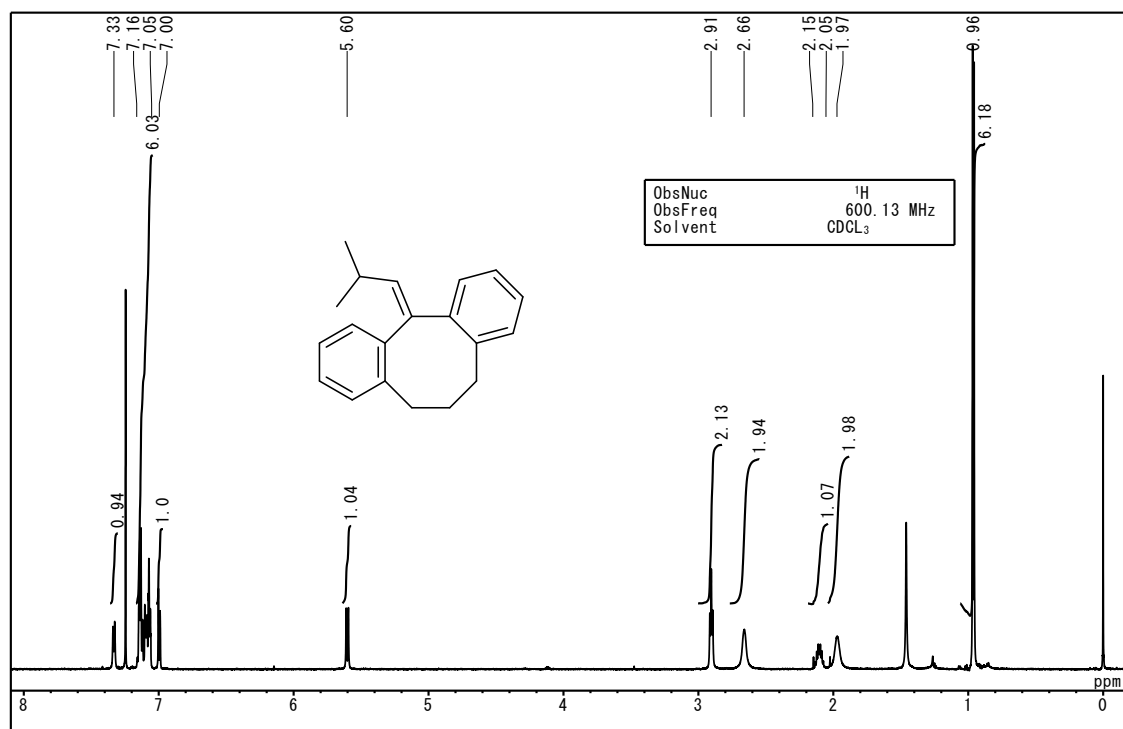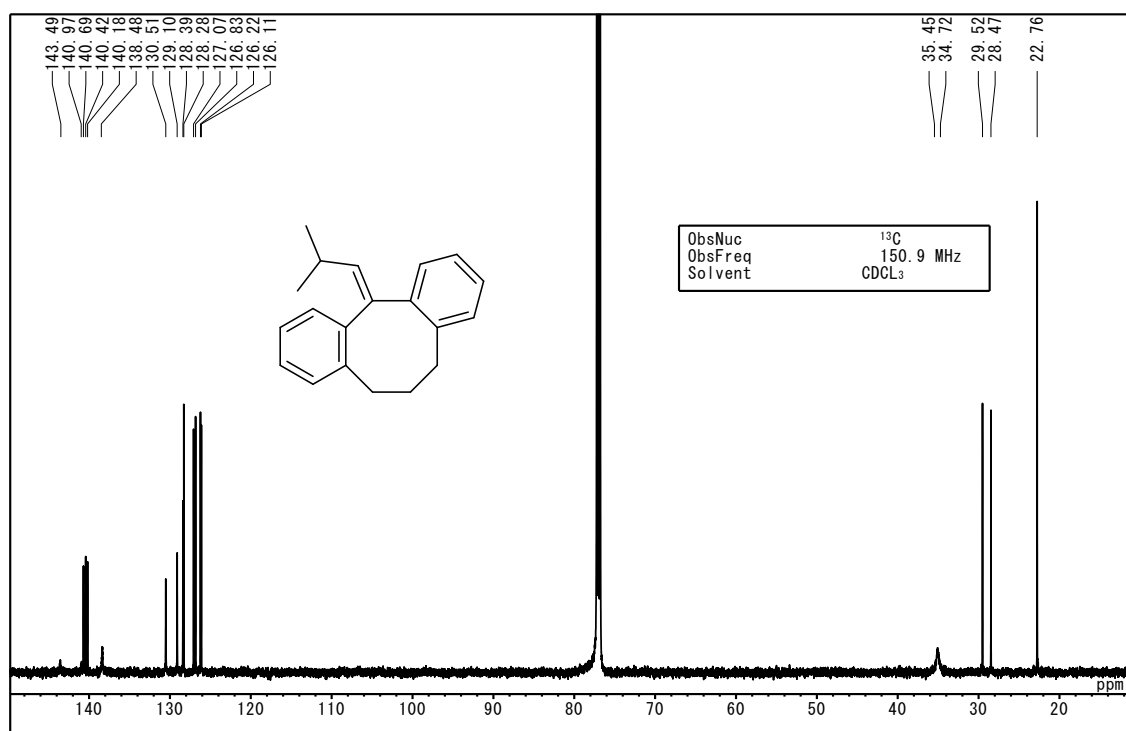

### 12-Butylidene-5,6,7,12-tetrahydrodibenzo[*a,d*]cyclooctene (2c).

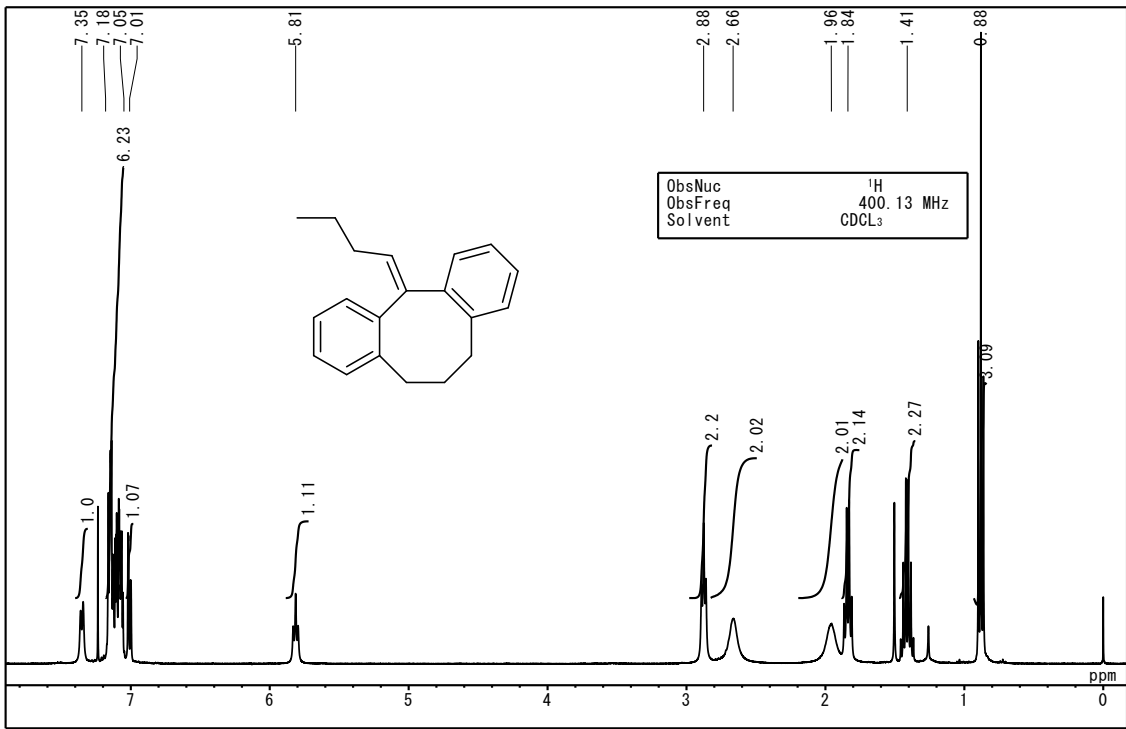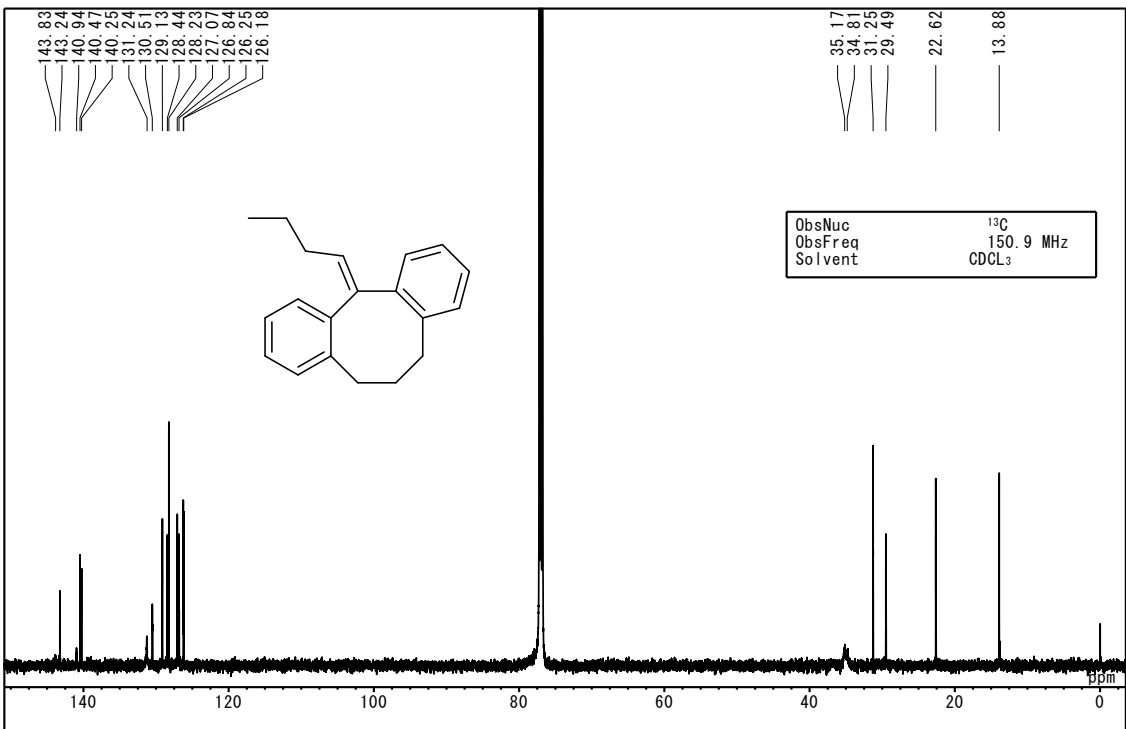

**12-Methylene-5,6,7,12-tetrahydrodibenzo[*a,d*]cyclooctene (2e').**

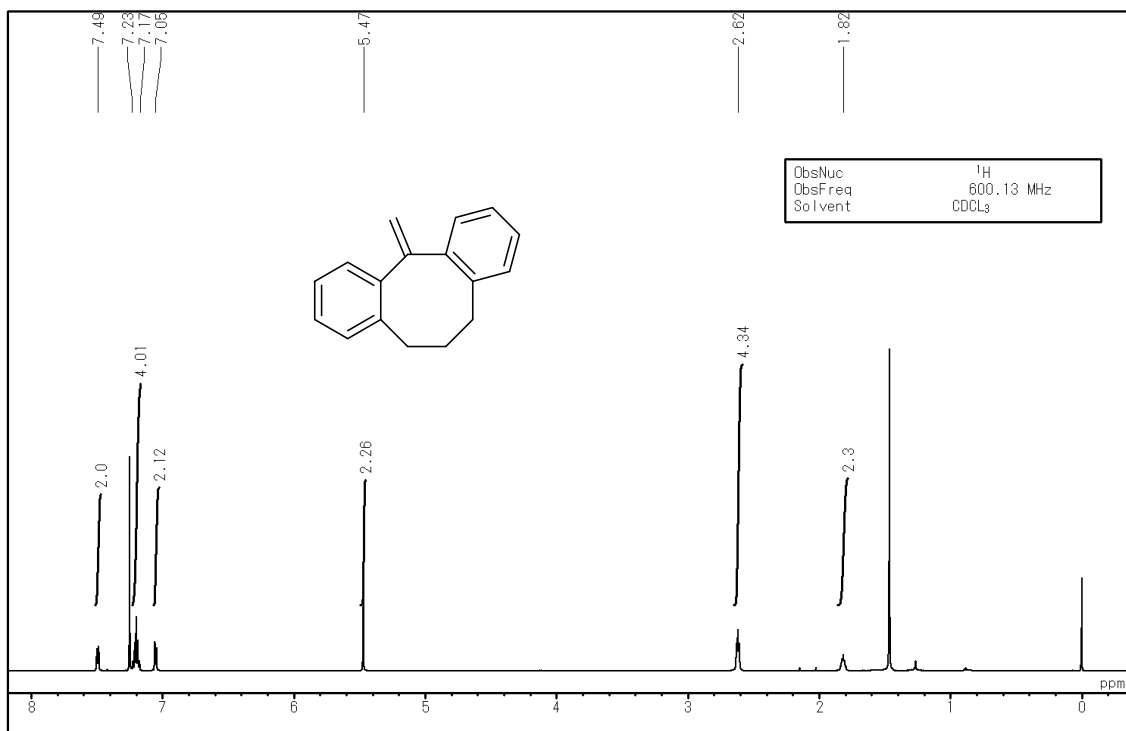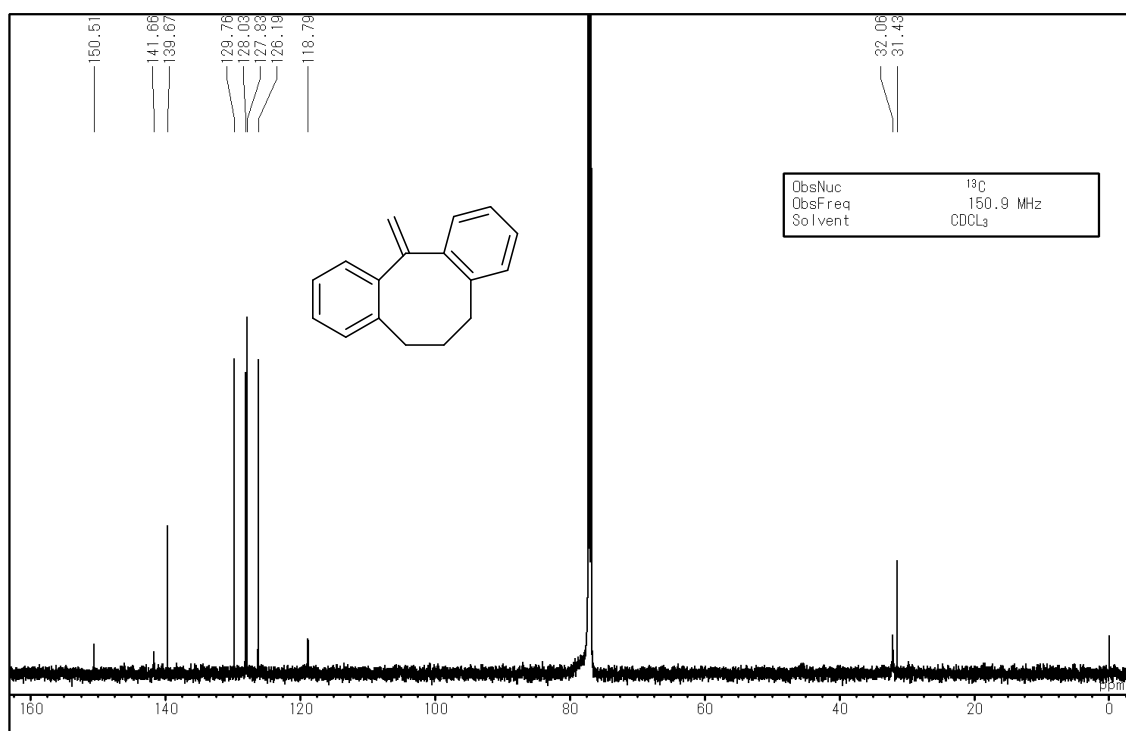

**3-(6,7-Dihydrodibenzo[*a,d*][8]annulen-12(5*H*)-ylidene)-*N,N*-dimethylpropan-1-amine (2f).**

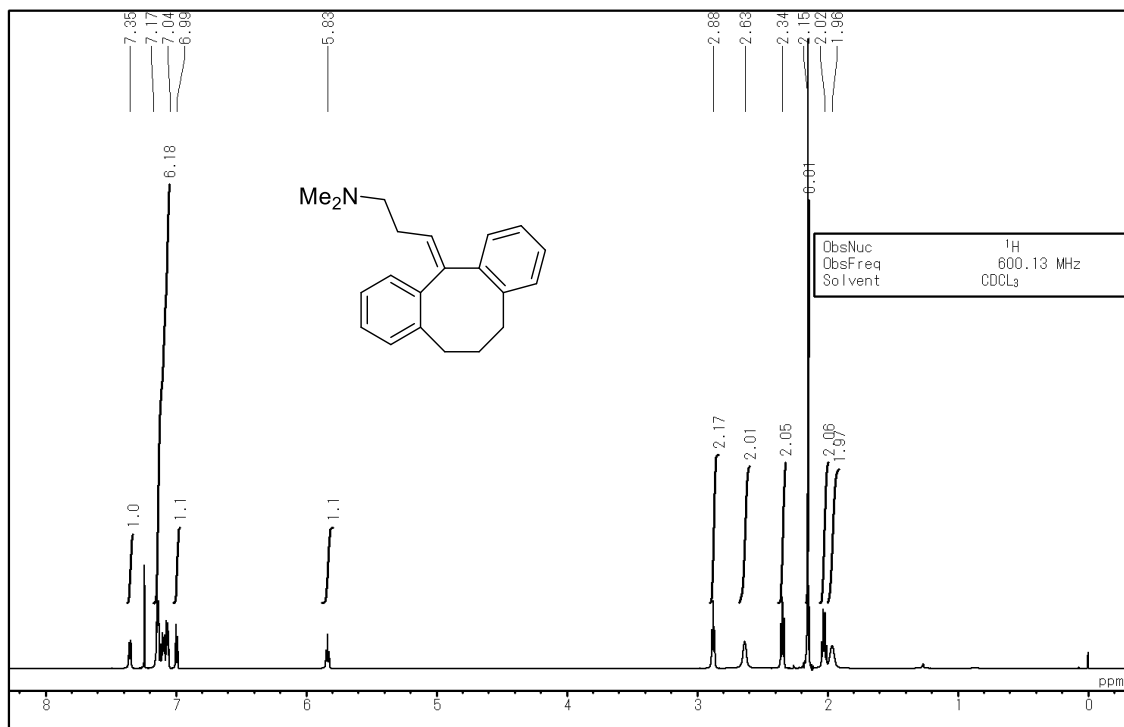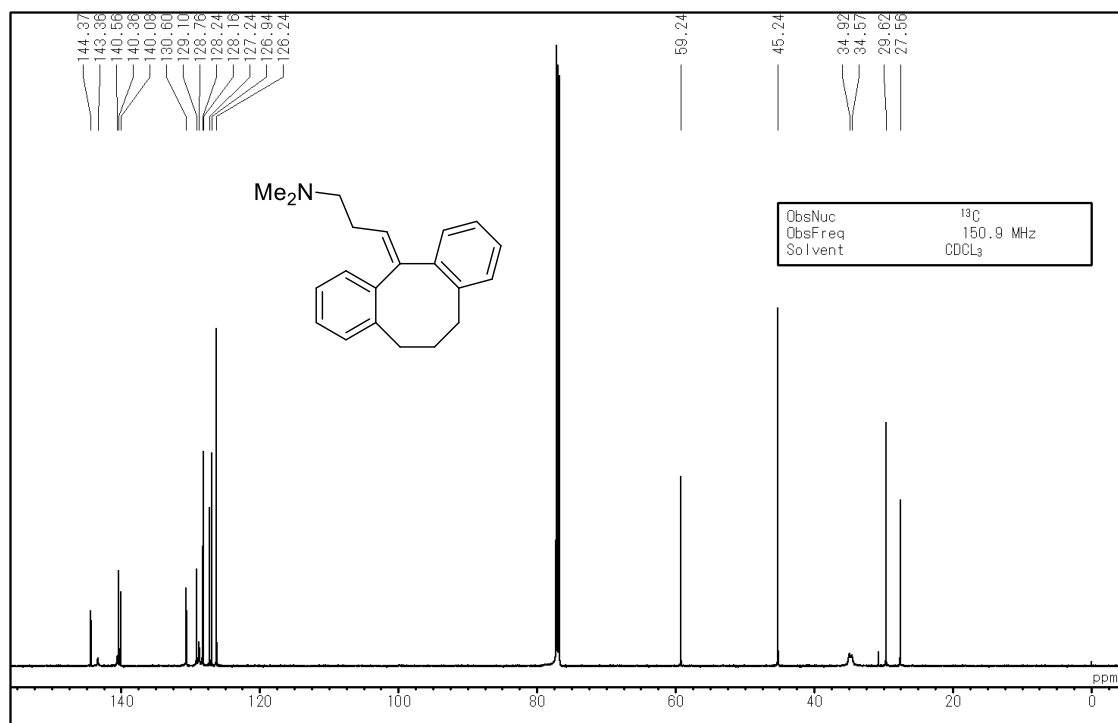



**3-(6,7-Dihydrodibenzo[*a,d*][8]annulen-12(5*H*)-ylidene)propan-1-ol (2g).**

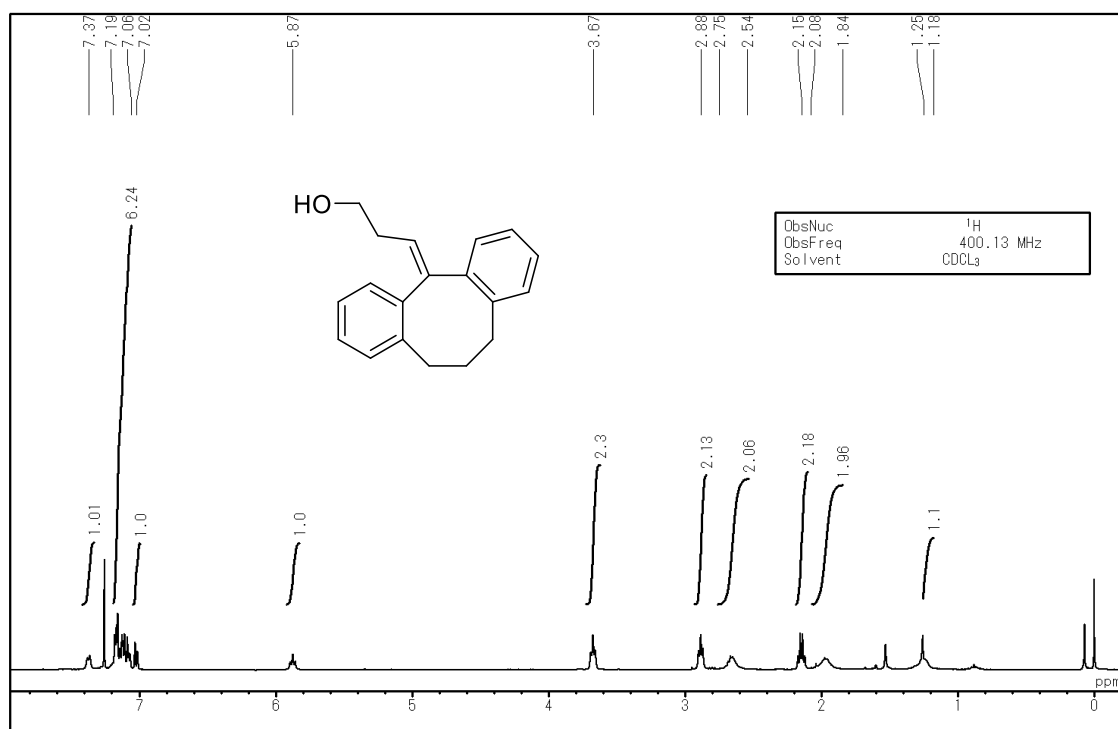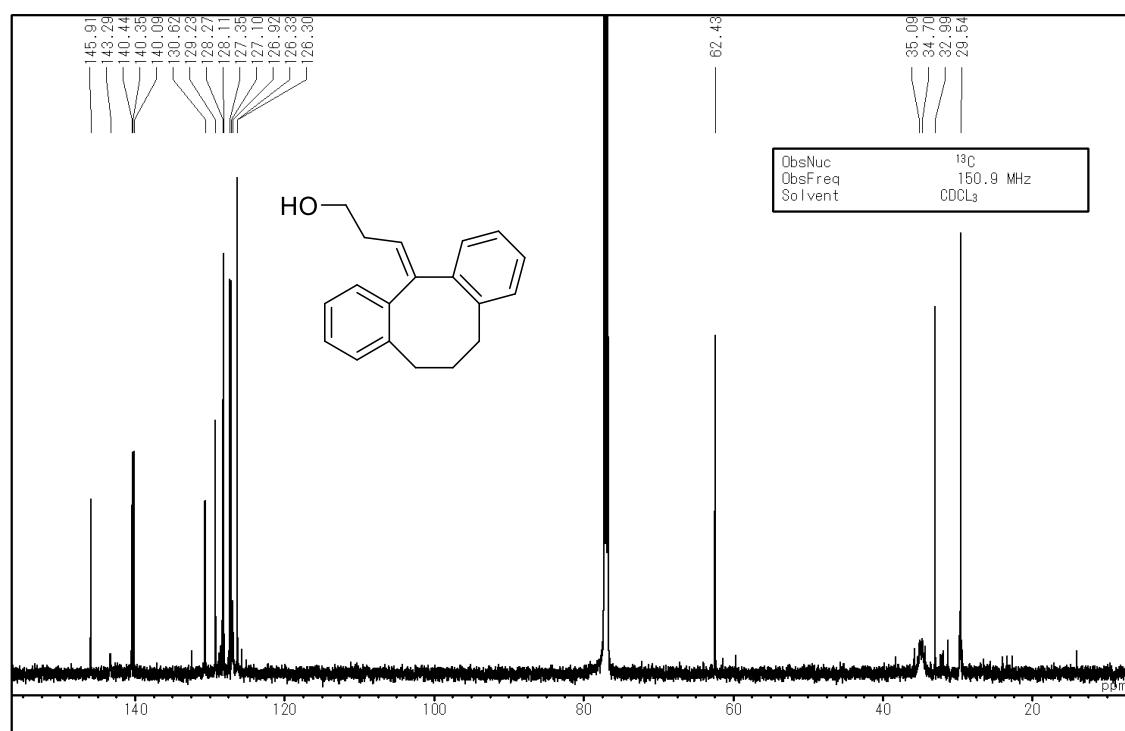

**3-(6,7-Dihydrodibenzo[*a,d*][8]annulen-12(5*H*)-ylidene)propan-1-amine (2h).**

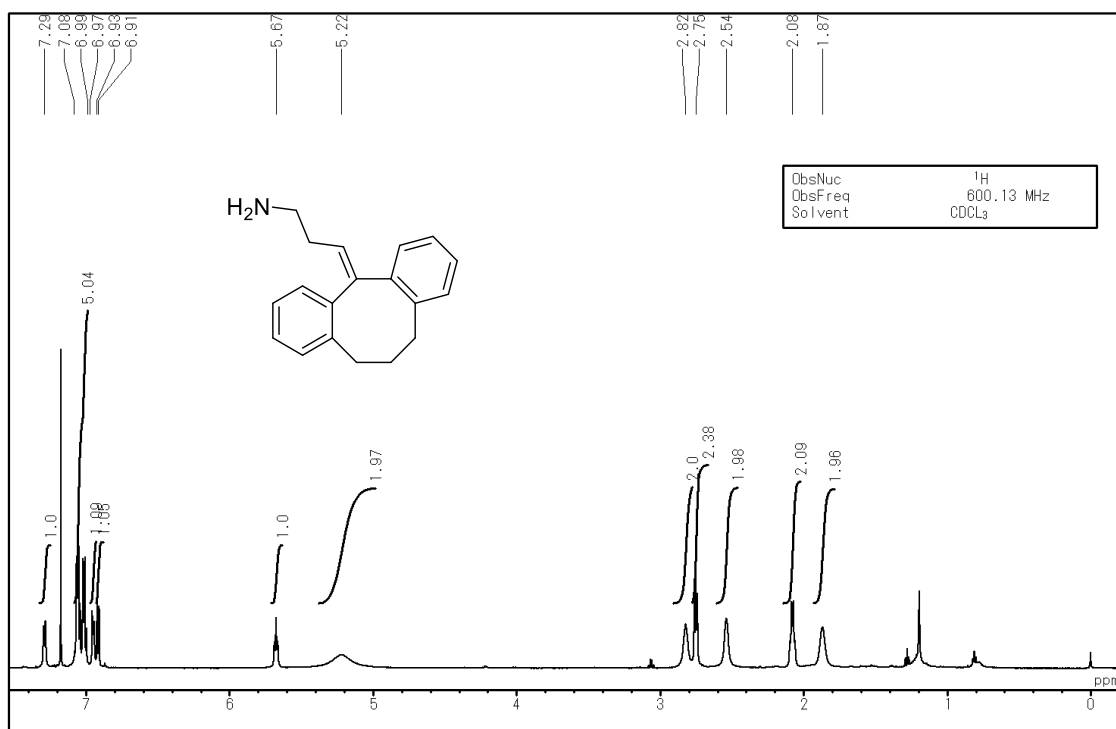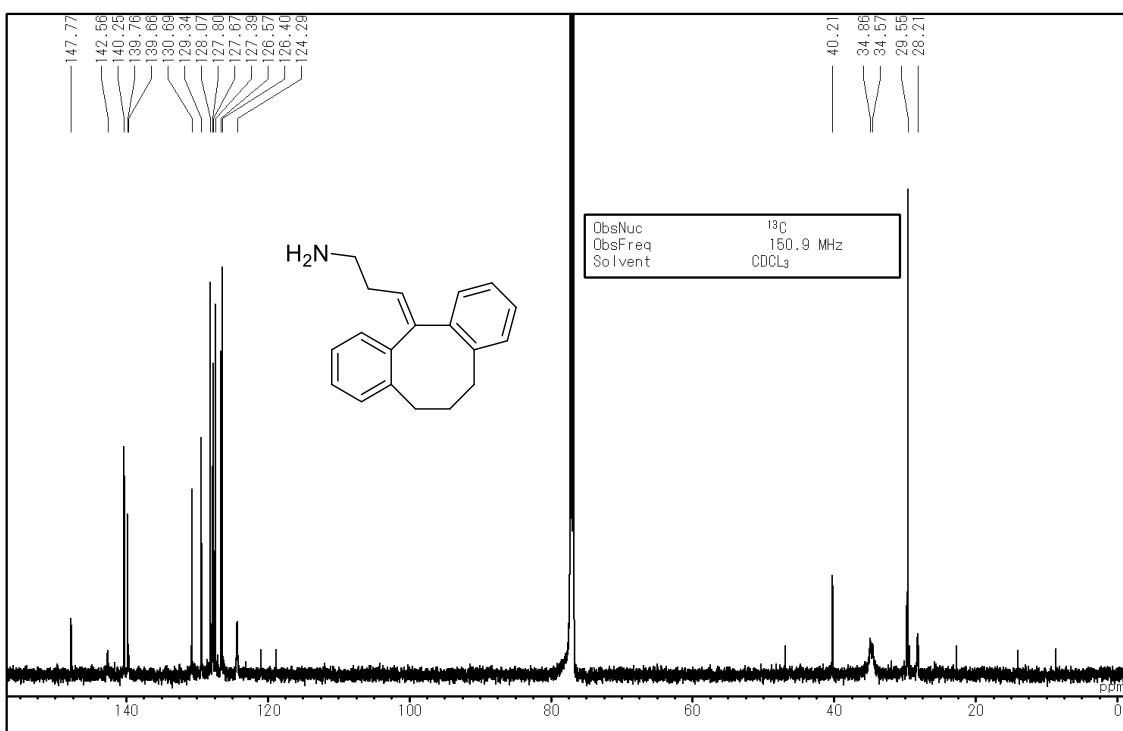

**(*E*)-12-(2,2-Dimethylpropylidene)-2-methoxy-5,6,7,12-tetrahydro-dibenzo[*a,d*]-cyclooctene (*E*-2i).**

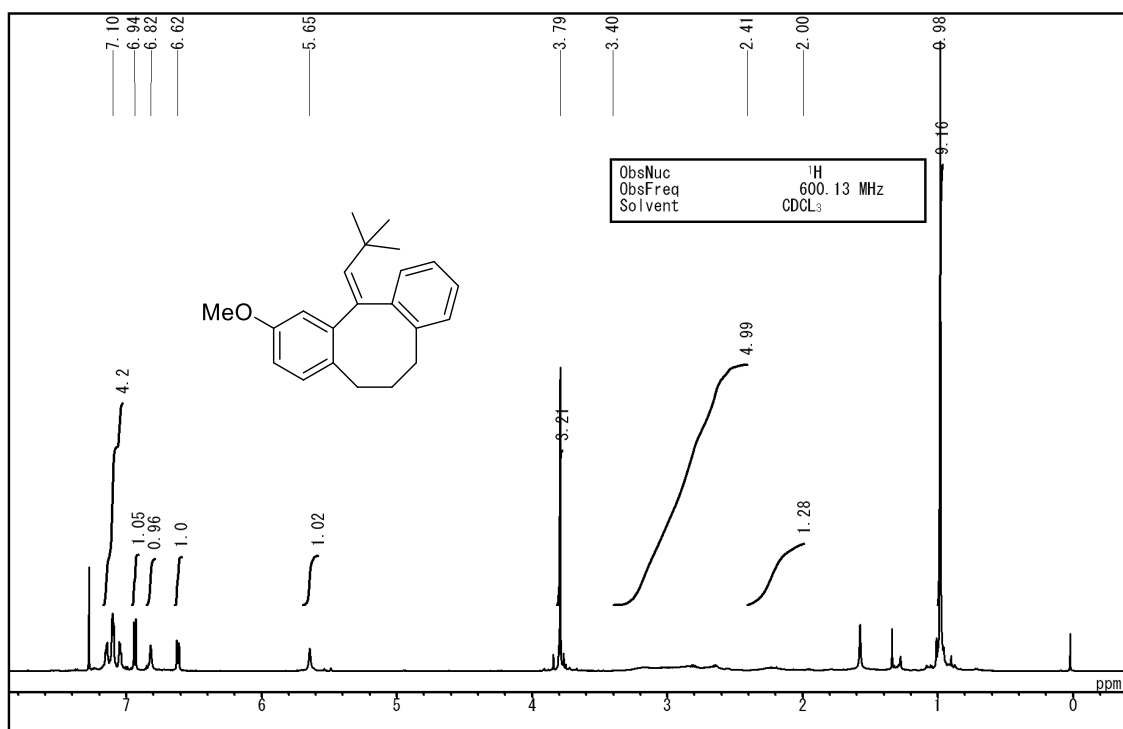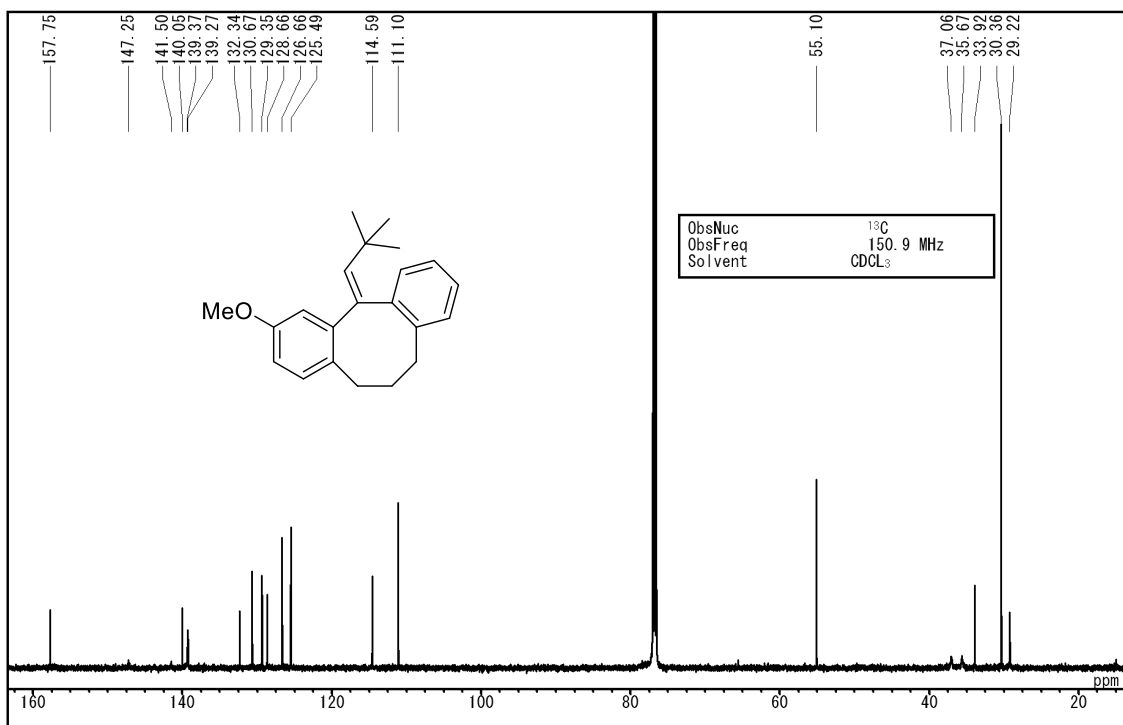

**(Z)-12-(2,2-Dimethylpropylidene)-2-methoxy-5,6,7,12-tetrahydro-dibenzo[*a,d*]-cyclooctene (Z-2i).**

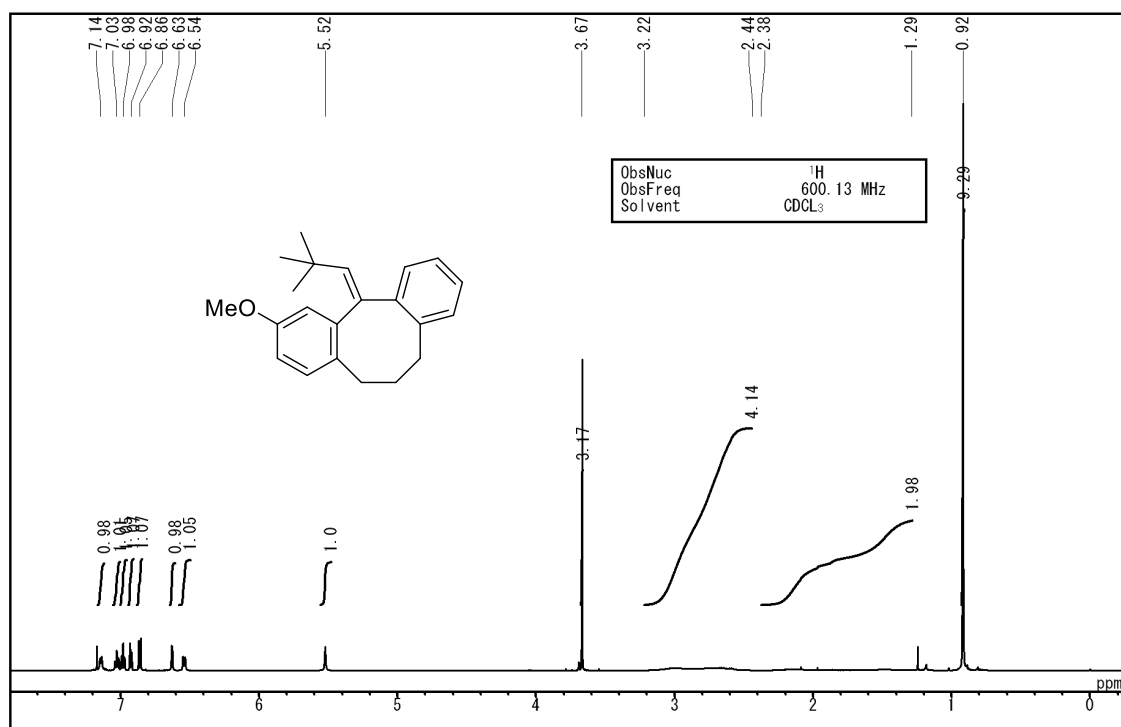

**(*E*)-12-(2,2-Dimethylpropylidene)-2-methyl-5,6,7,12-tetrahydridibenzo[*a,d*]-cyclooctene (*E*-2j).**

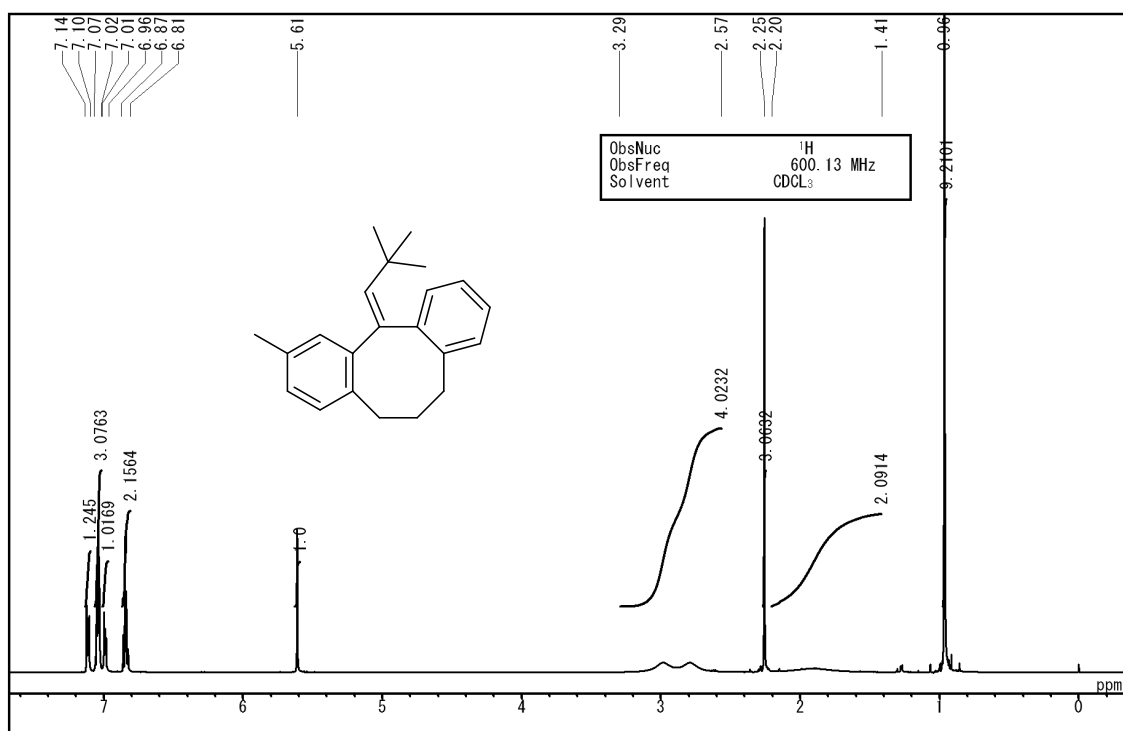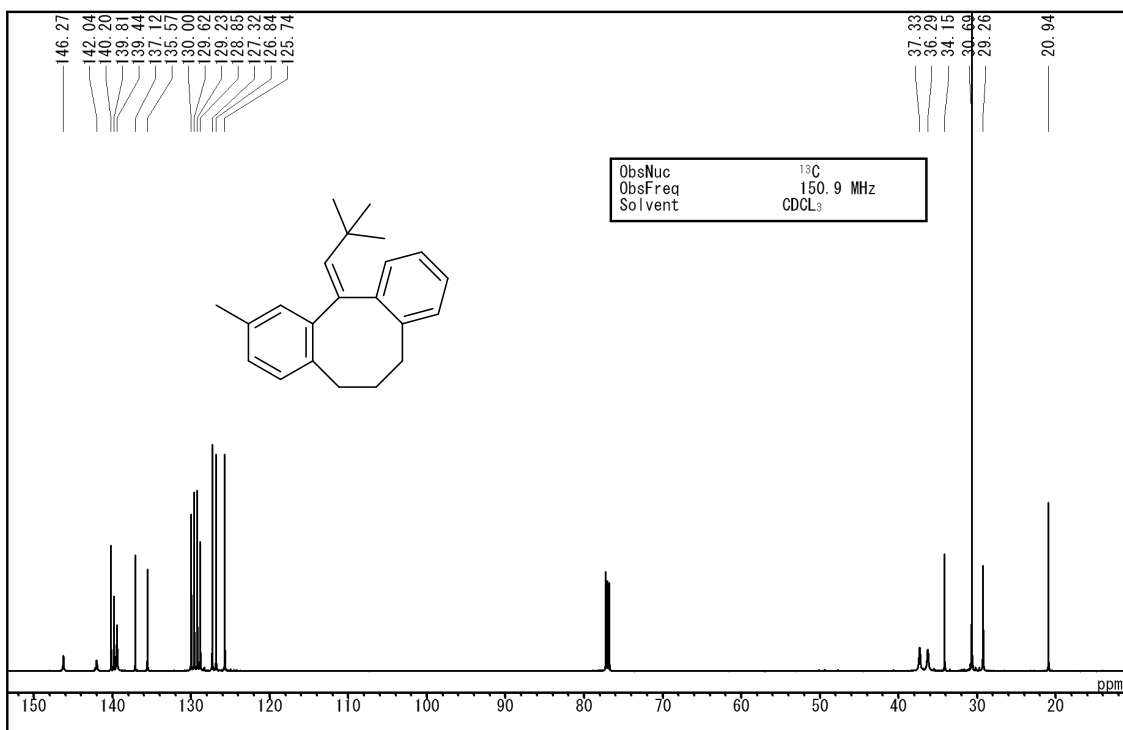

**(Z)-12-(2,2-Dimethylpropylidene)-2-methyl-5,6,7,12-tetrahydro-dibenzo[*a,d*]-cyclooctene (Z-2j).**

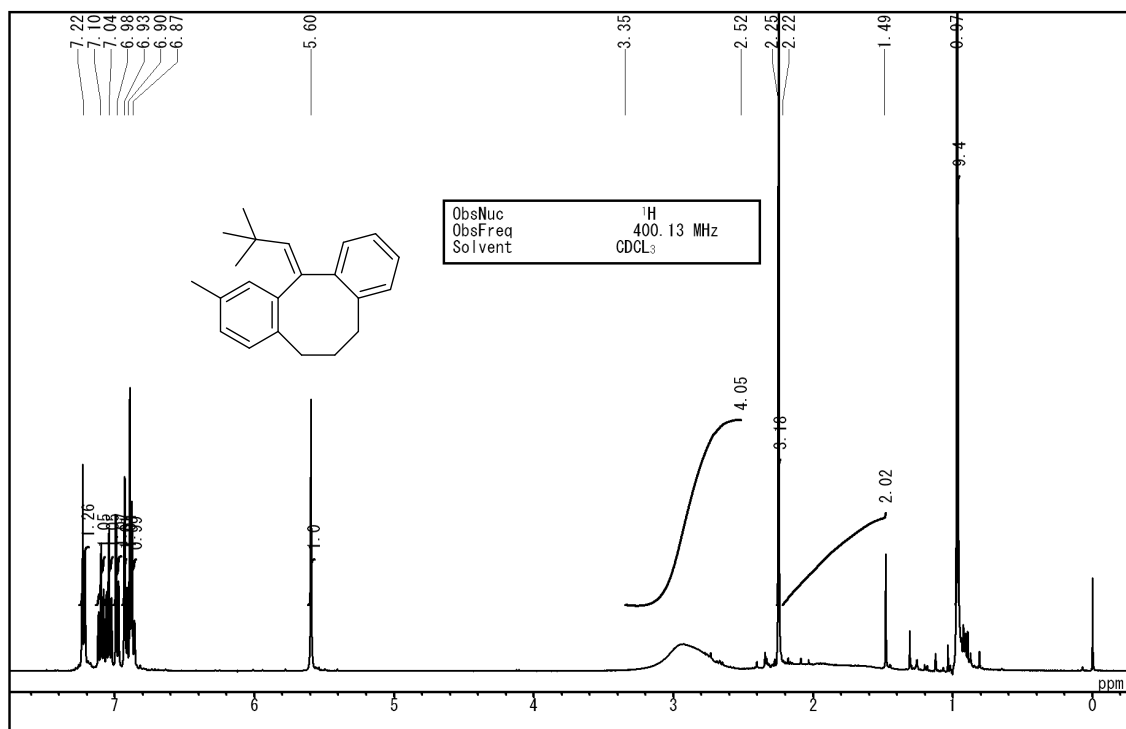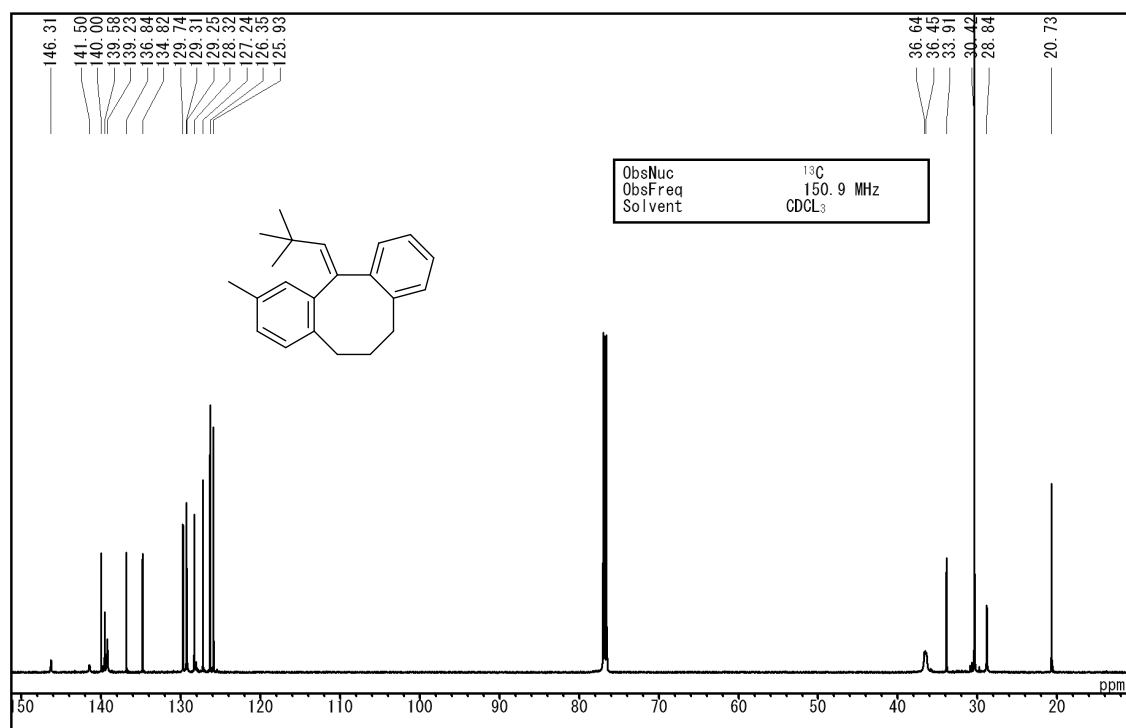

**13-(2,2-Dimethylpropylidene)-6,7,8,13-tetrahydro-5*H*-dibenzo[*a,d*]cyclononene (3a).**

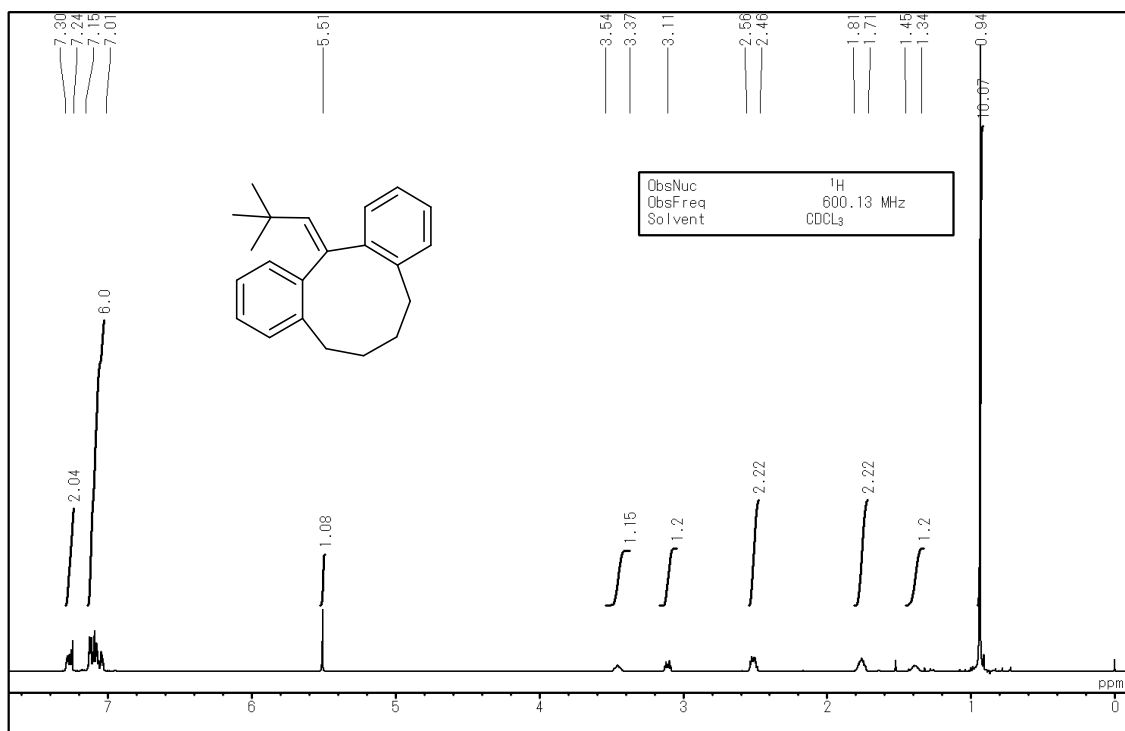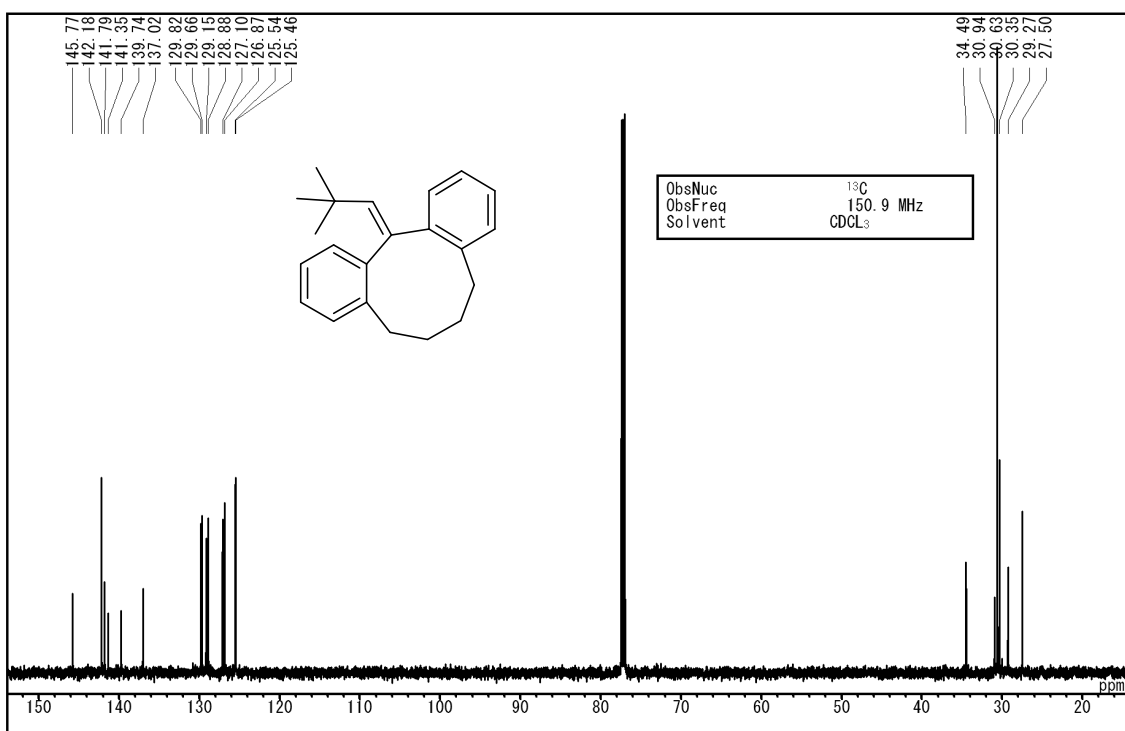

**13-Butylidene-6,7,8,13-tetrahydro-5H-dibenzo[*a,d*]cyclononene (3b).**

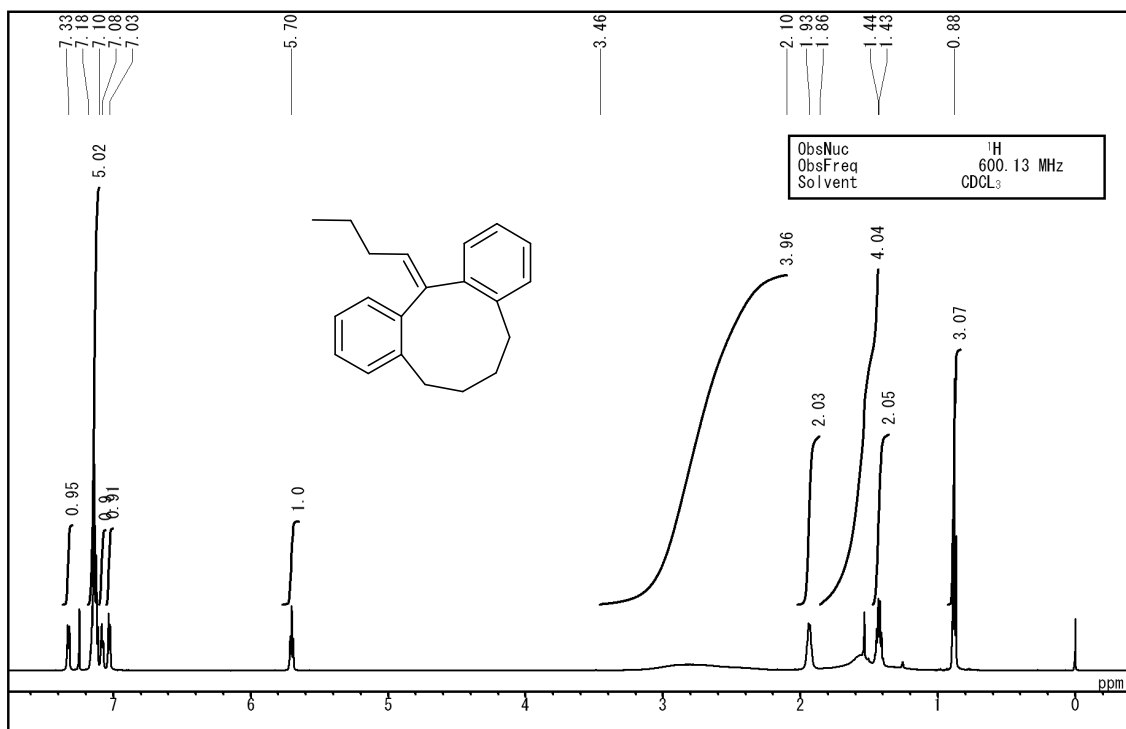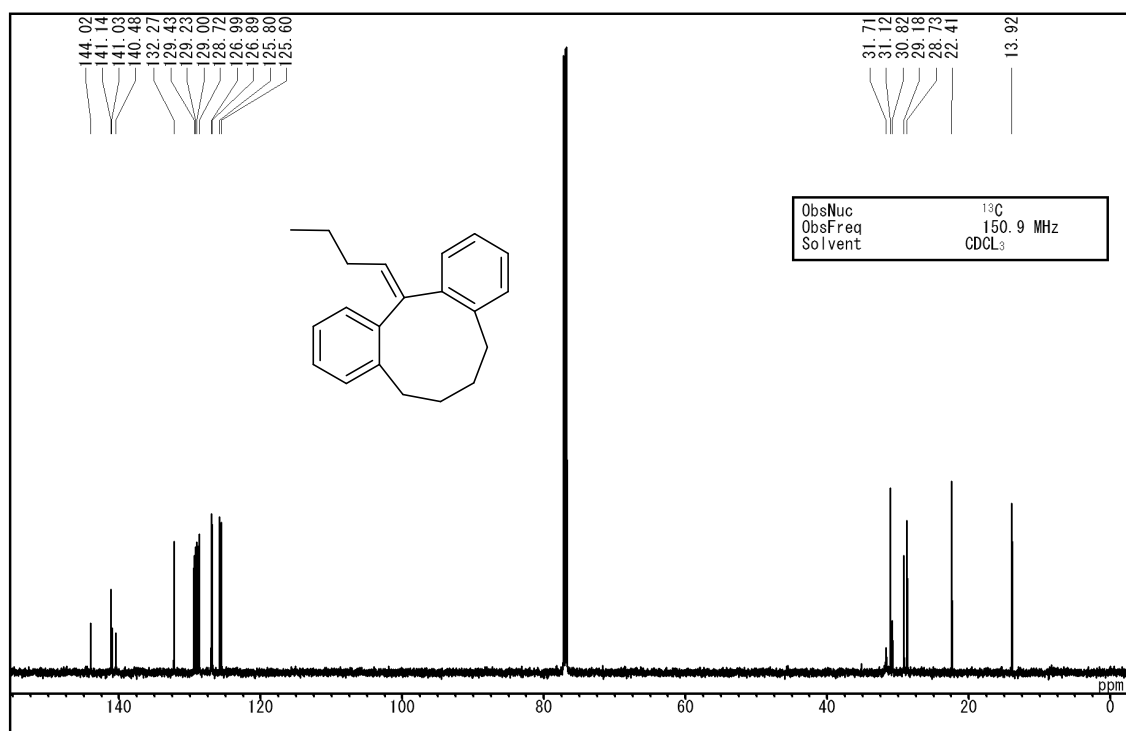



**13-Hexylidene-6,7,8,13-tetrahydro-5*H*-dibenzo[*a,d*]cyclononene (3c).**

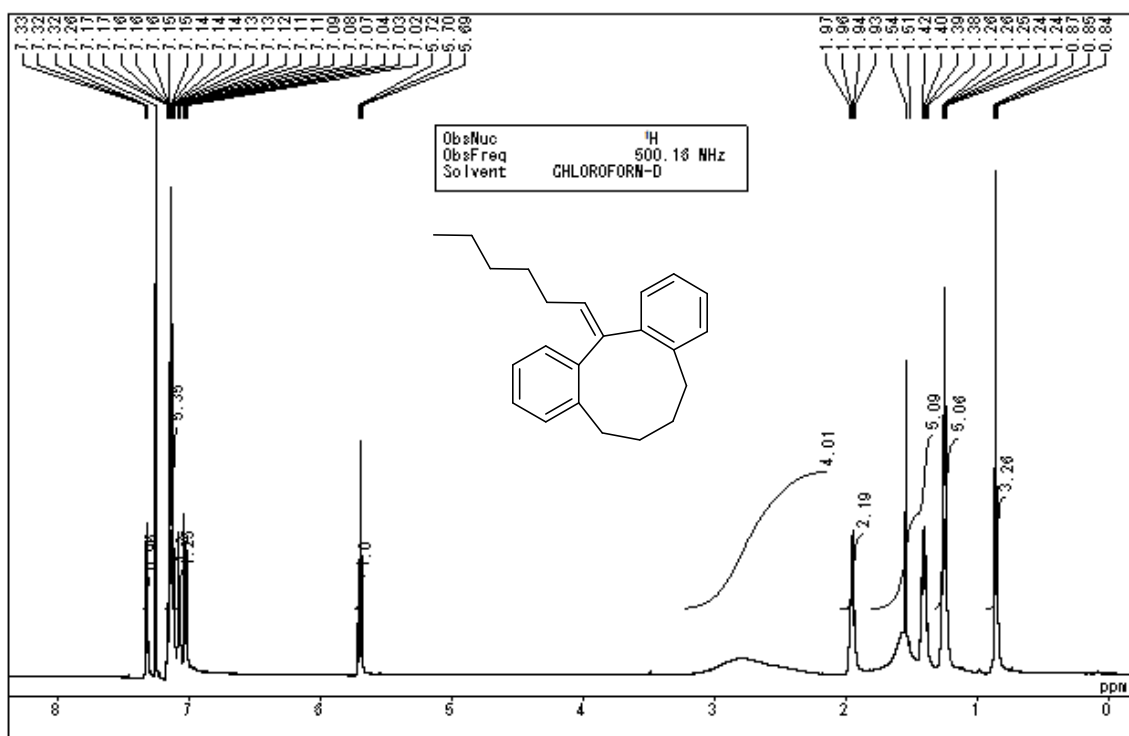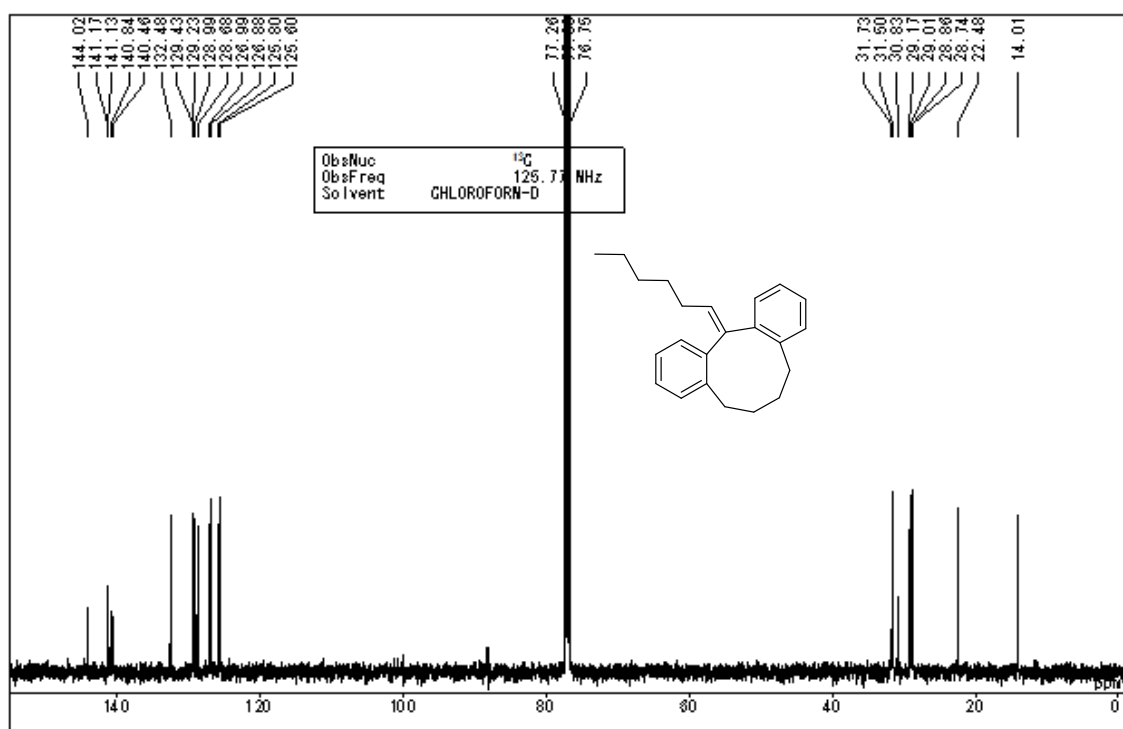

**(E)- and (Z)-13-(2,2-Dimethylpropylidene)-2-methyl-6,7,8,13-tetrahydro-5H-dibenzo[*a,d*]cyclononene (3d).**

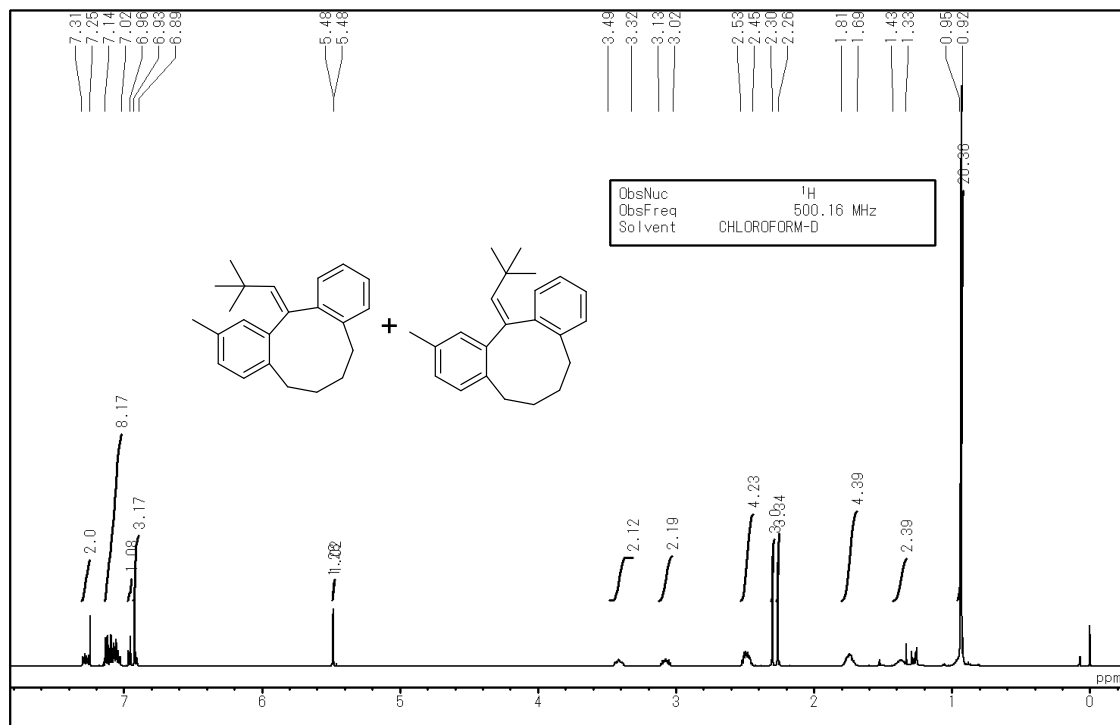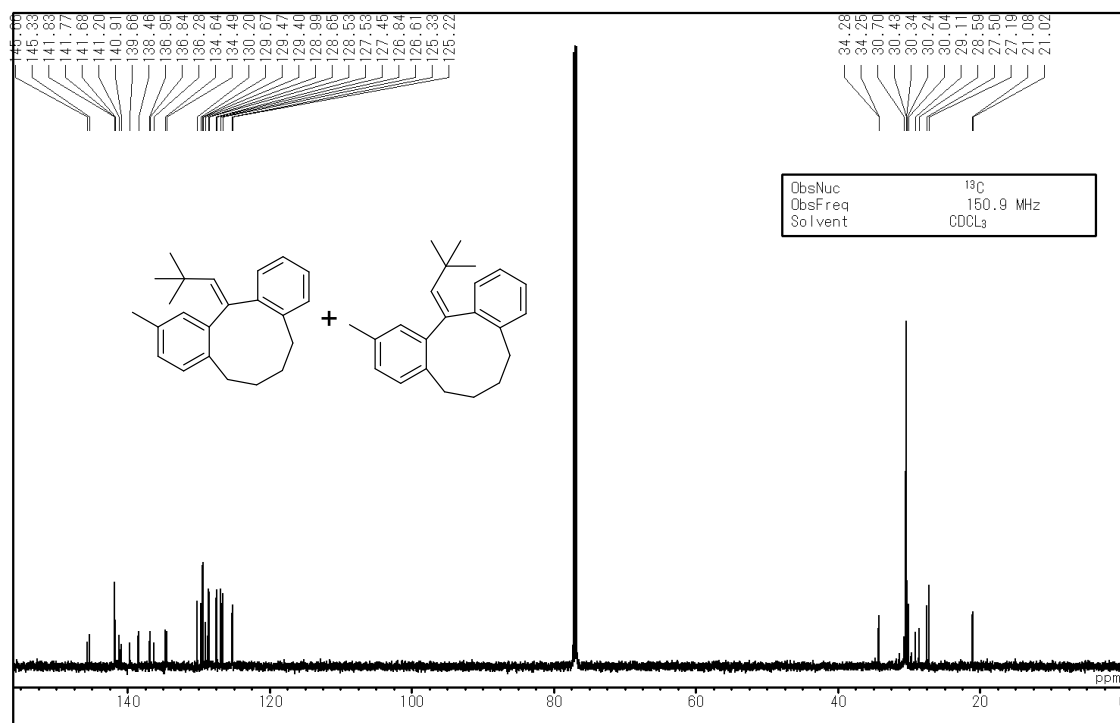

(*E*)- and (*Z*)-13-Butylidene-2-methyl-6,7,8,13-tetrahydro-5*H*-dibenzo[*a,d*]-cyclononene (3e).

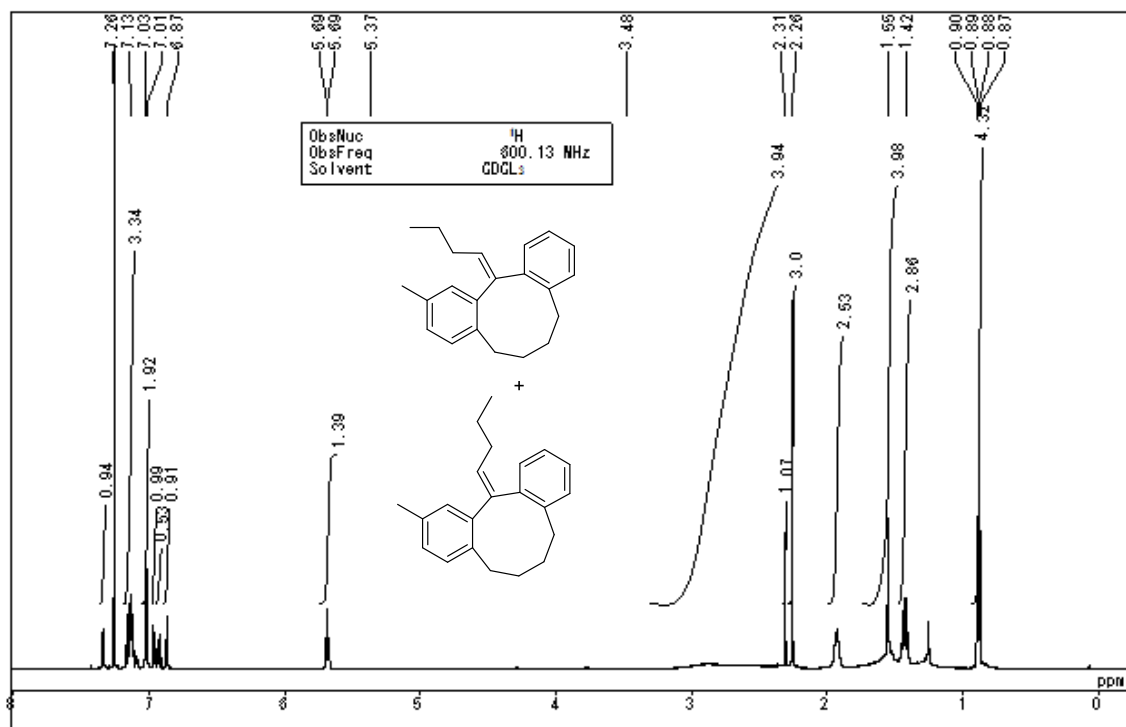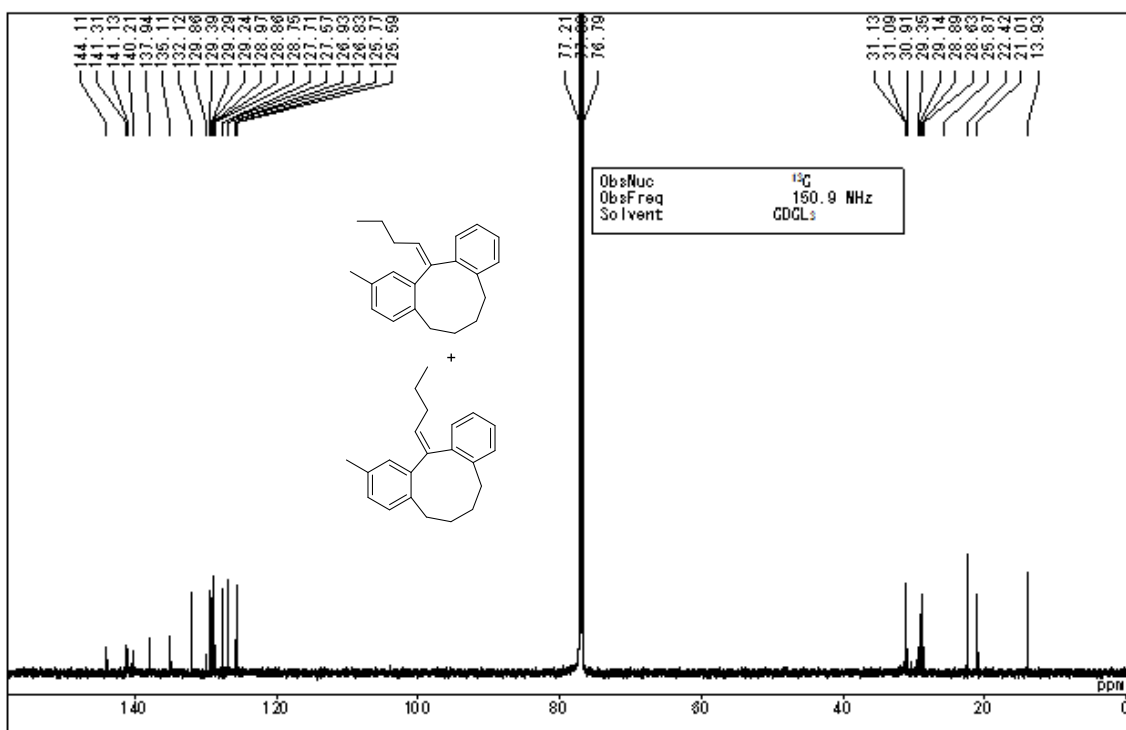

**(E)- and (Z)-13-(2,2-Dimethylpropylidene)-3-methyl-6,7,8,13-tetrahydro-5H-dibenzo[*a,d*]cyclononene (3f).**

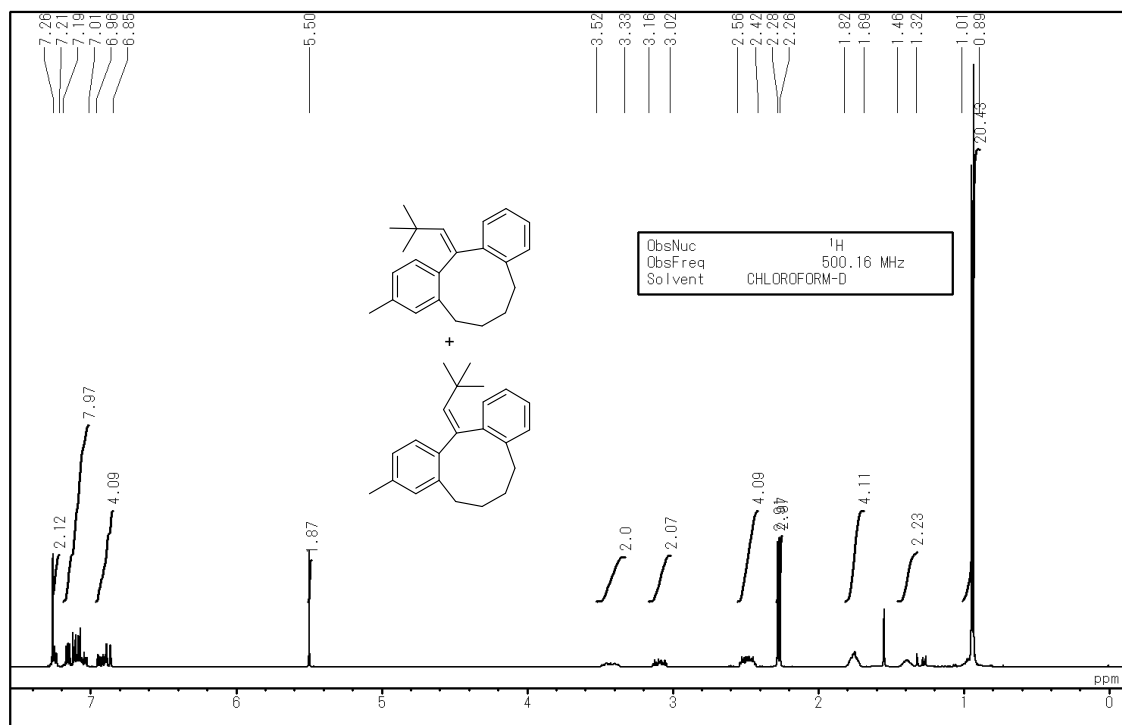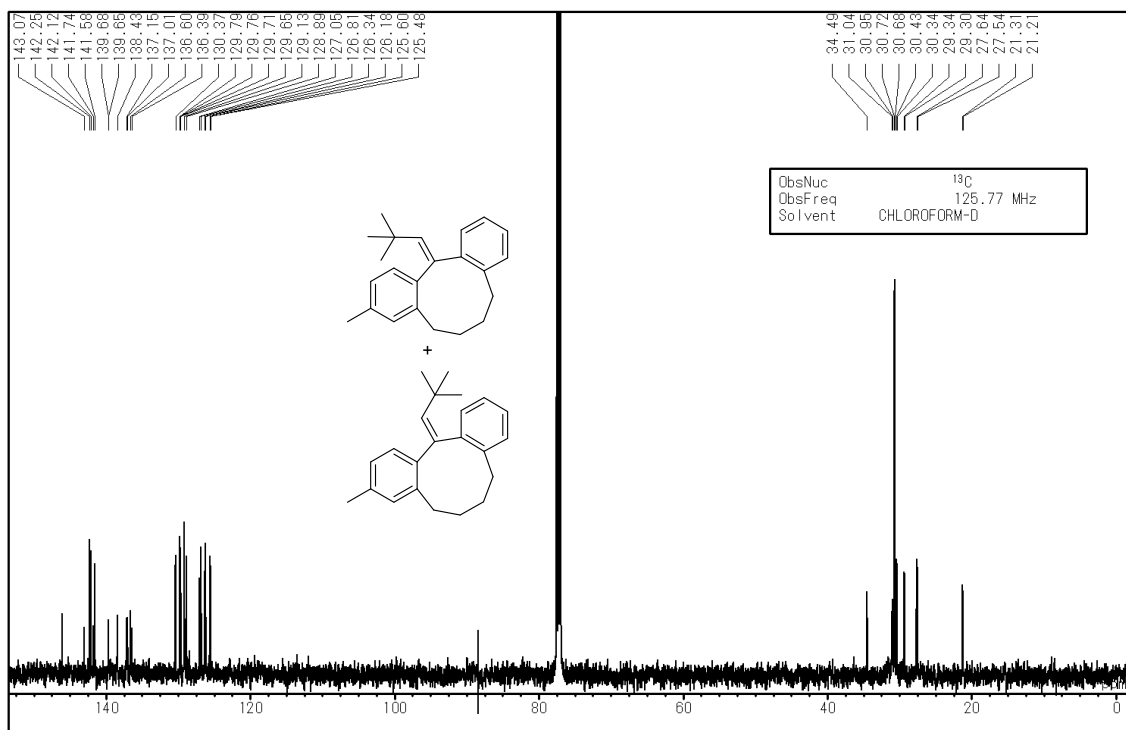

**(E)- and (Z)-13-Butylidene-3-methyl-6,7,8,13-tetrahydro-5H-dibenzo[a,d]-cyclononene (3g).**

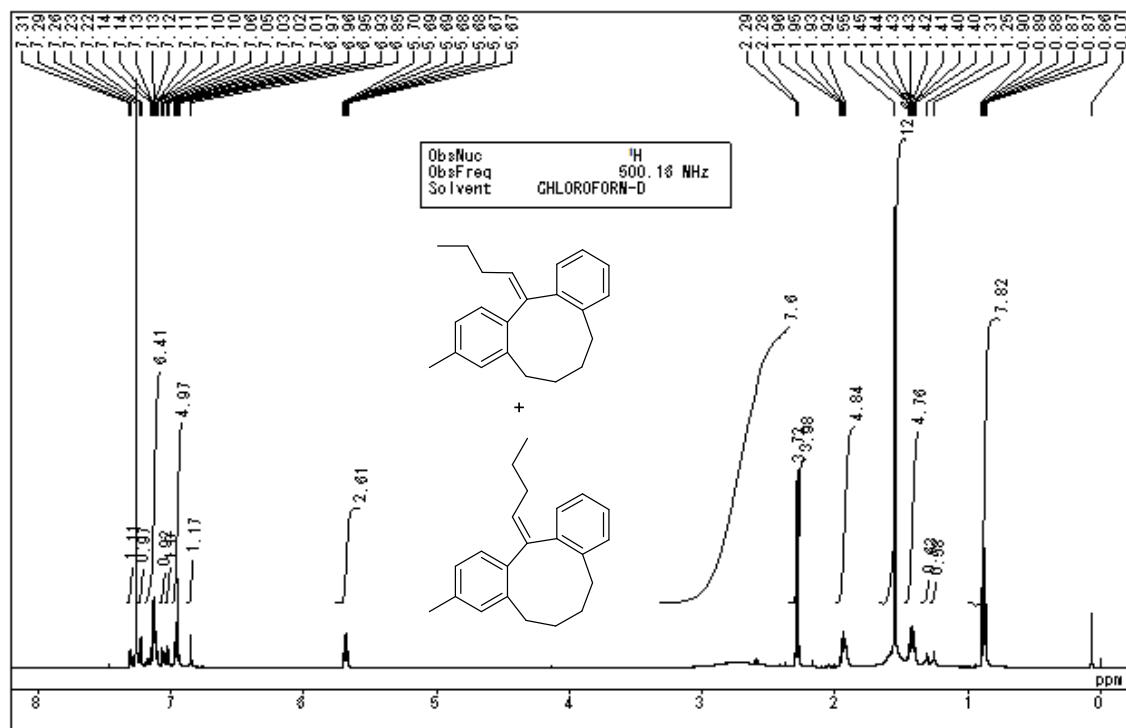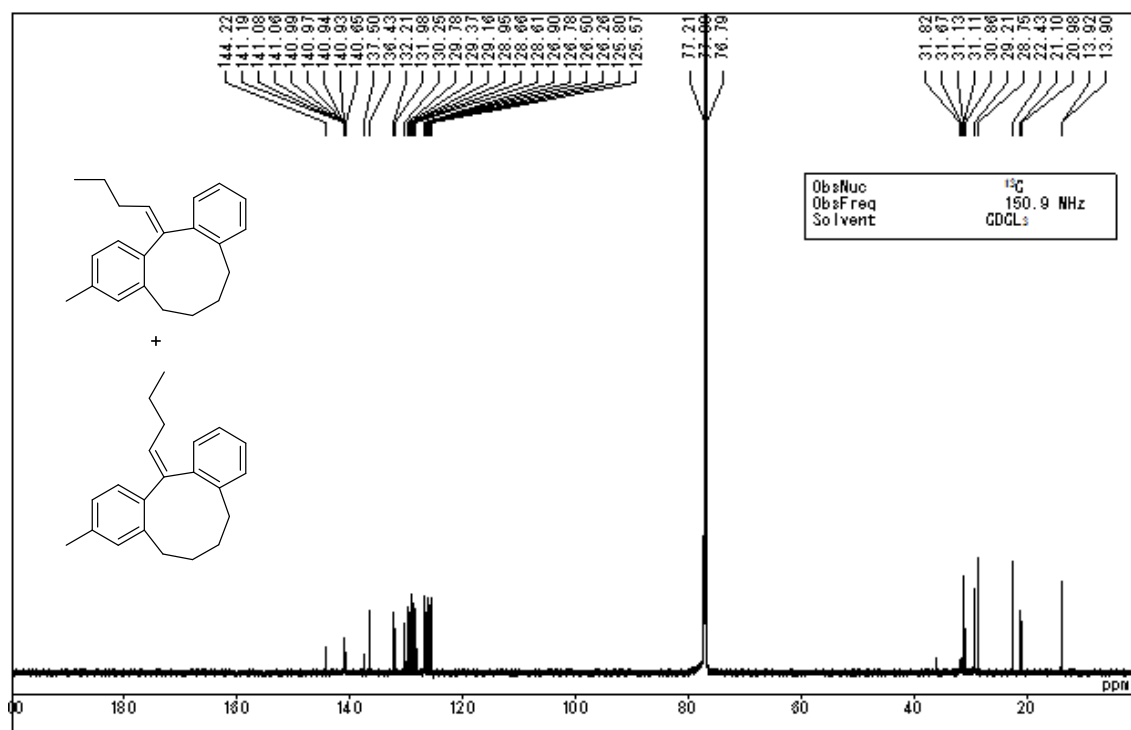

**5,6,7,8-Tetrahydro-13H-dibenzo[a,d][9]annulen-13-one (6).**

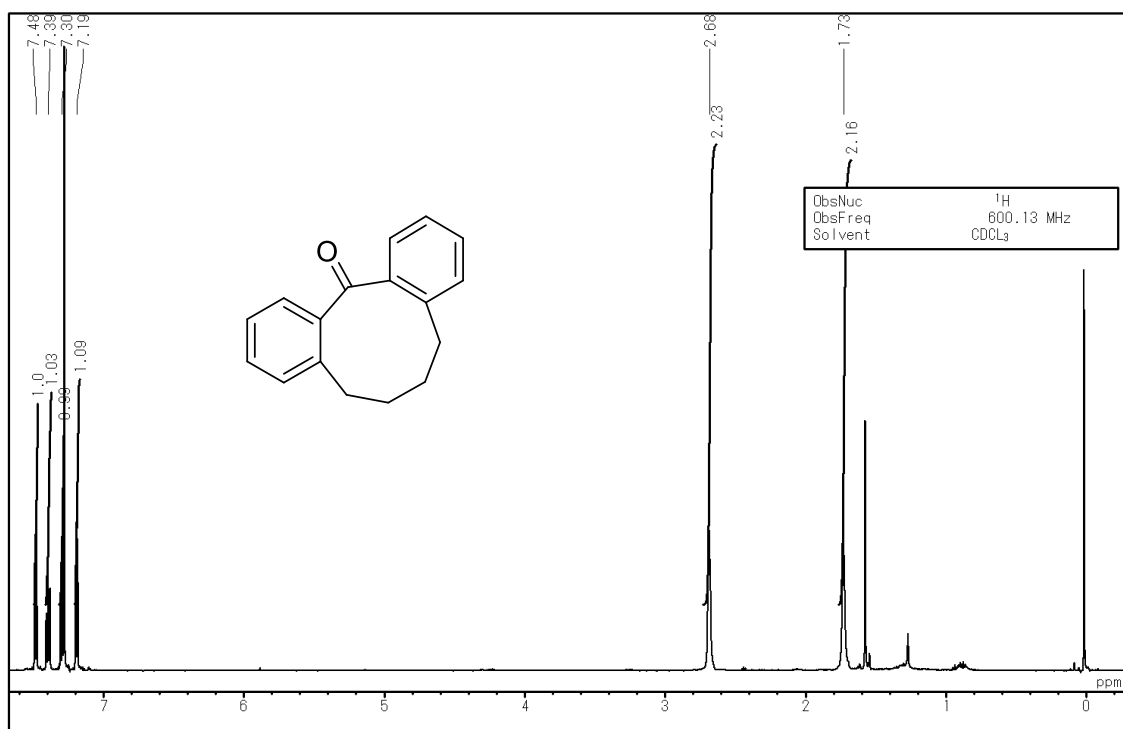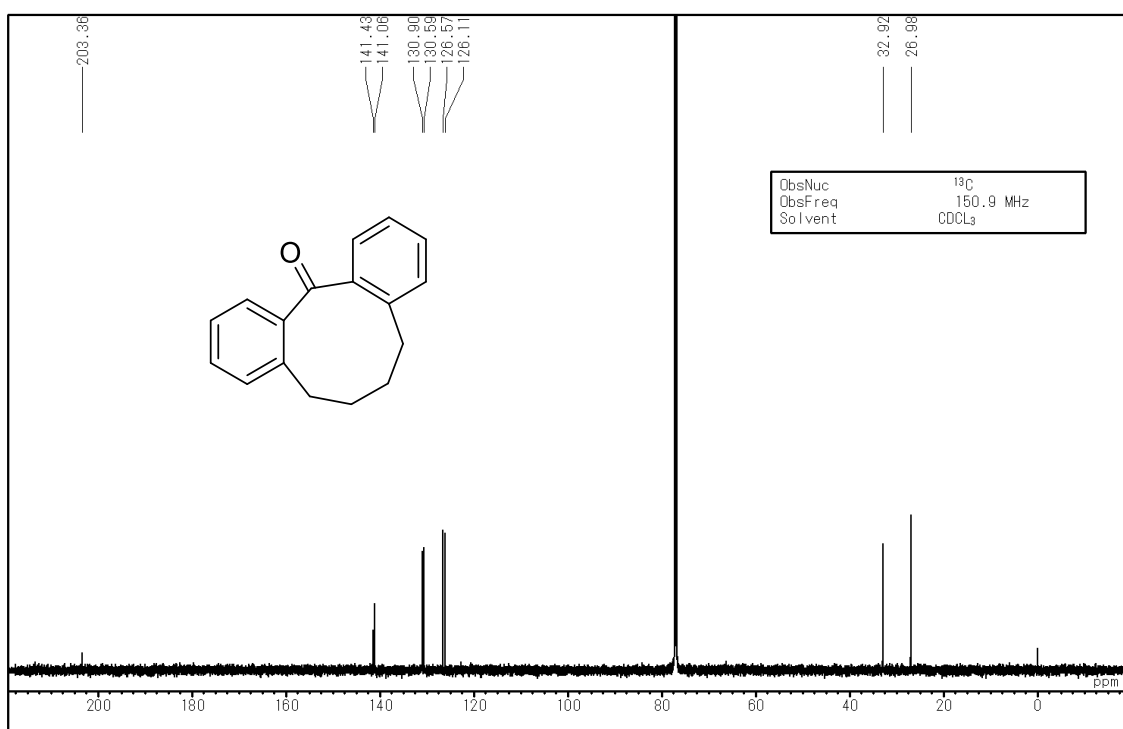

***N,N*-Dimethyl-4-(2-phenethylphenyl)but-3-yn-1-amine (7a).**

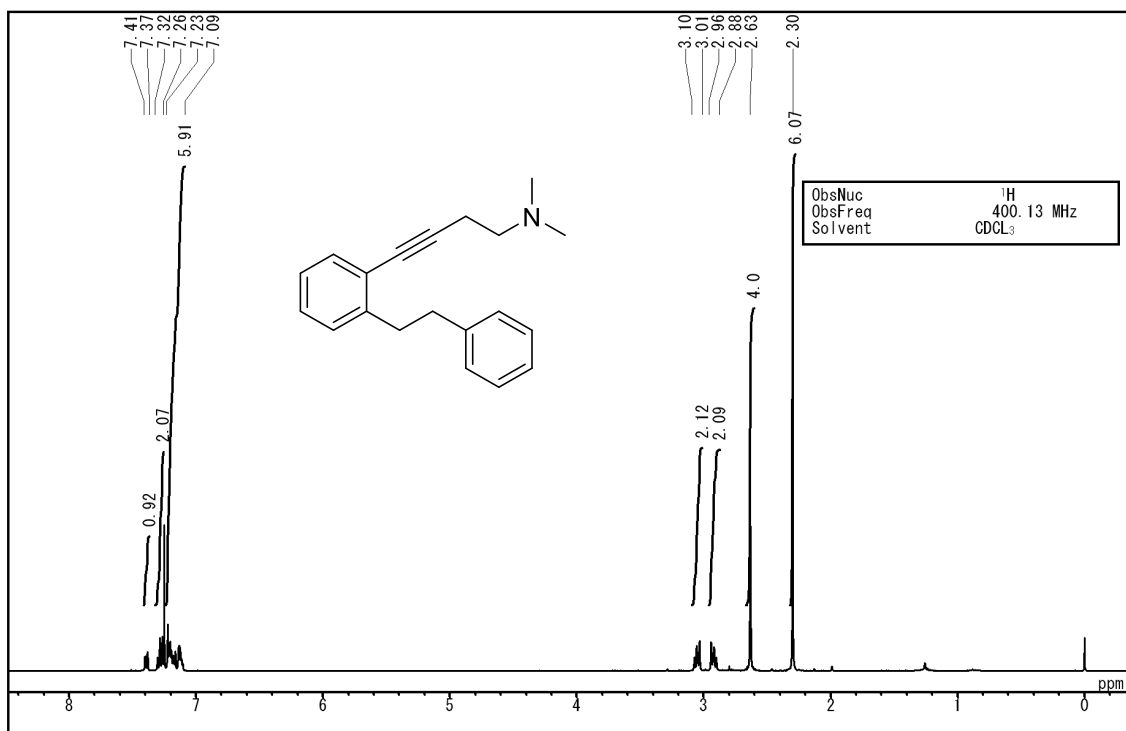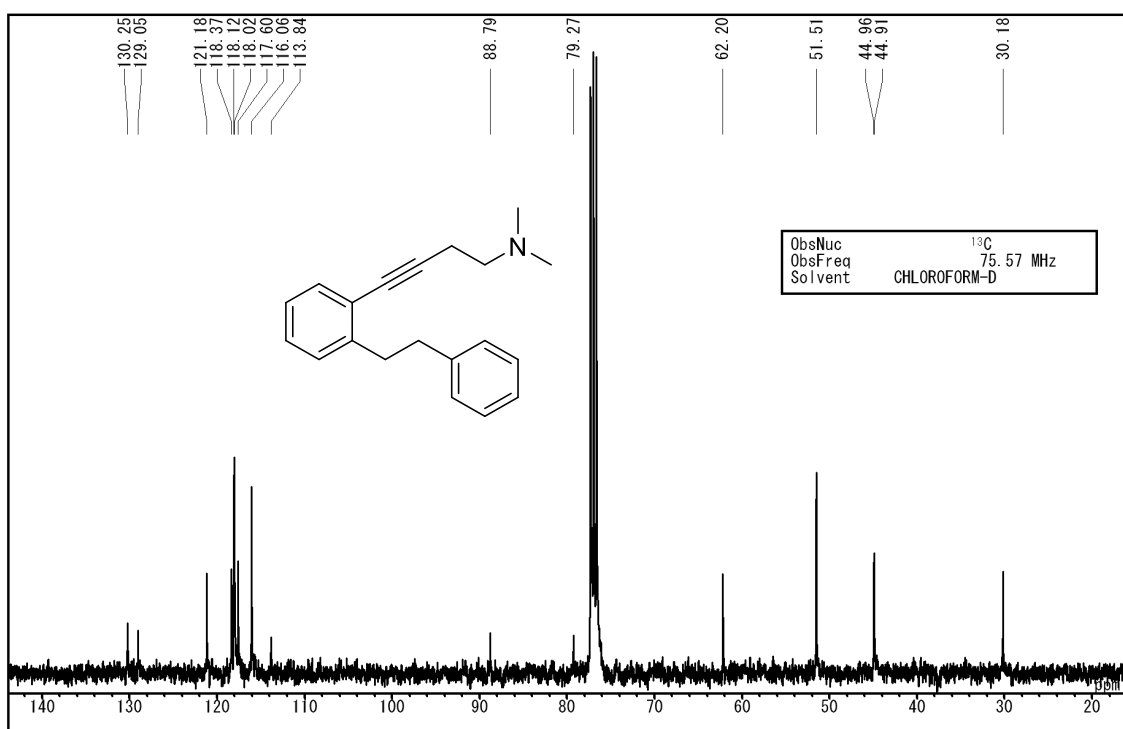

***N*-Methyl-4-(2-phenethylphenyl)but-3-yn-1-amine (7b).**

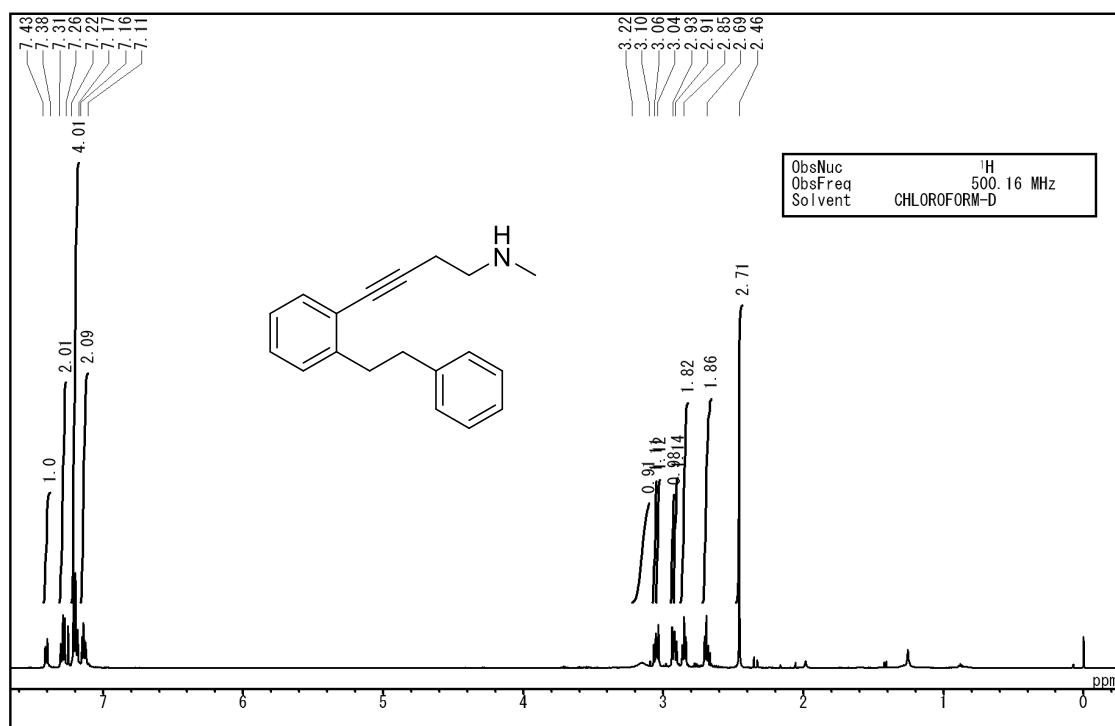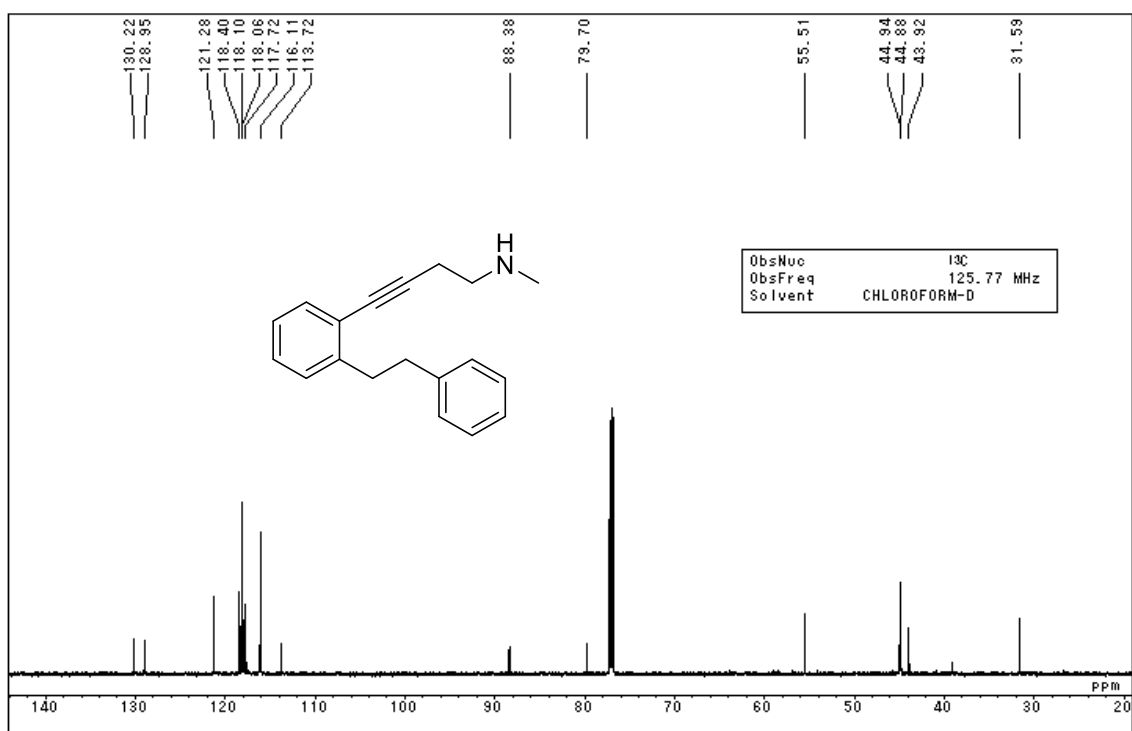



**1-(3,3-Dimethylbut-1-yn-1-yl)-2-phenethylbenzene (7c).**

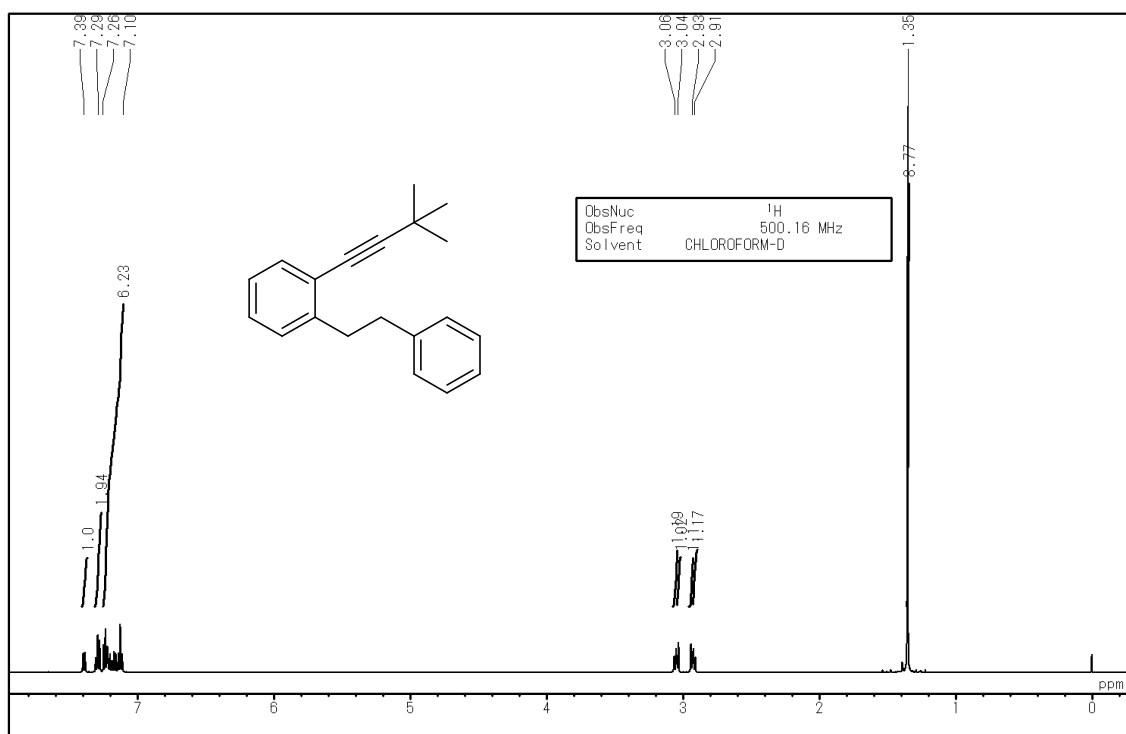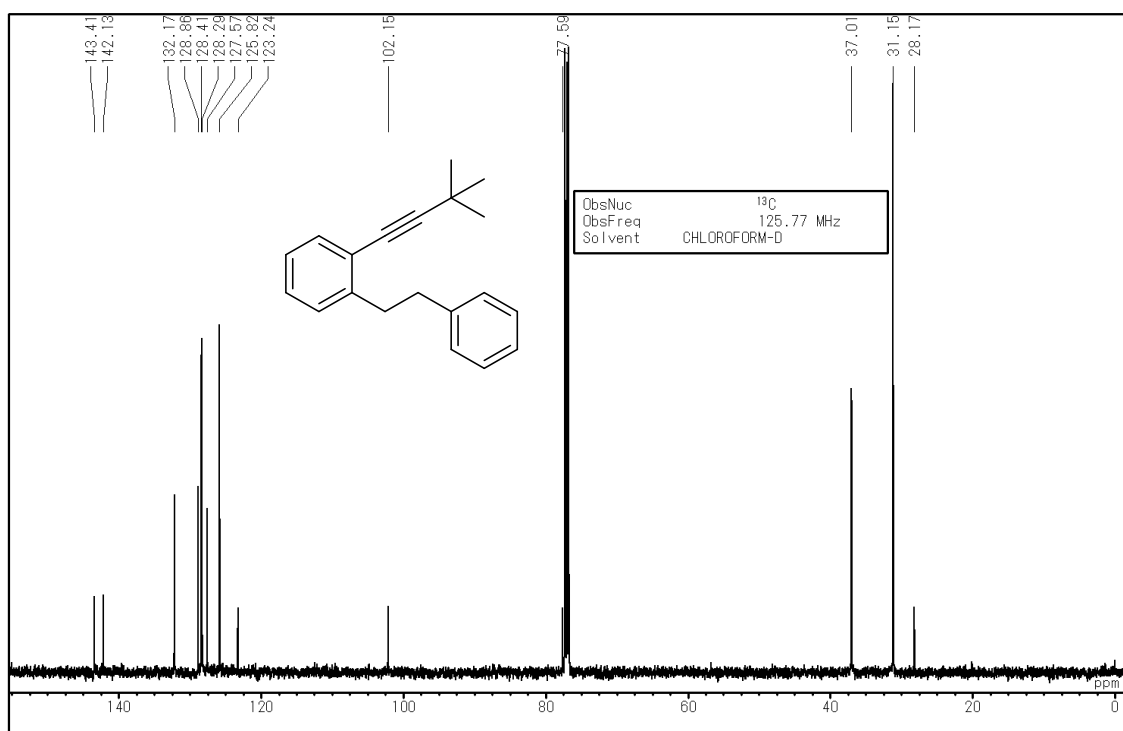

**1-(Pent-1-yn-1-yl)-2-phenethylbenzene (7d).**

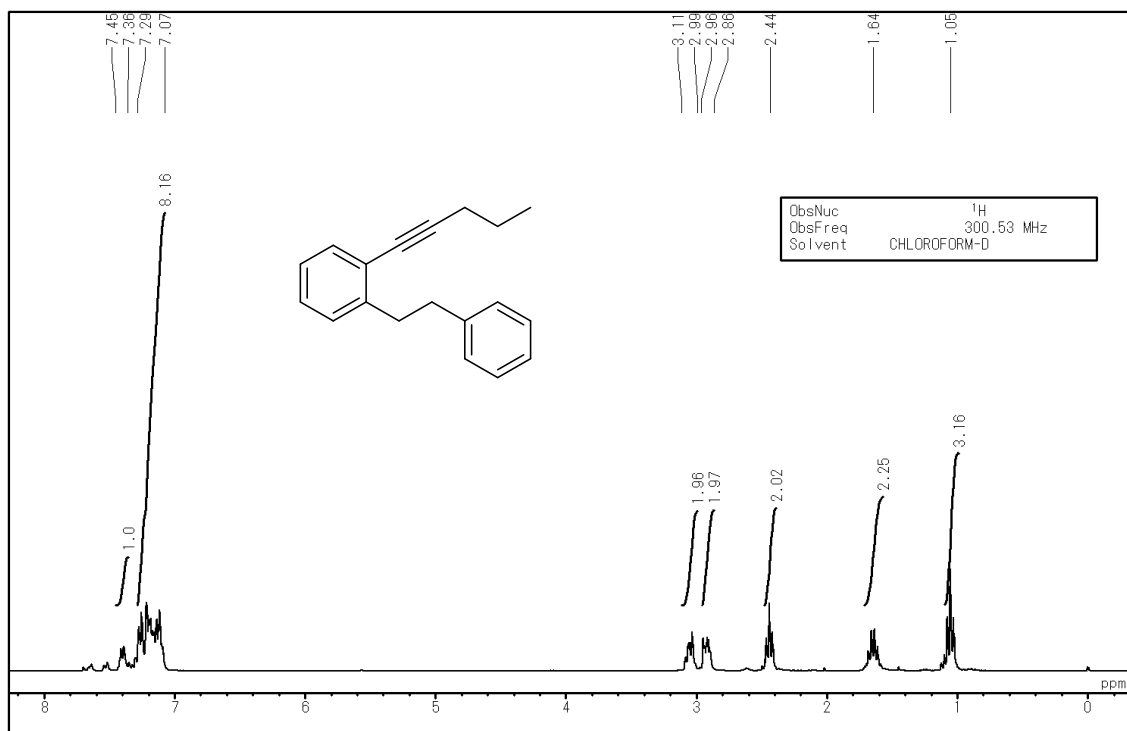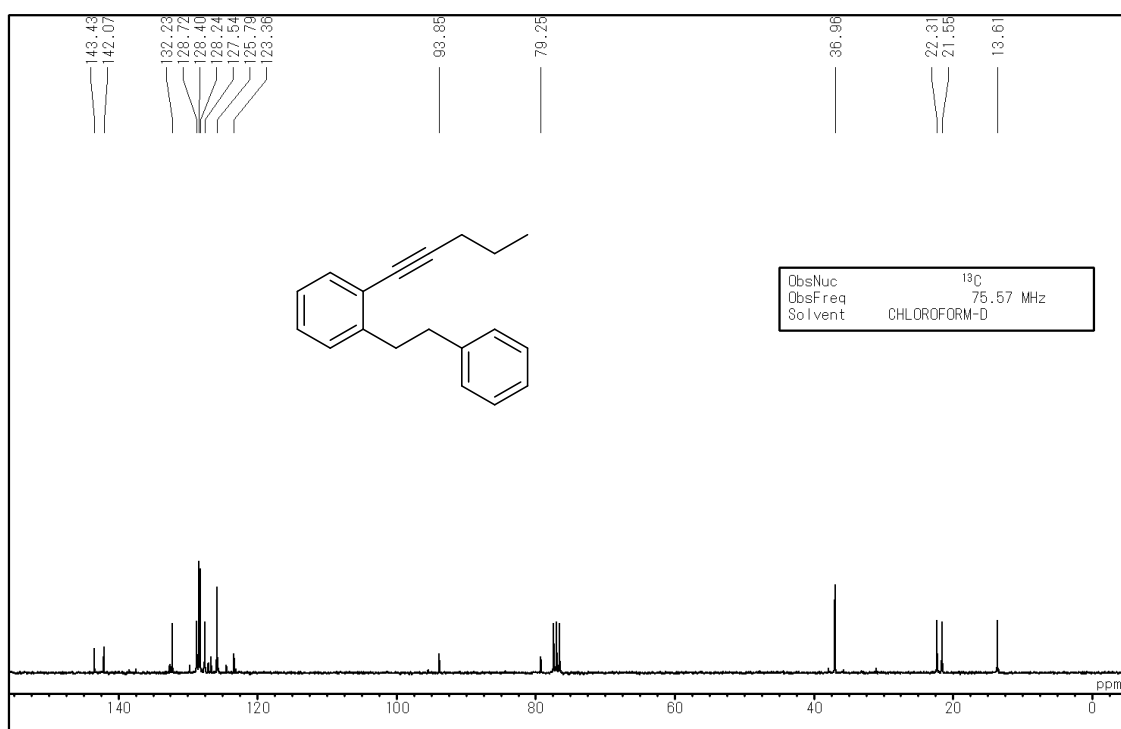

**Trimethyl((2-phenethylphenyl)ethynyl)silane (7e).**

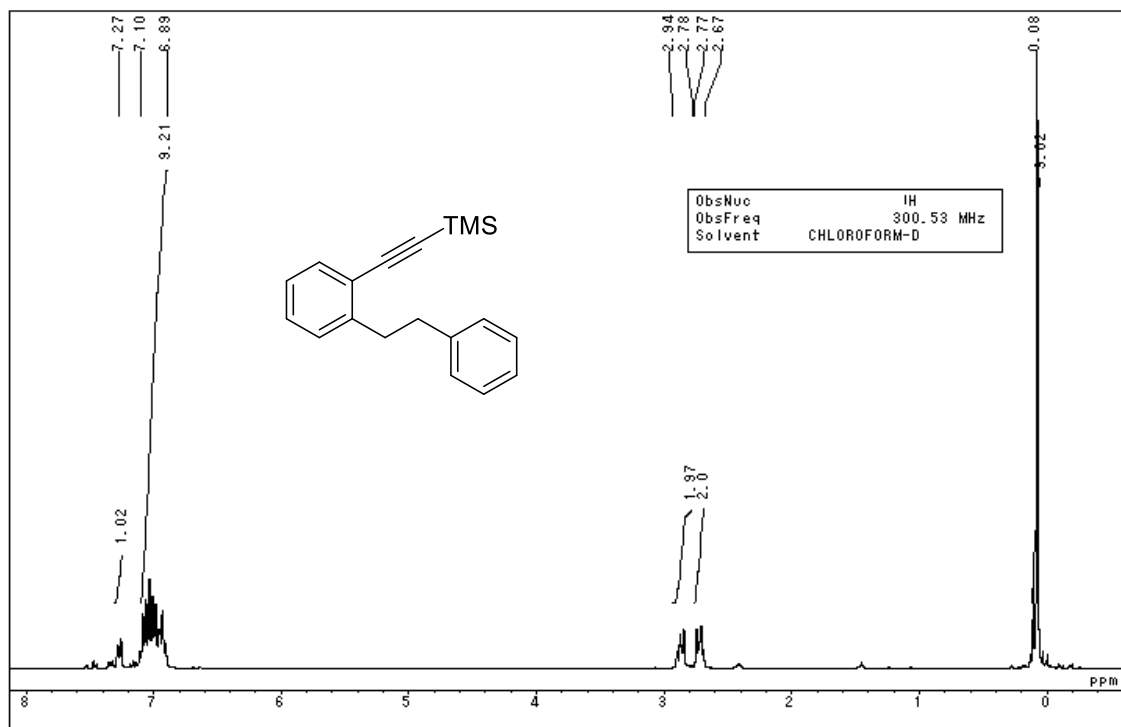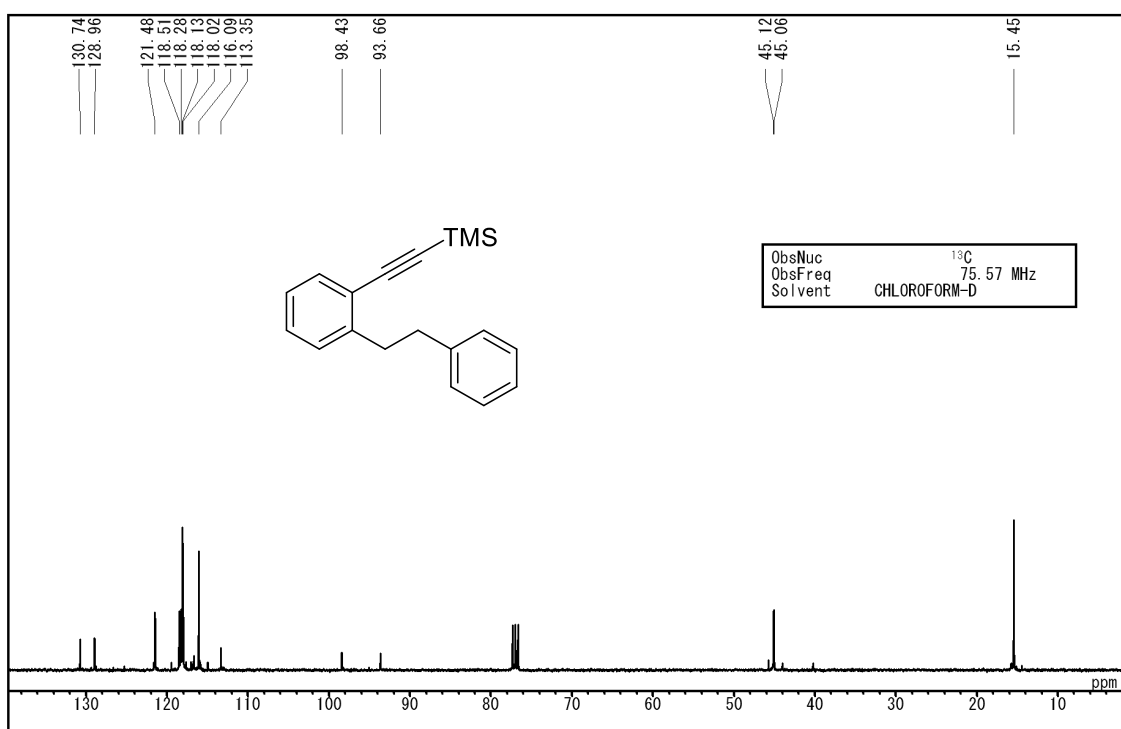

**4-(2-Phenethylphenyl)but-3-yn-1-ol (7f).**

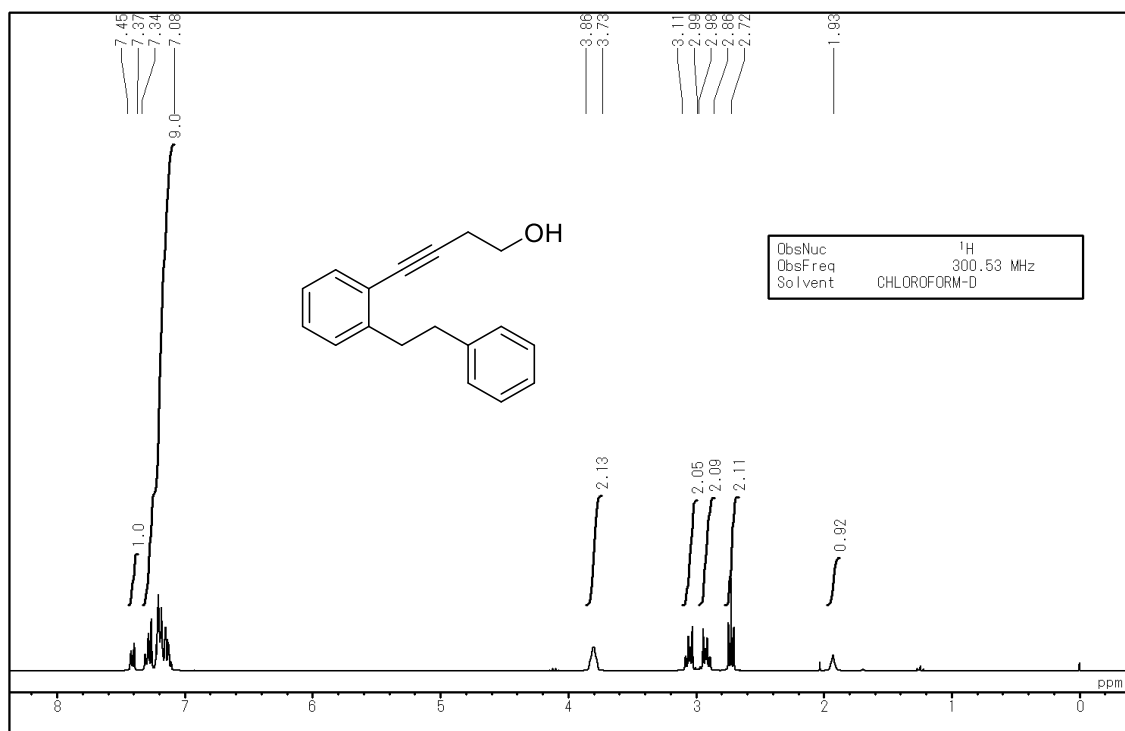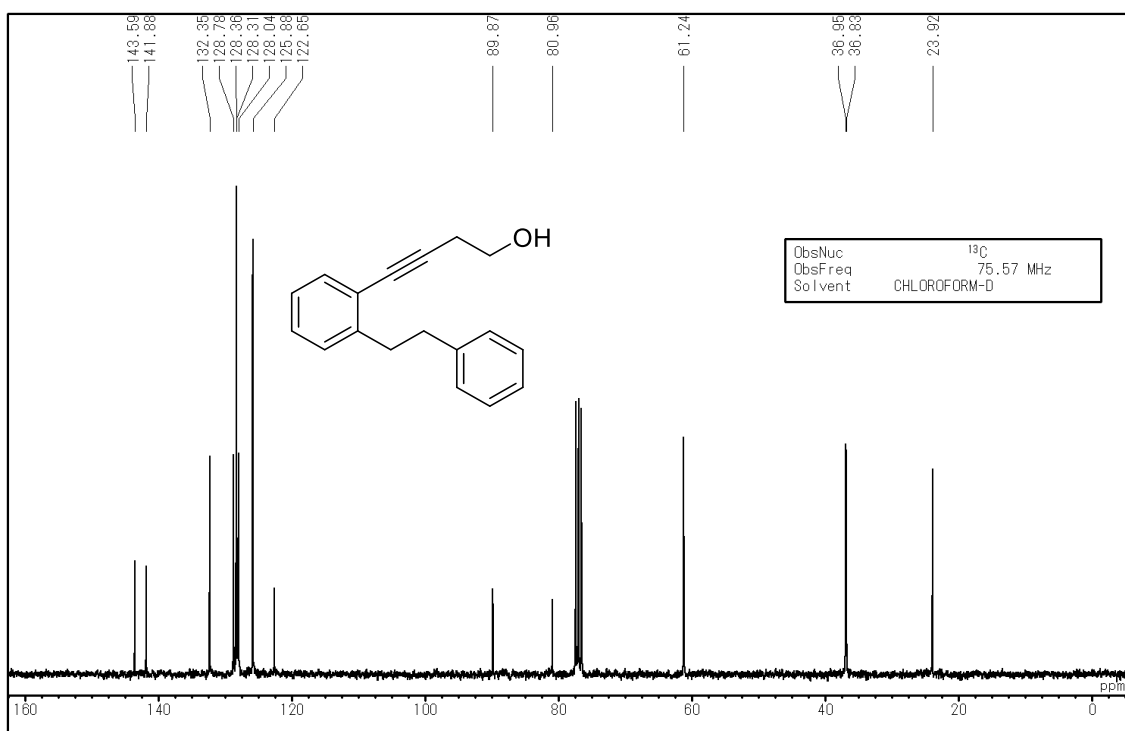

**1-(3,3-Dimethylbut-1-yn-1-yl)-2-(4-methylphenethyl)benzene (7g).**

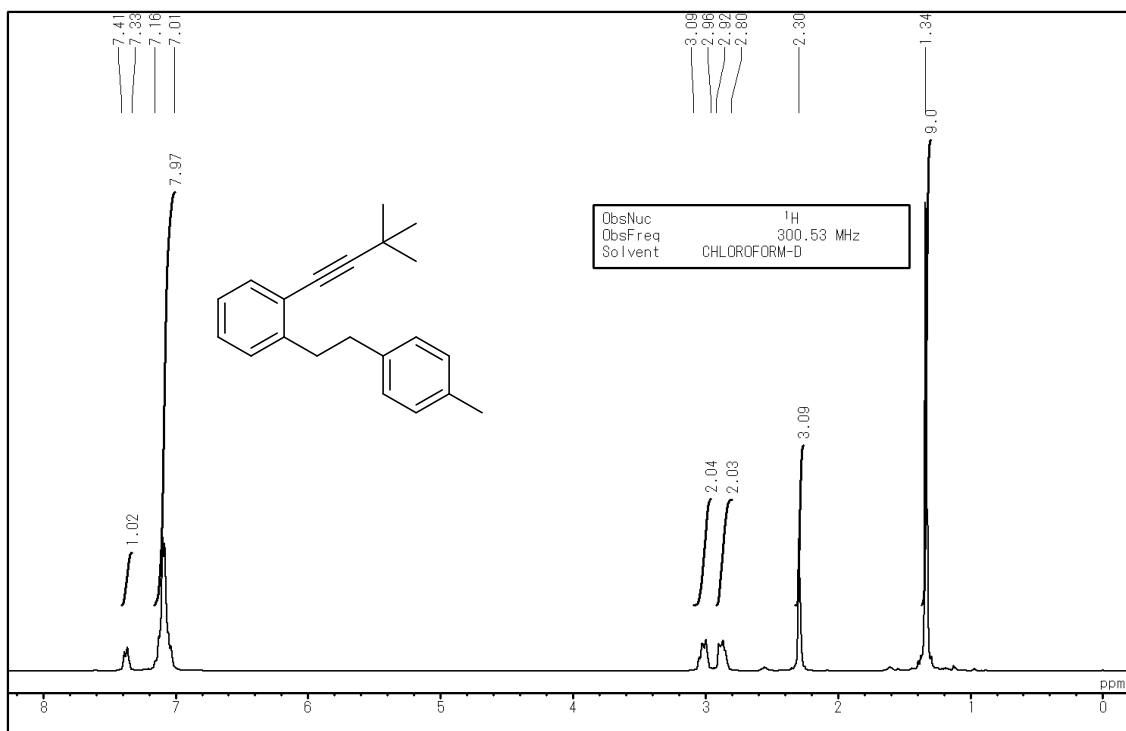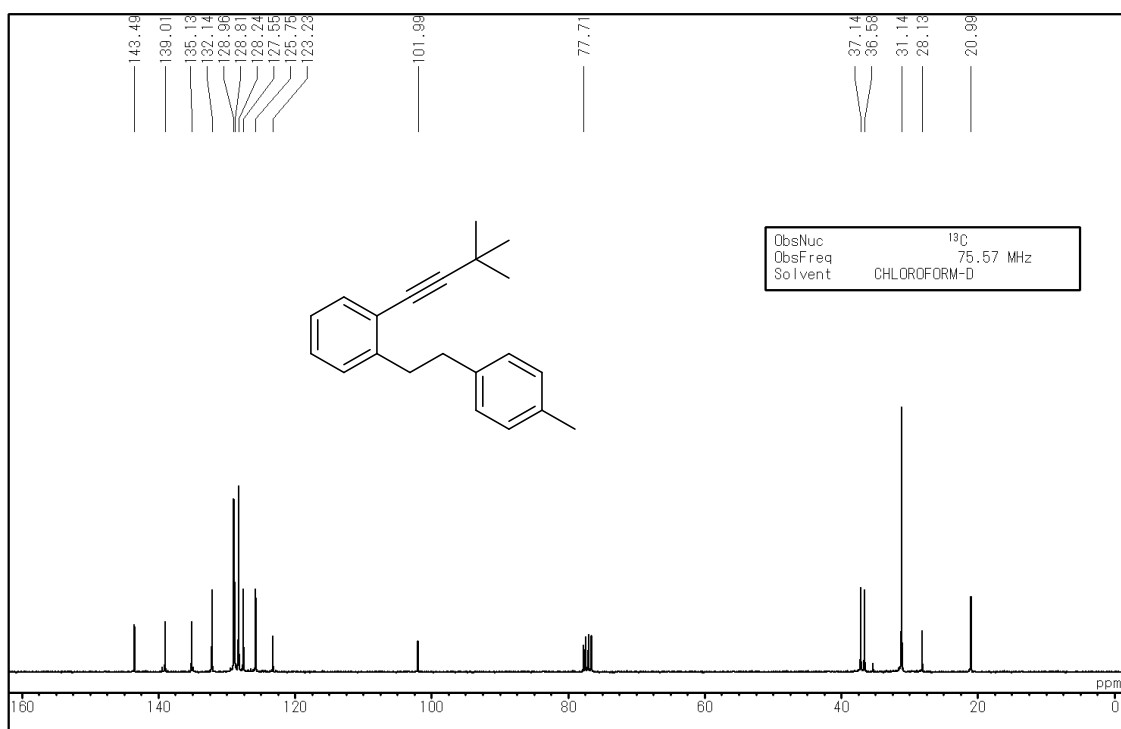

**1-(3,3-Dimethylbut-1-yn-1-yl)-2-(4-(trifluoromethyl)phenethyl)benzene (7h).**

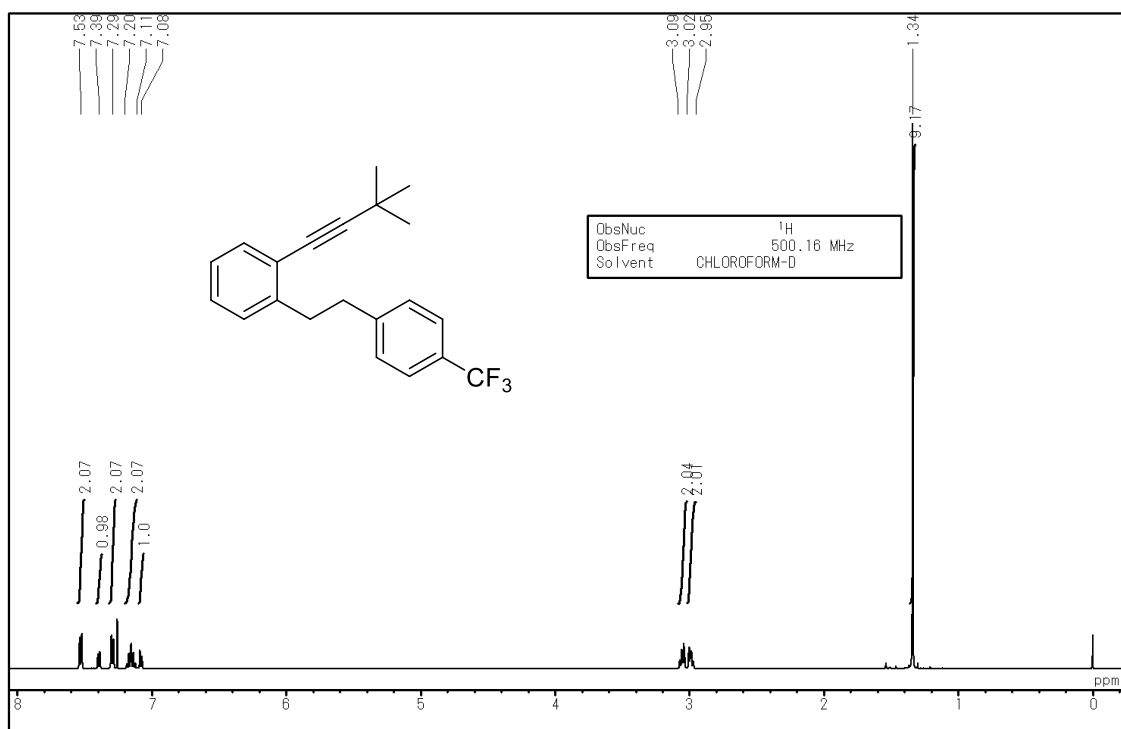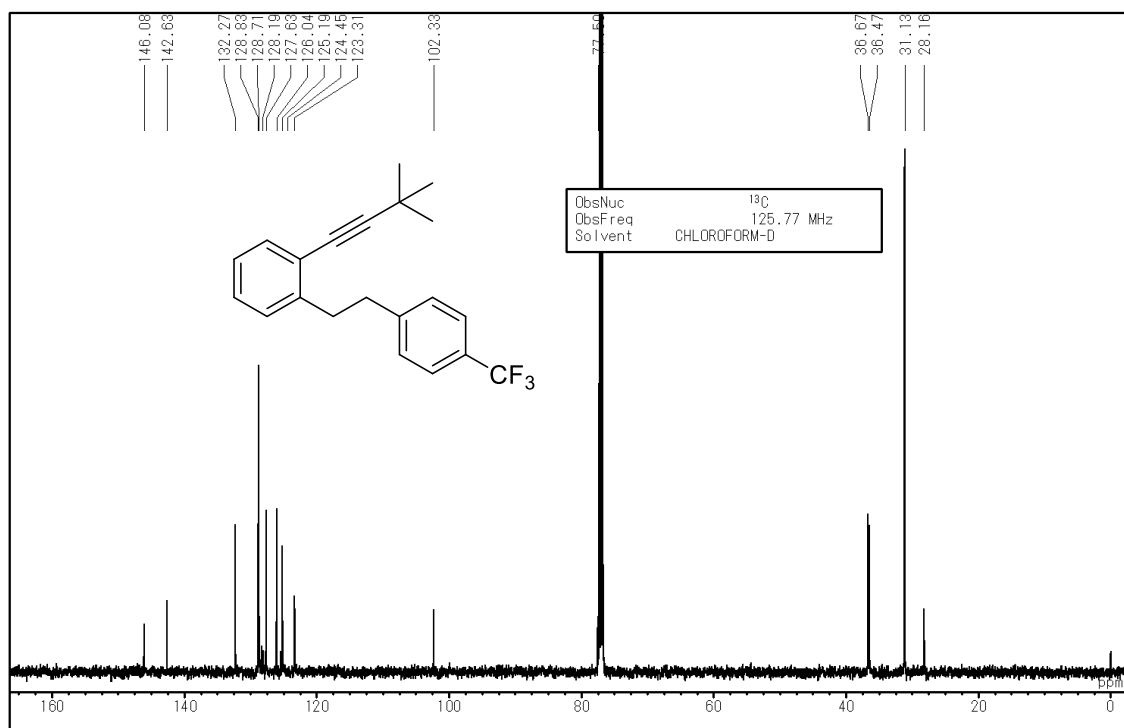

**1-(4-Methylphenethyl)-2-(pent-1-yn-1-yl)benzene (7i).**

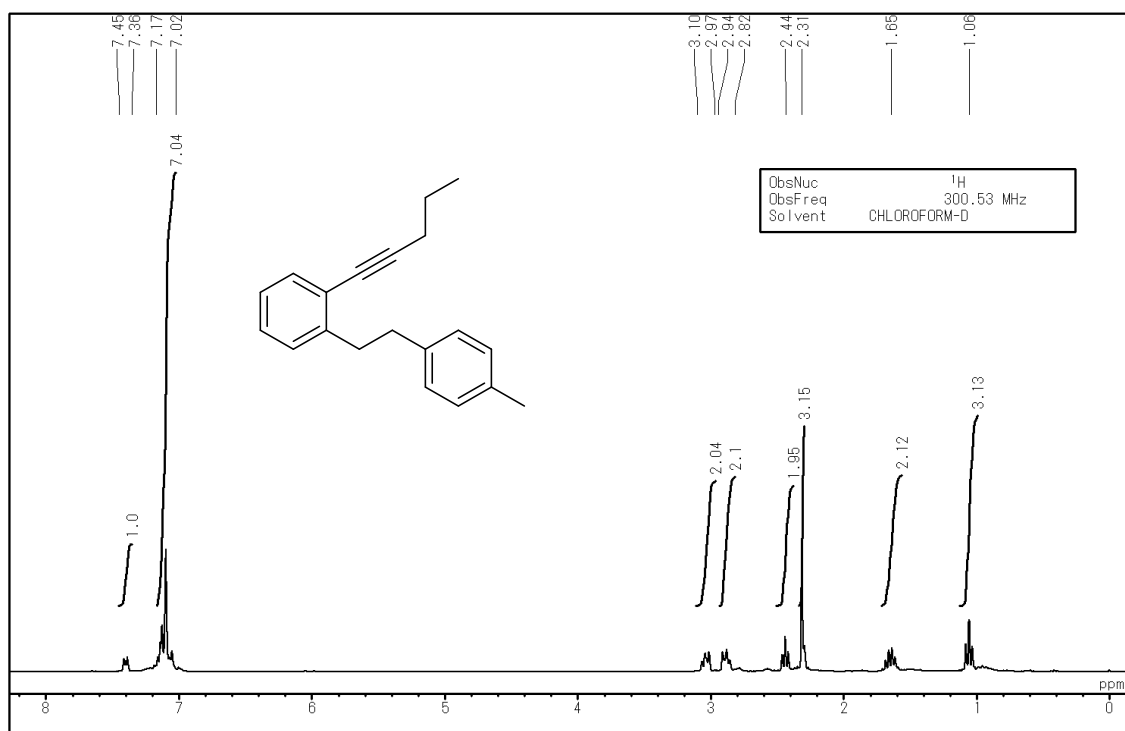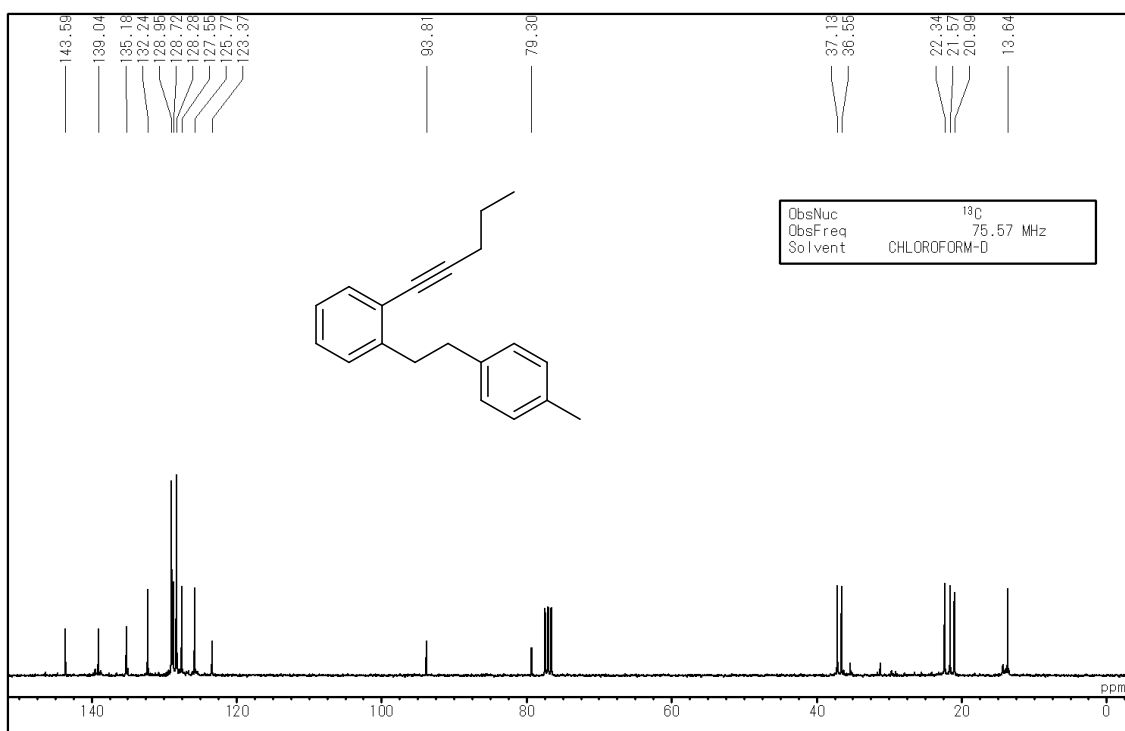

**1-(3,3-Dimethylbut-1-yn-1-yl)-2-(3-phenylpropyl)benzene (8a).**

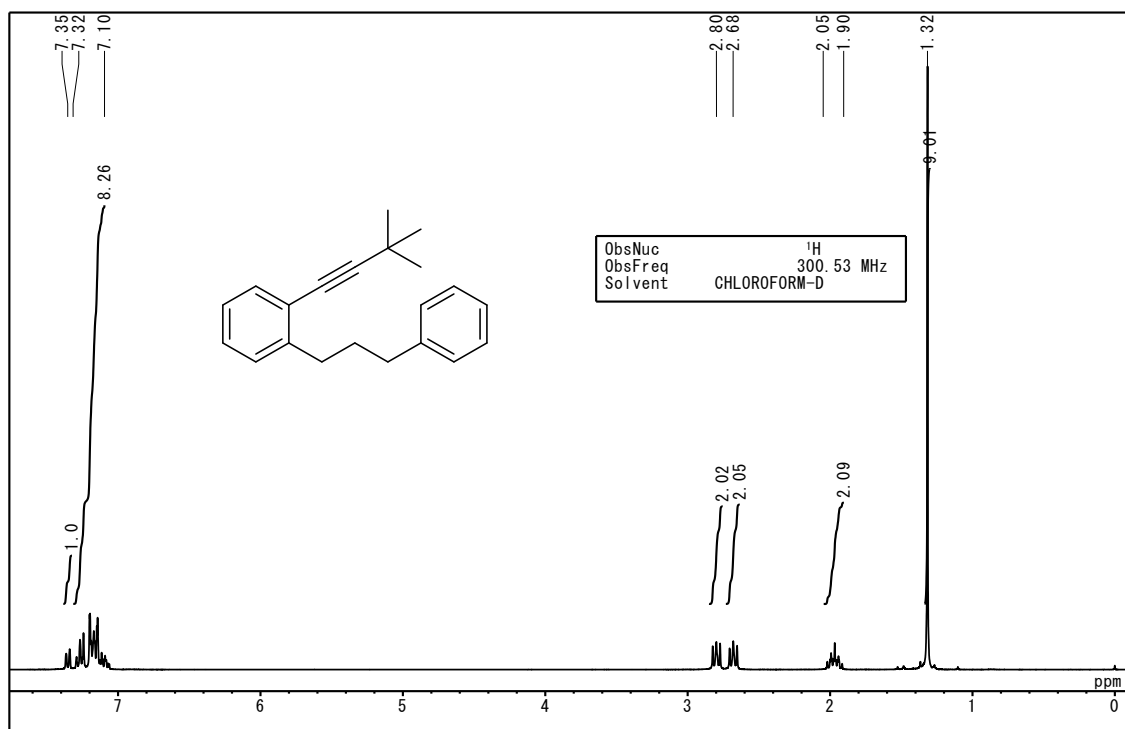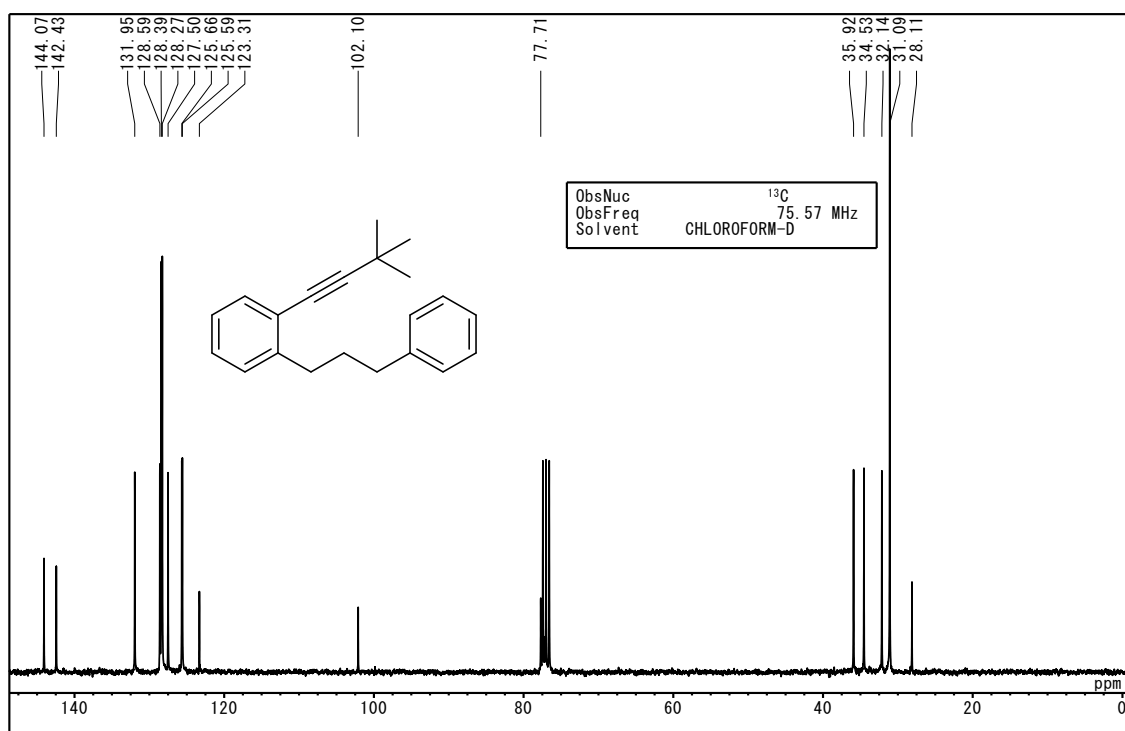



**1-(3-Methylbut-1-yn-1-yl)-2-(3-phenylpropyl)benzene (8b).**

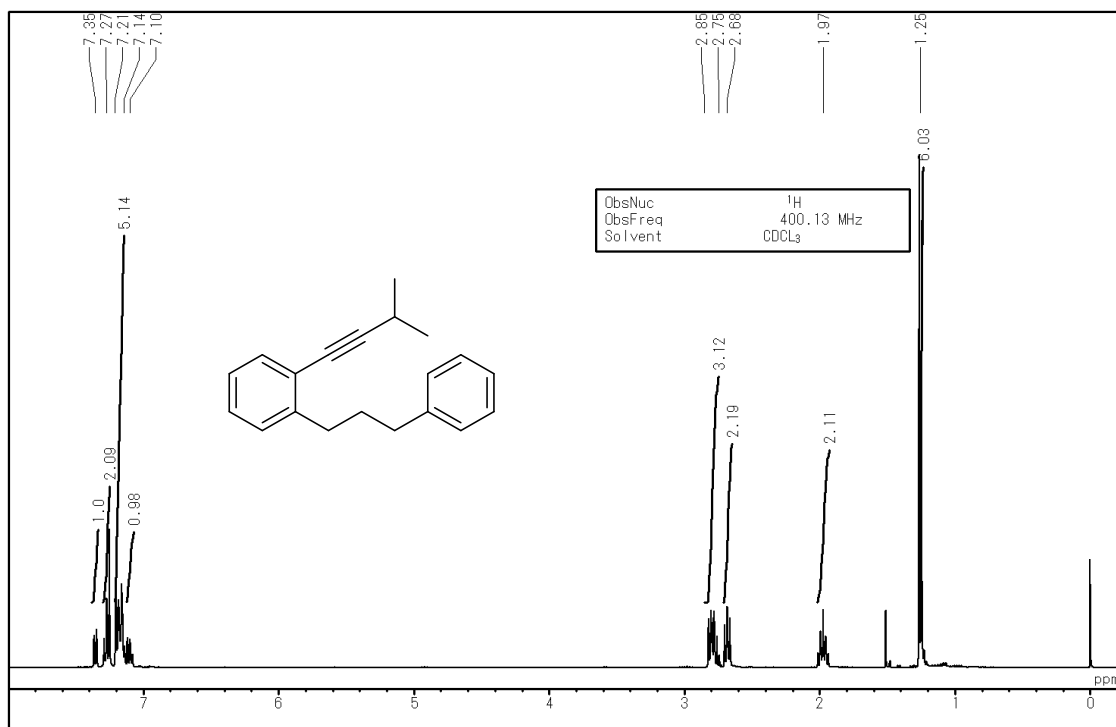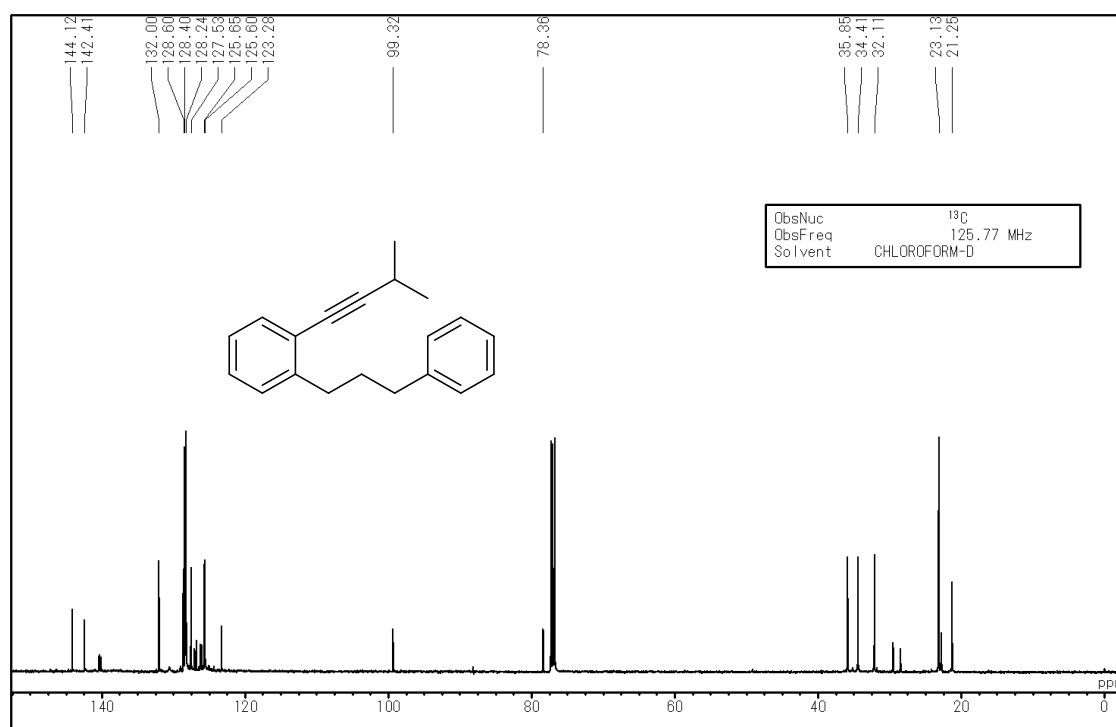

**1-(Pent-1-yn-1-yl)-2-(3-phenylpropyl)benzene (8c).**

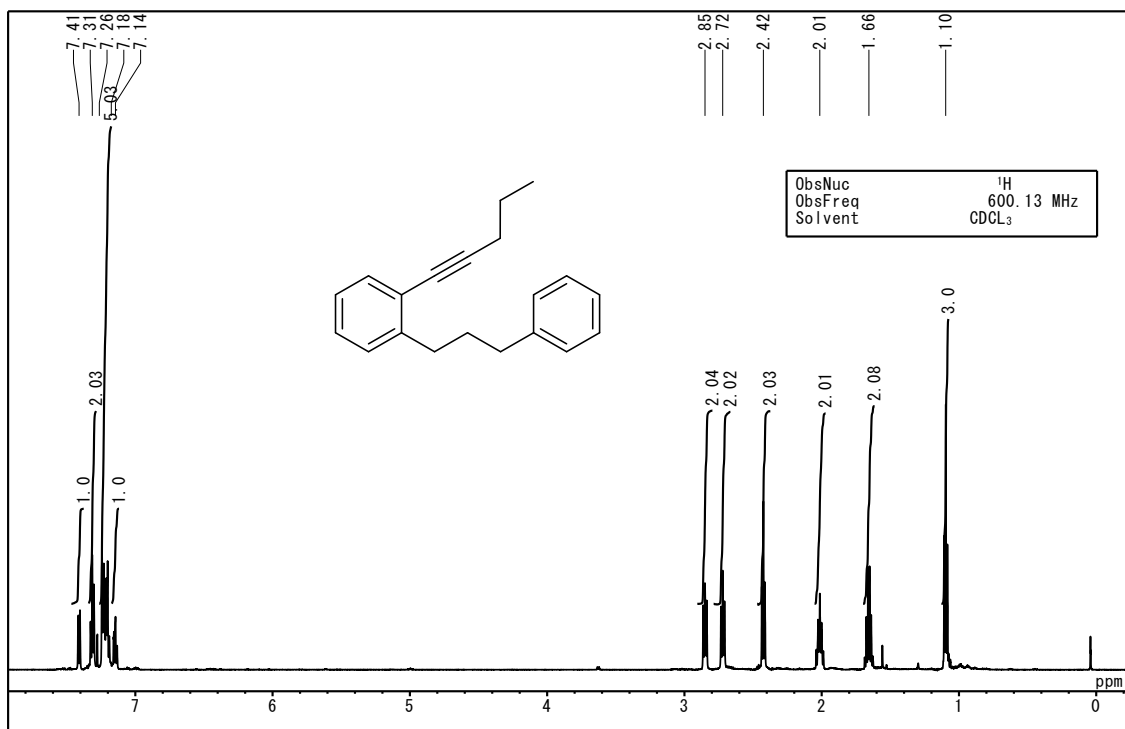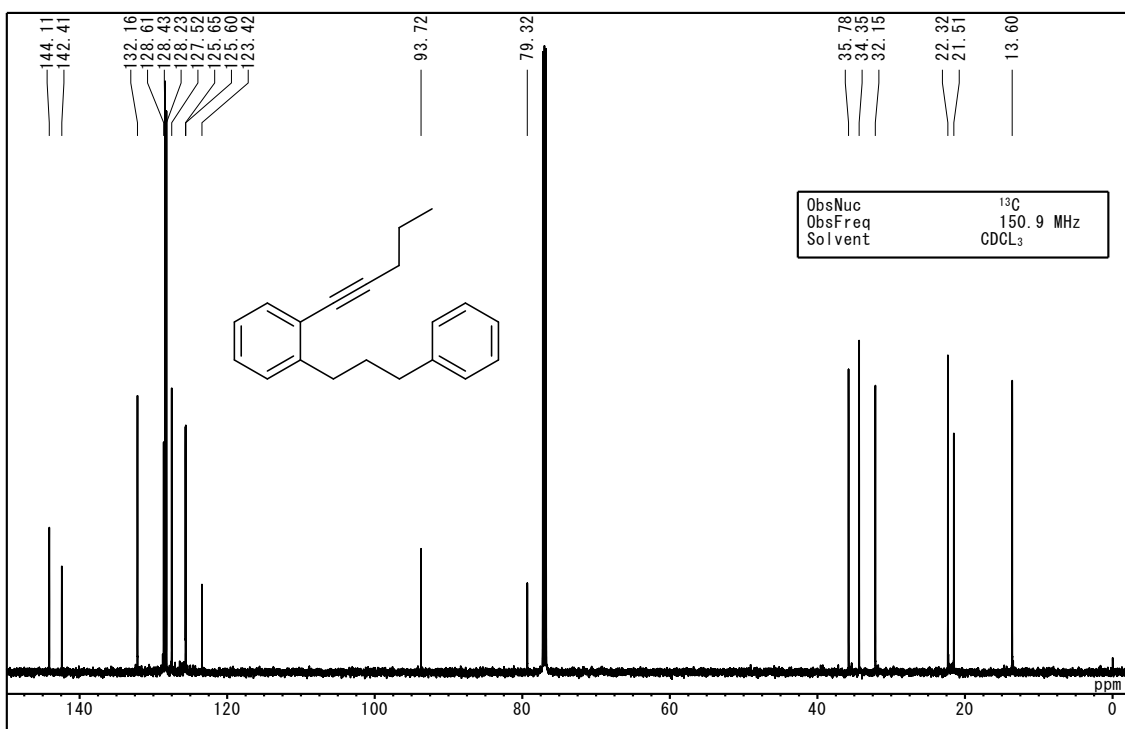

**1-(Phenylethynyl)-2-(3-phenylpropyl)benzene (8d).**

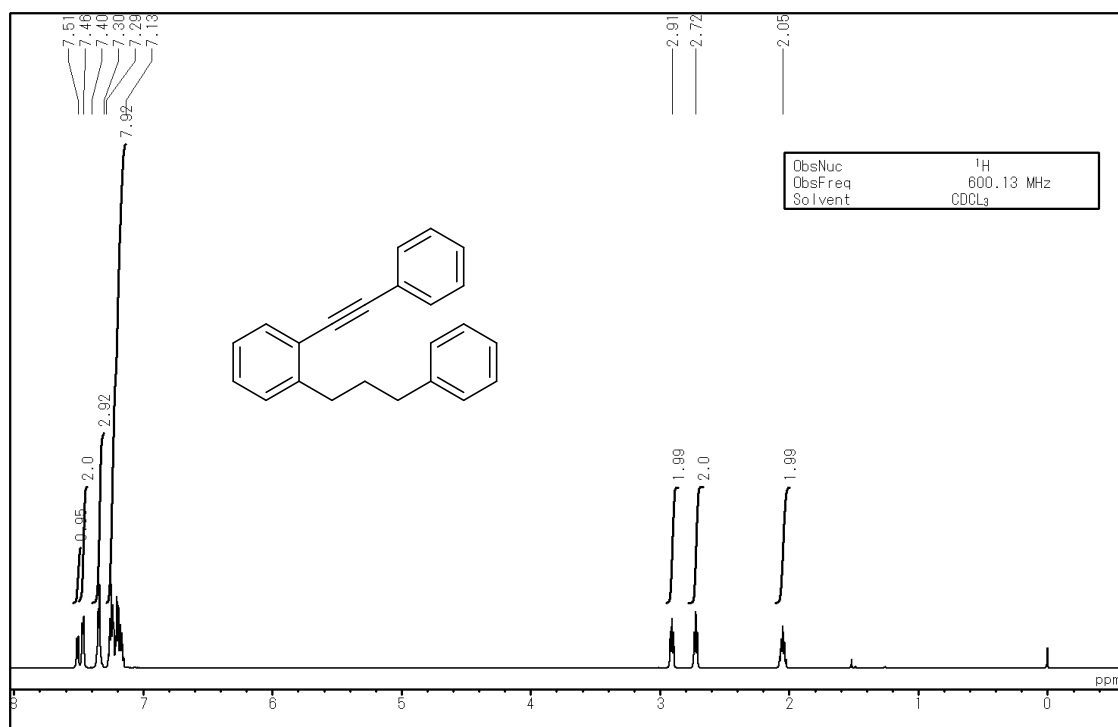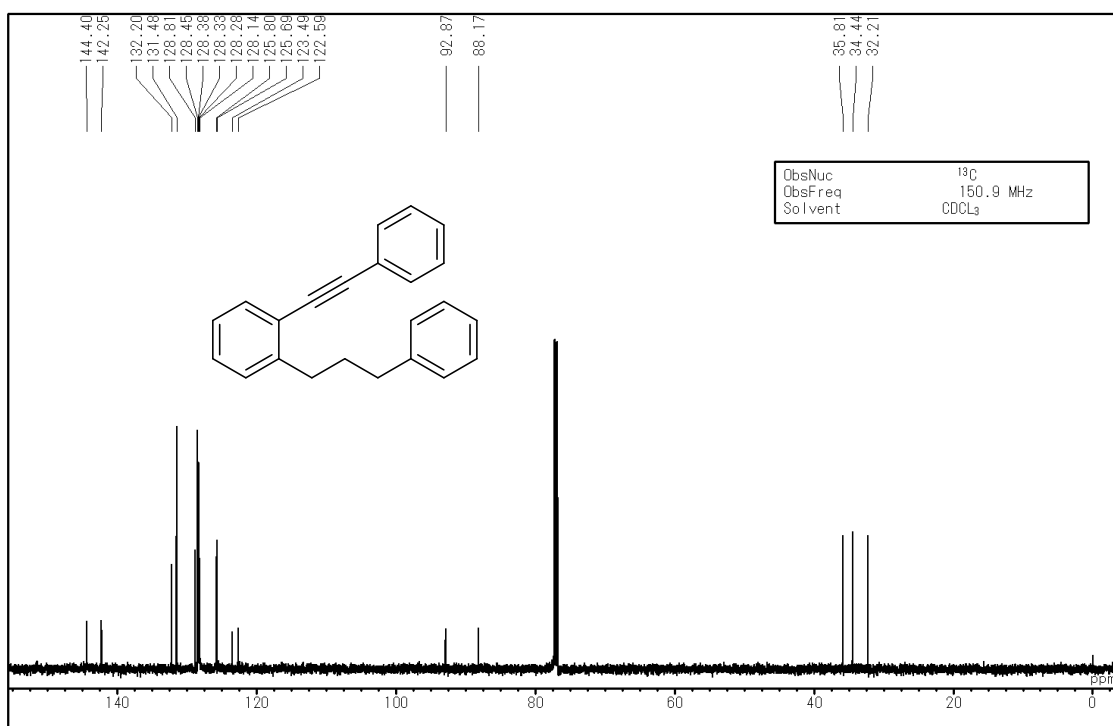

**Trimethyl((2-(3-phenylpropyl)phenyl)ethynyl)silane (8e).**

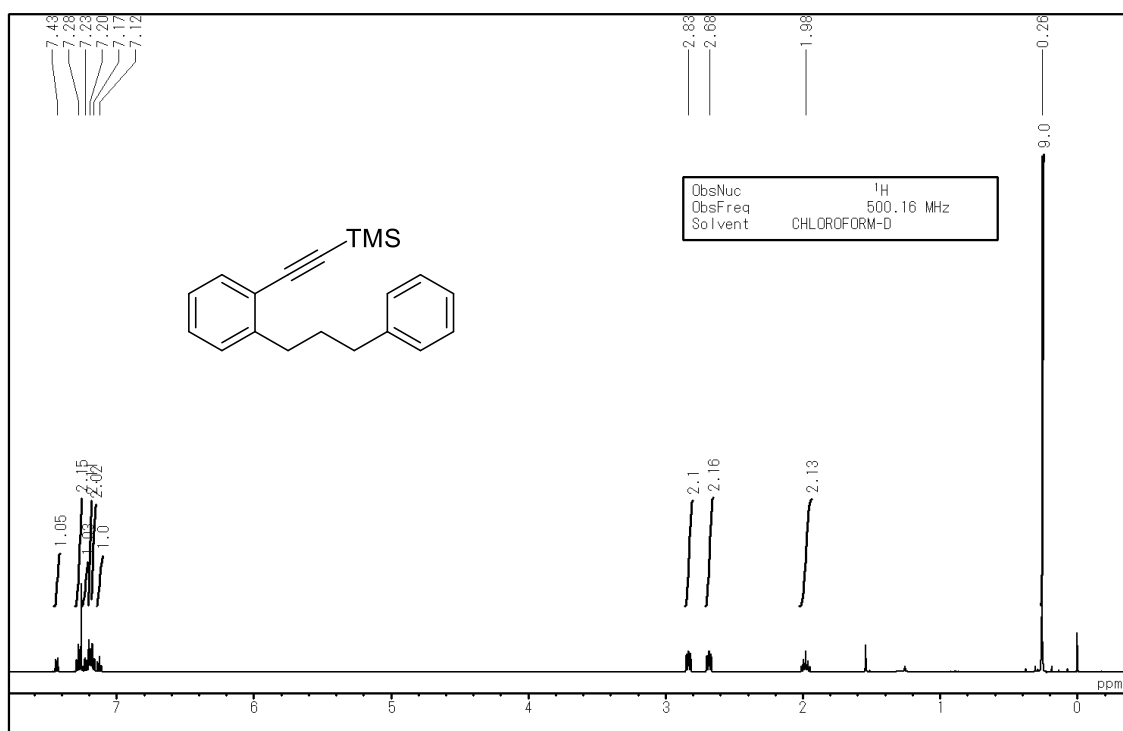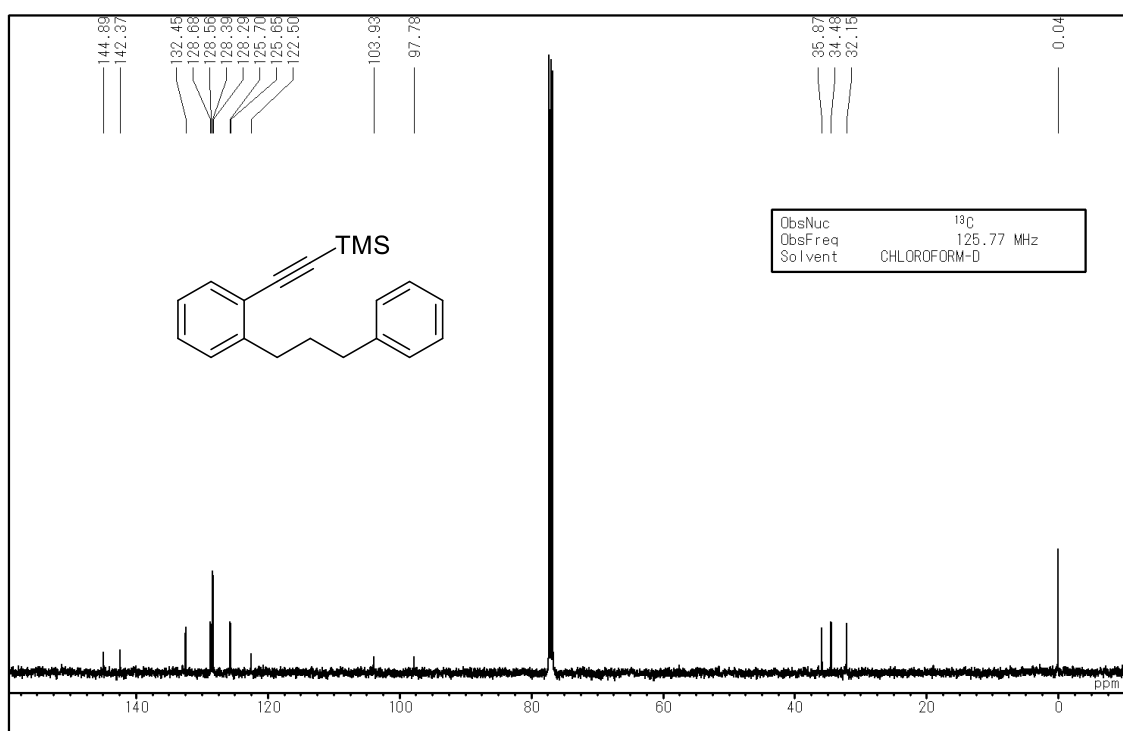

***N,N*-Dimethyl-4-(2-(3-phenylpropyl)phenyl)but-3-yn-1-amine (8f).**

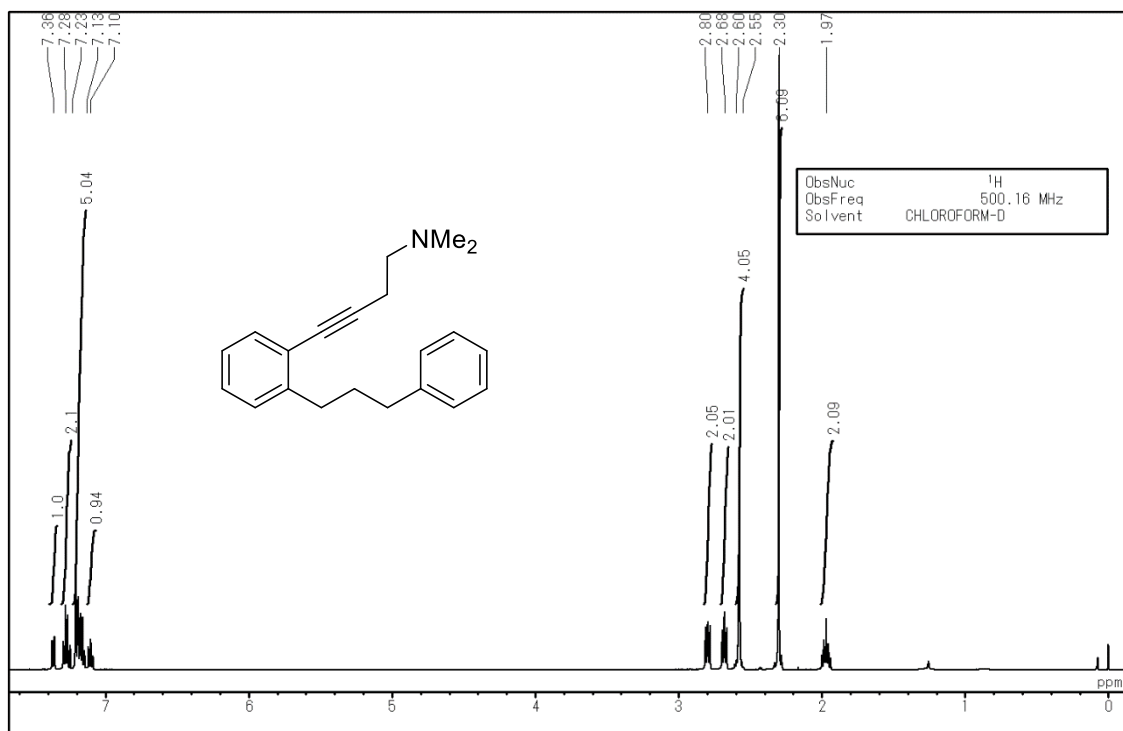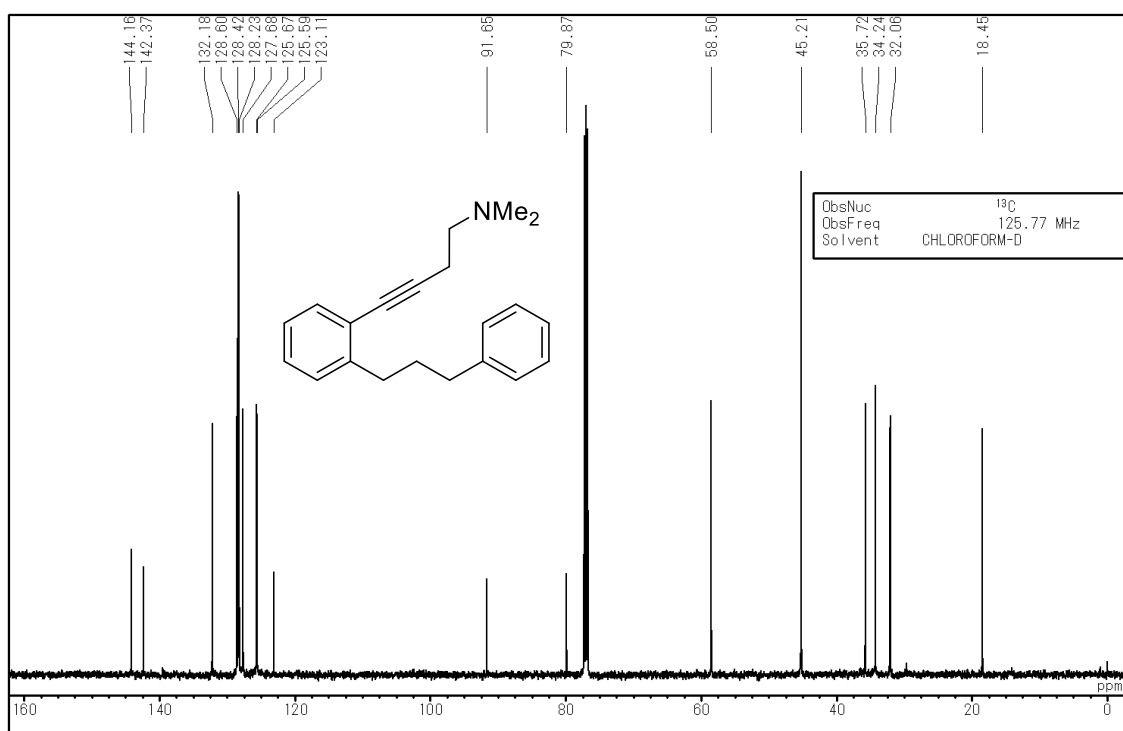

**4-(2-(3-Phenylpropyl)phenyl)but-3-yn-1-ol (8g).**

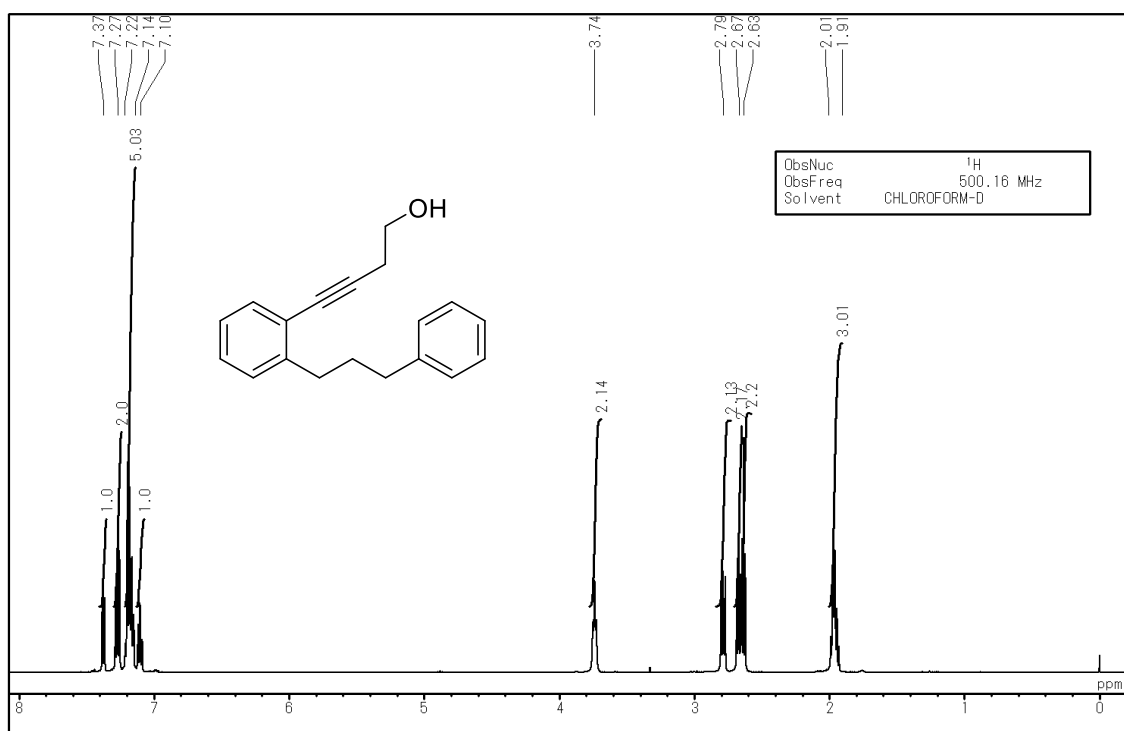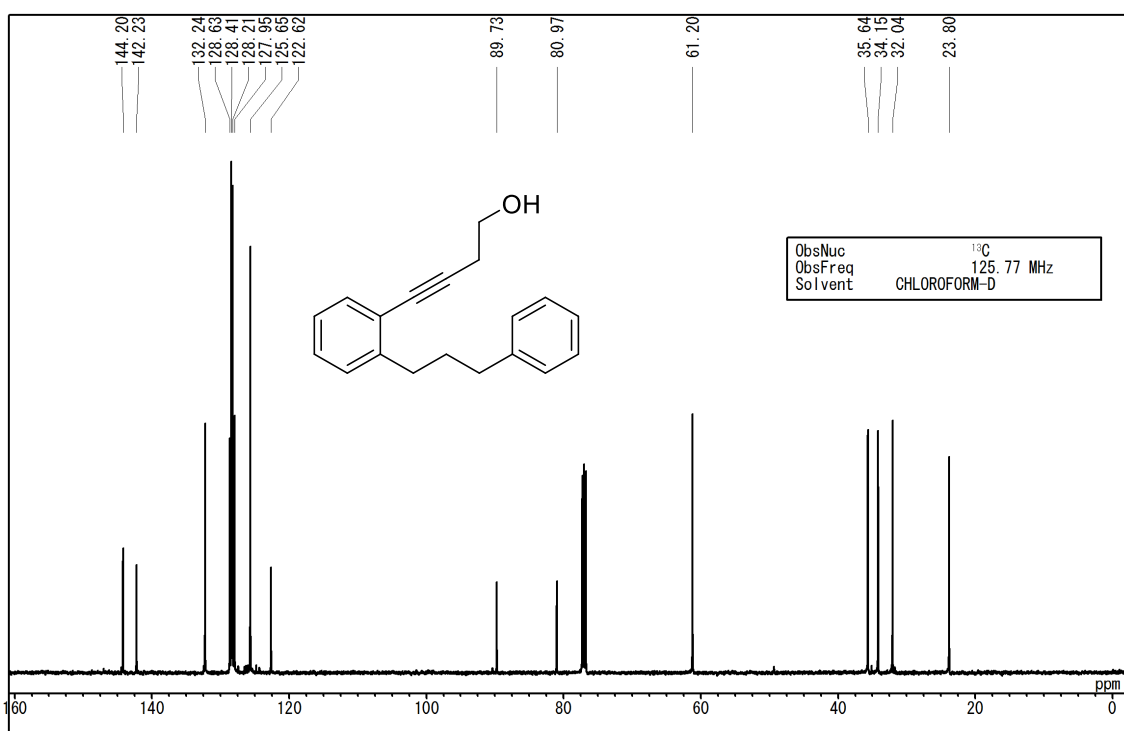

**4-(2-(3-Phenylpropyl)phenyl)but-3-yn-1-amine (8h).**

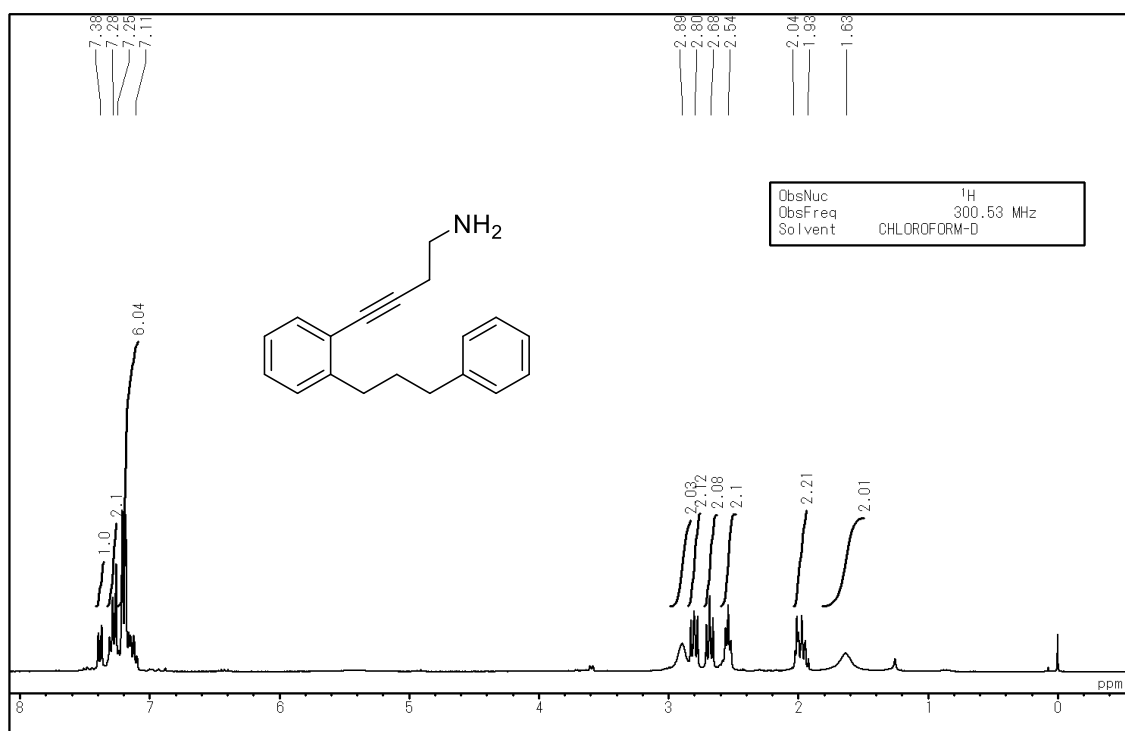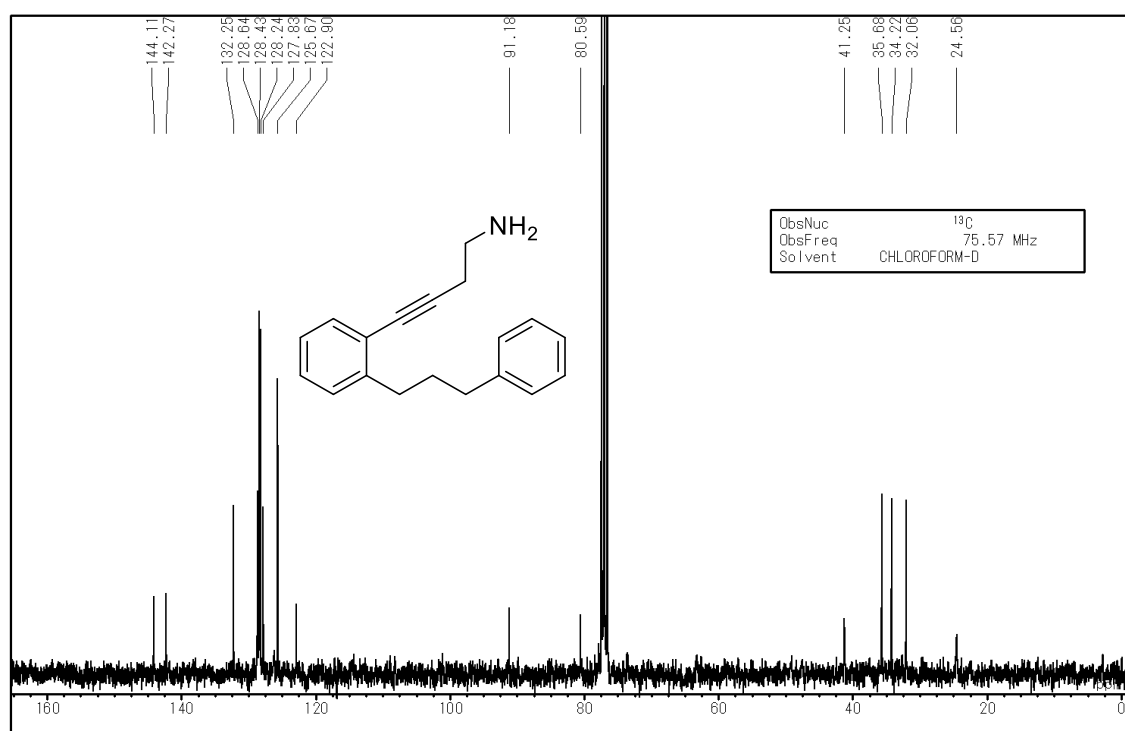

**2-(3,3-Dimethylbut-1-yn-1-yl)-4-methoxy-1-(3-phenylpropyl)benzene (8i).**

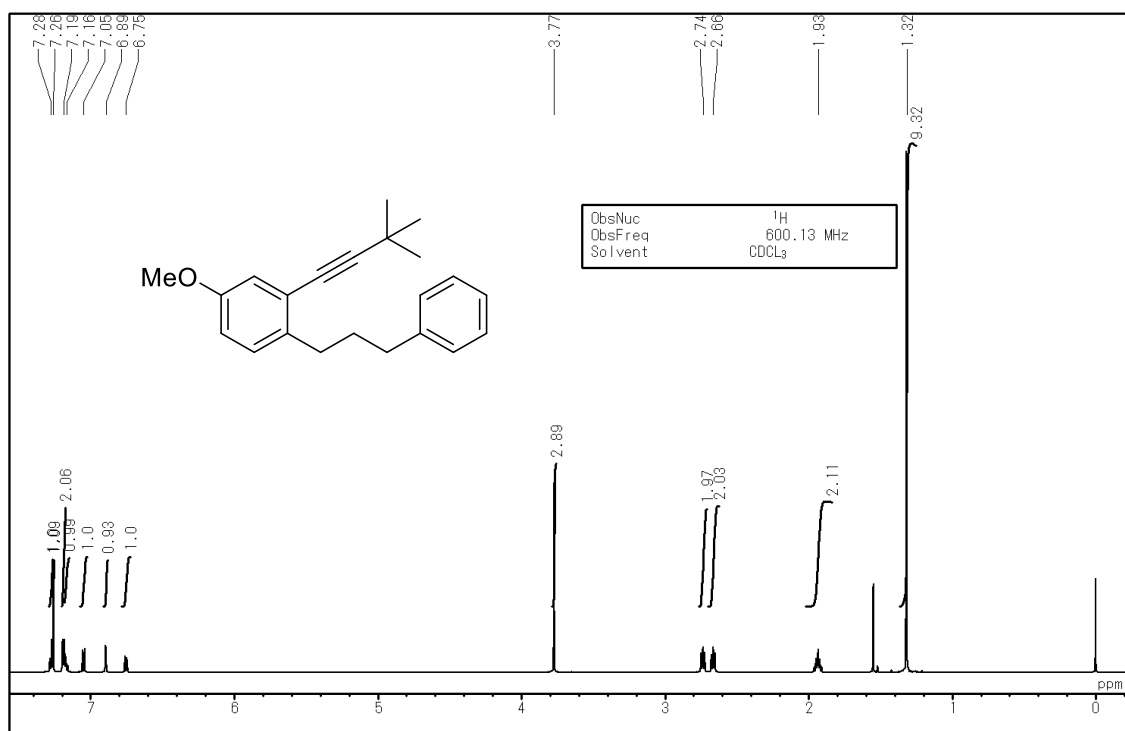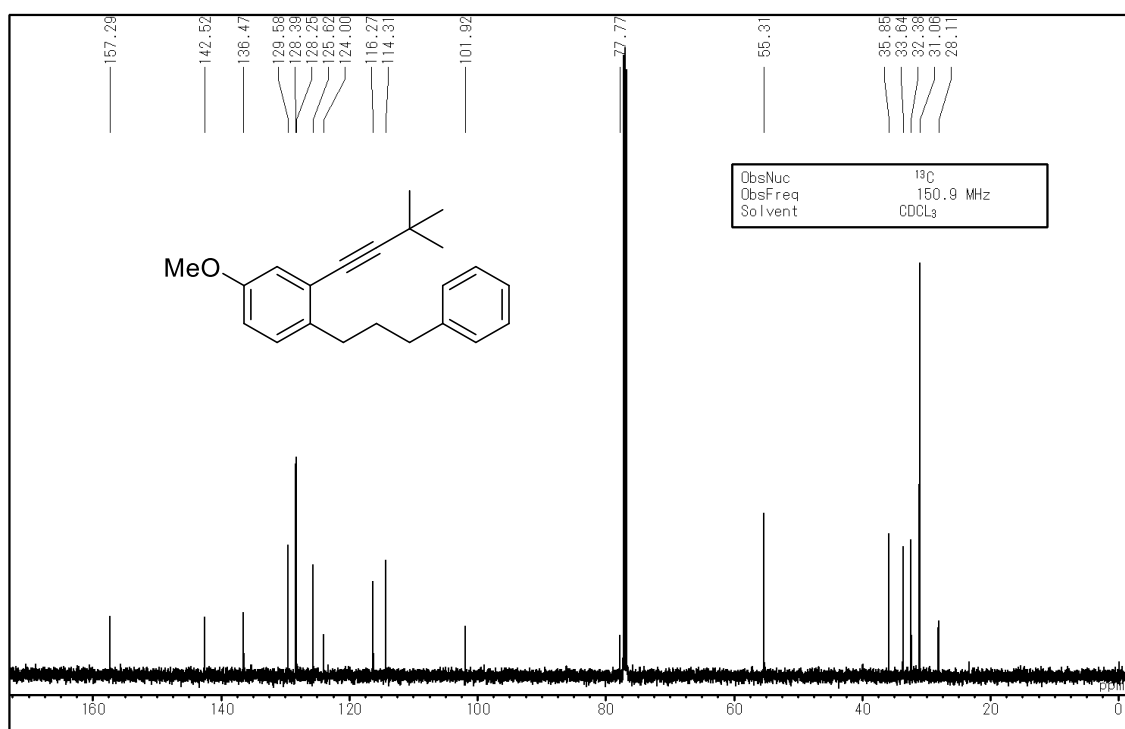



**1-(3,3-Dimethylbut-1-yn-1-yl)-2-(3-(4-methoxyphenyl)propyl)benzene (8j).**

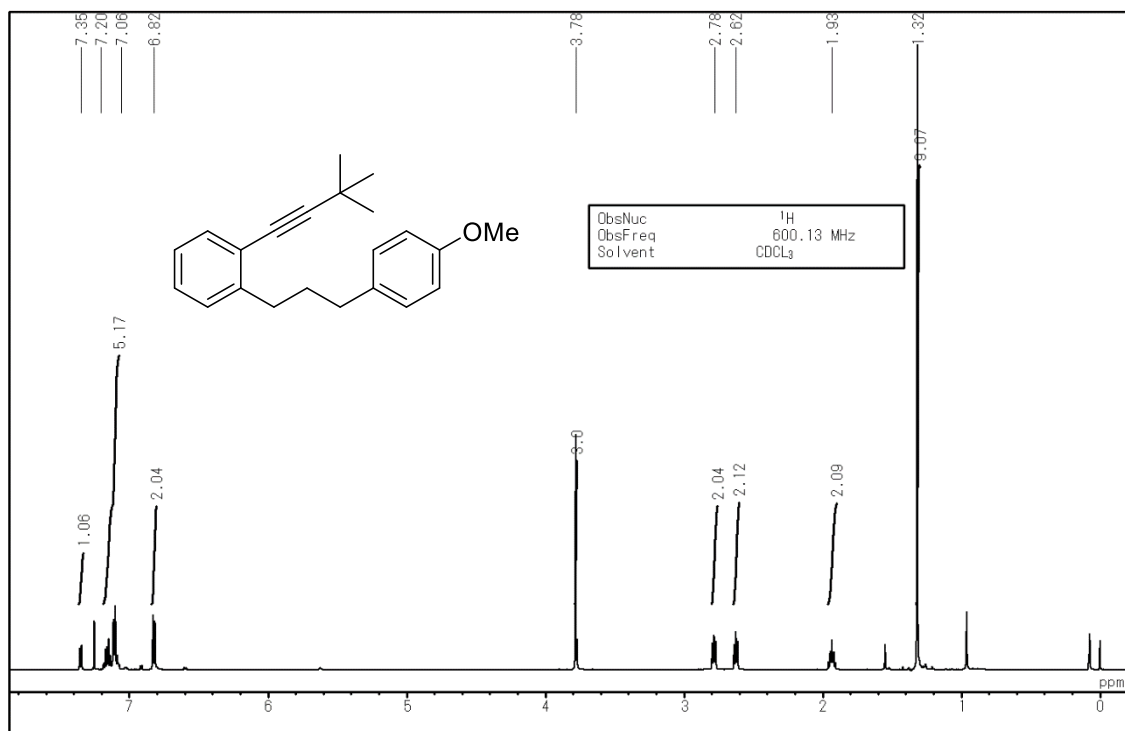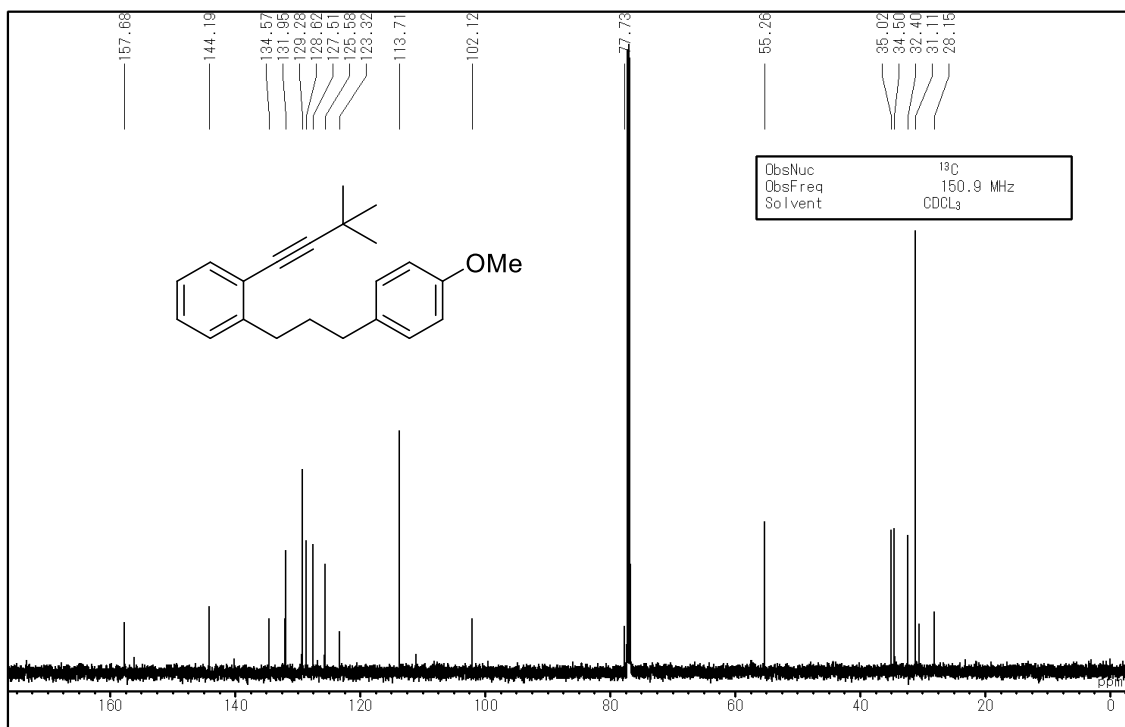

**2-(3,3-Dimethylbut-1-yn-1-yl)-4-methyl-1-(3-phenylpropyl)benzene (8k).**

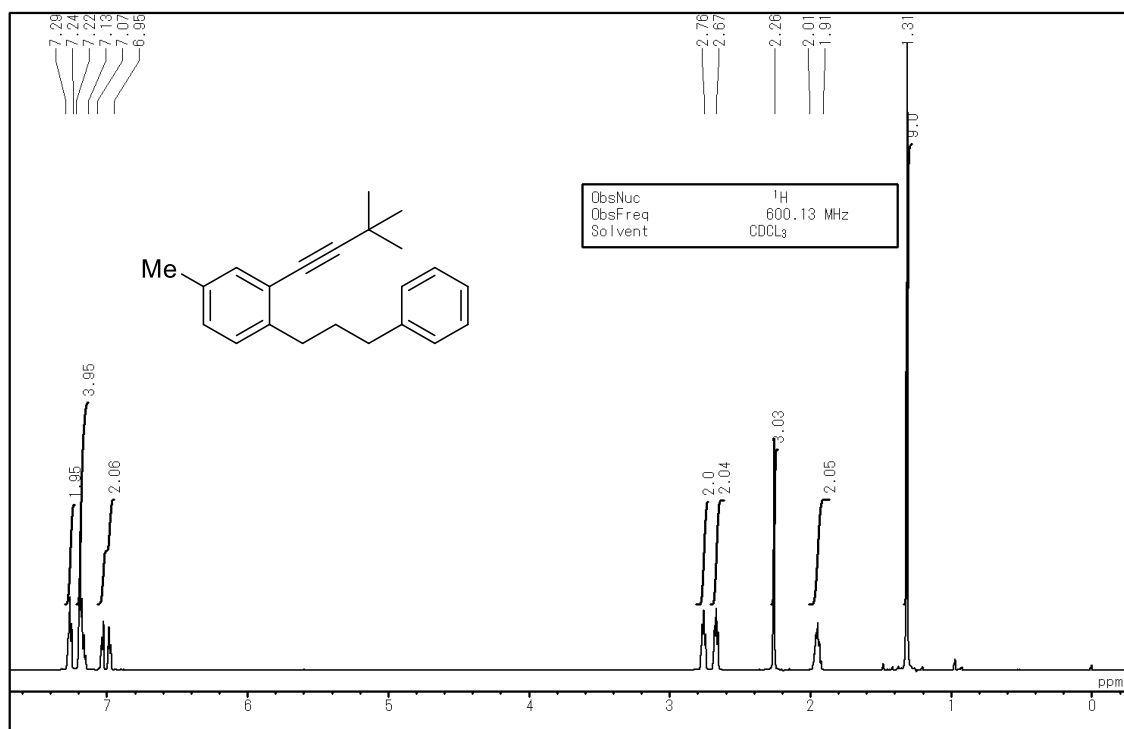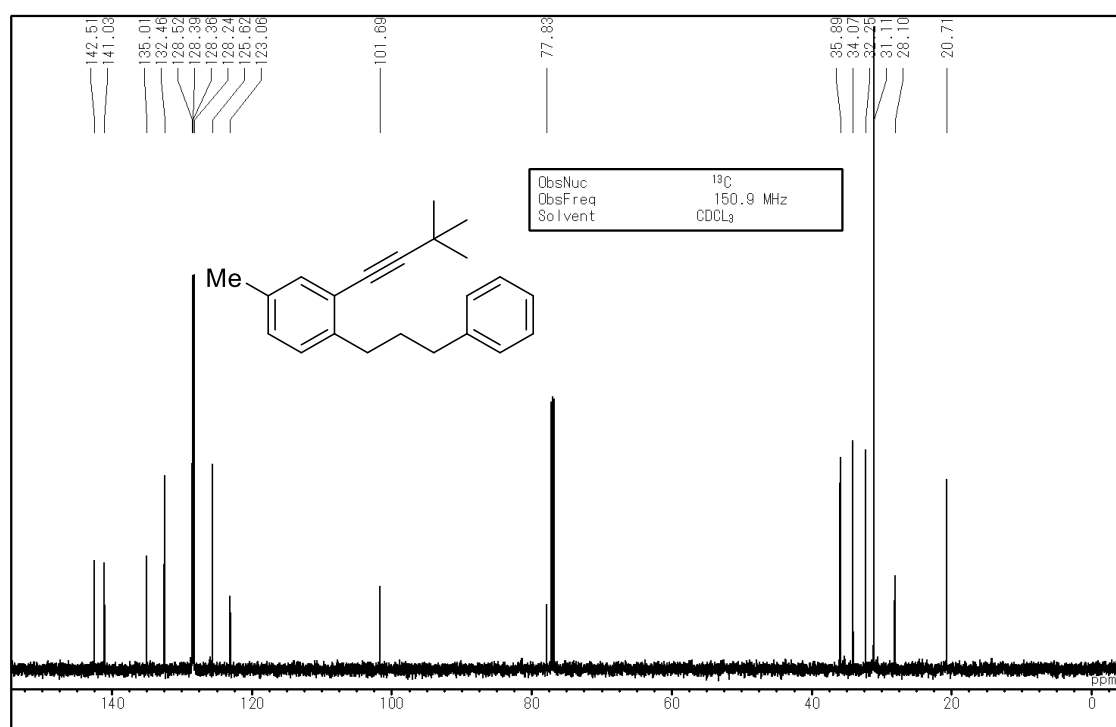

**1-(3,3-Dimethylbut-1-yn-1-yl)-2-(3-(*p*-tolyl)propyl)benzene (8l).**

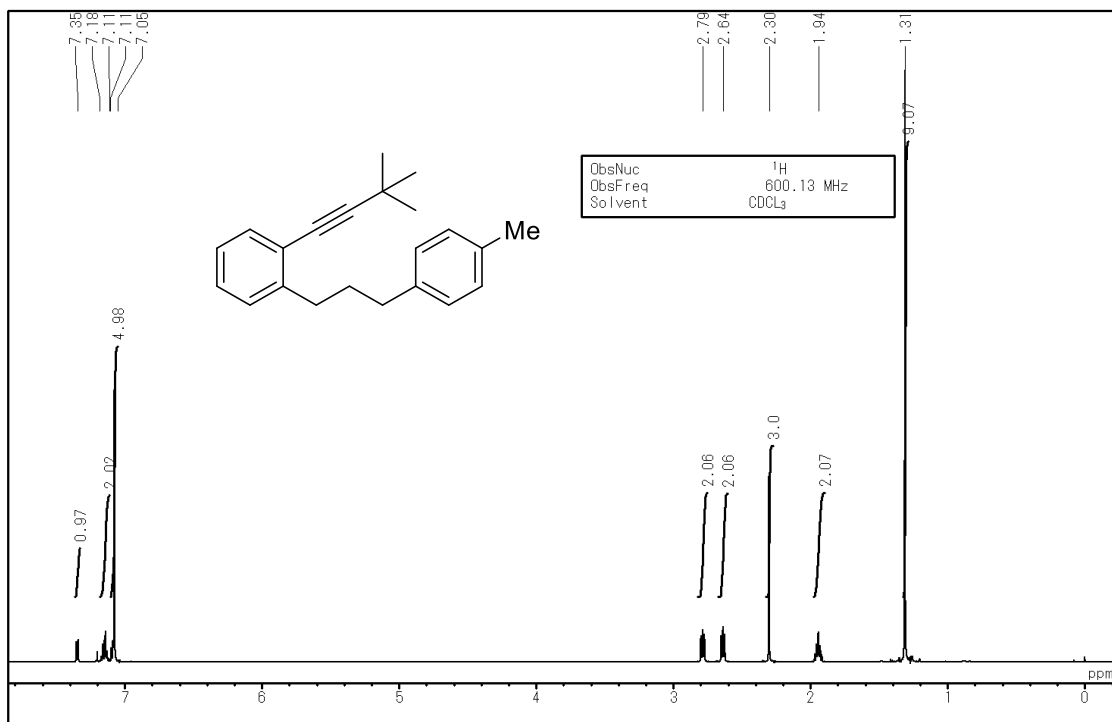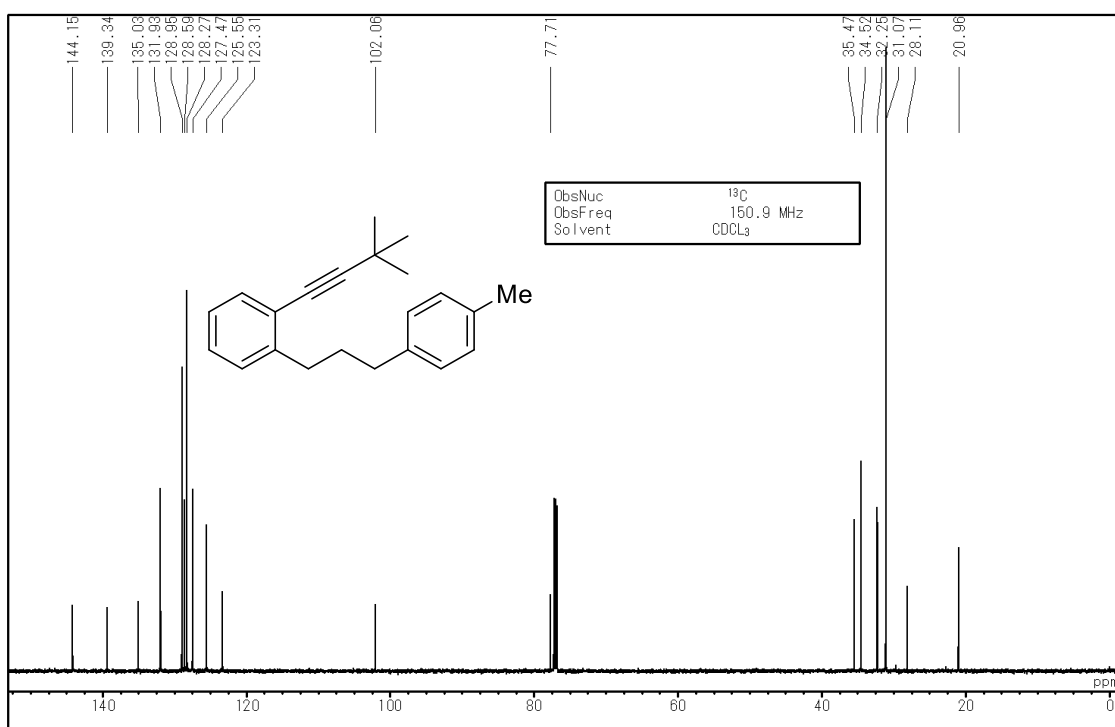

**1-(3,3-Dimethylbut-1-yn-1-yl)-2-(4-phenylbutyl)benzene (9a).**

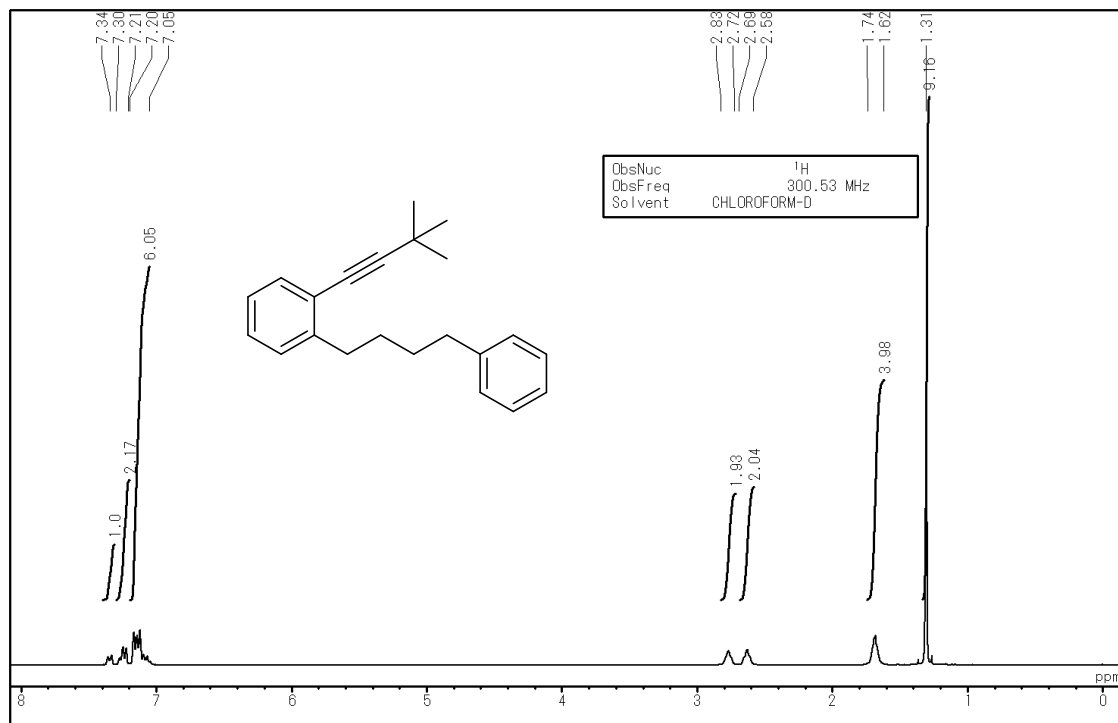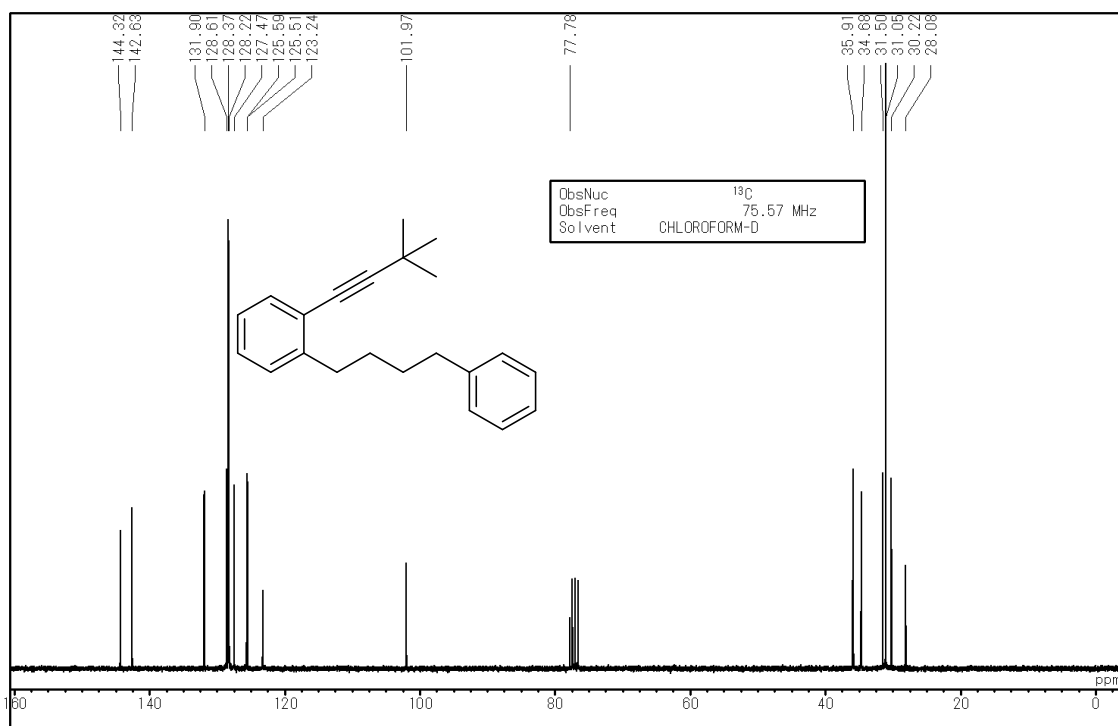

**1-(Pent-1-yn-1-yl)-2-(4-phenylbutyl)benzene (9b).**

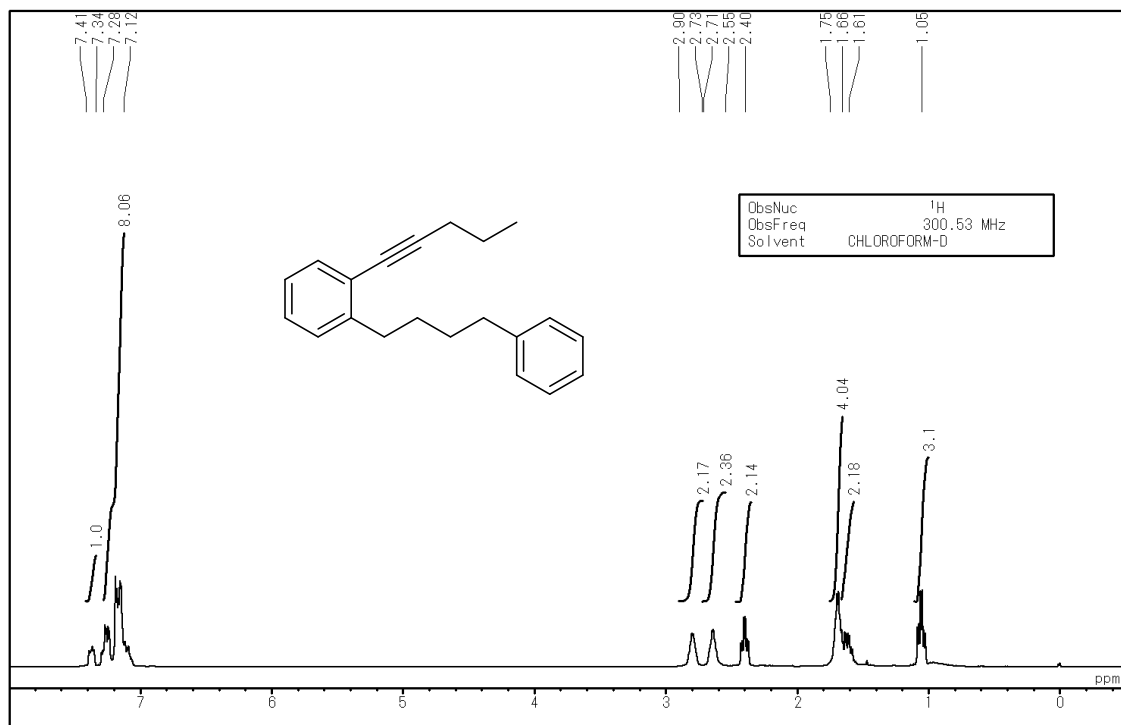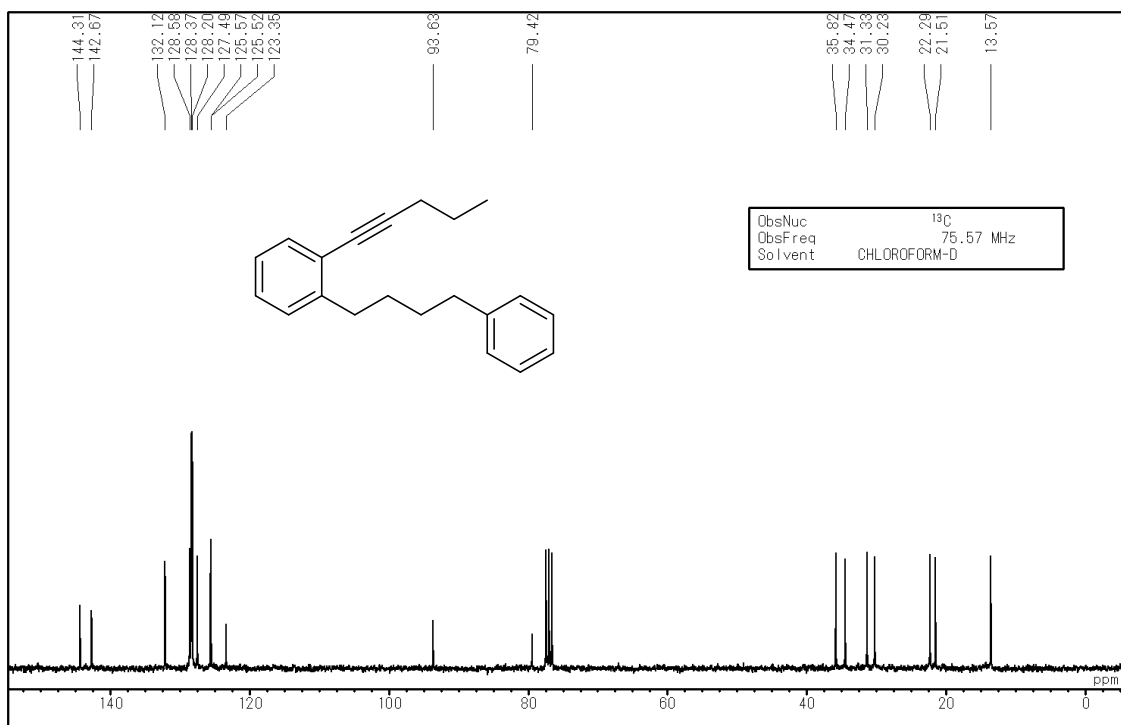

**1-(Hept-1-yn-1-yl)-2-(4-phenylbutyl)benzene (9c).**

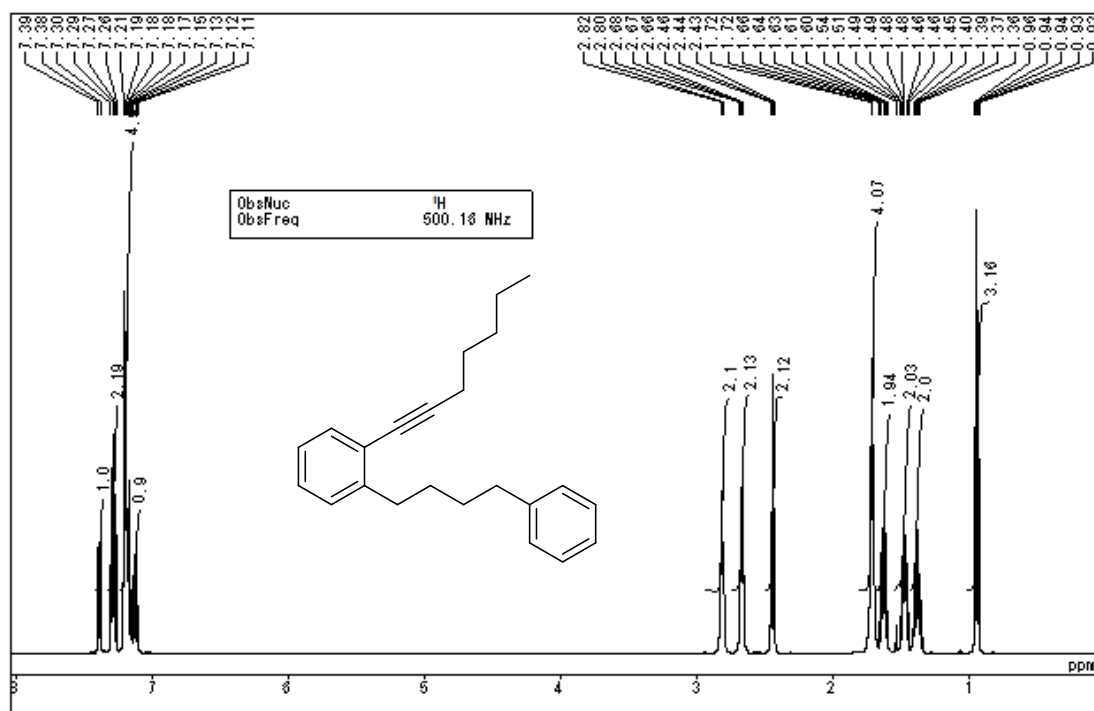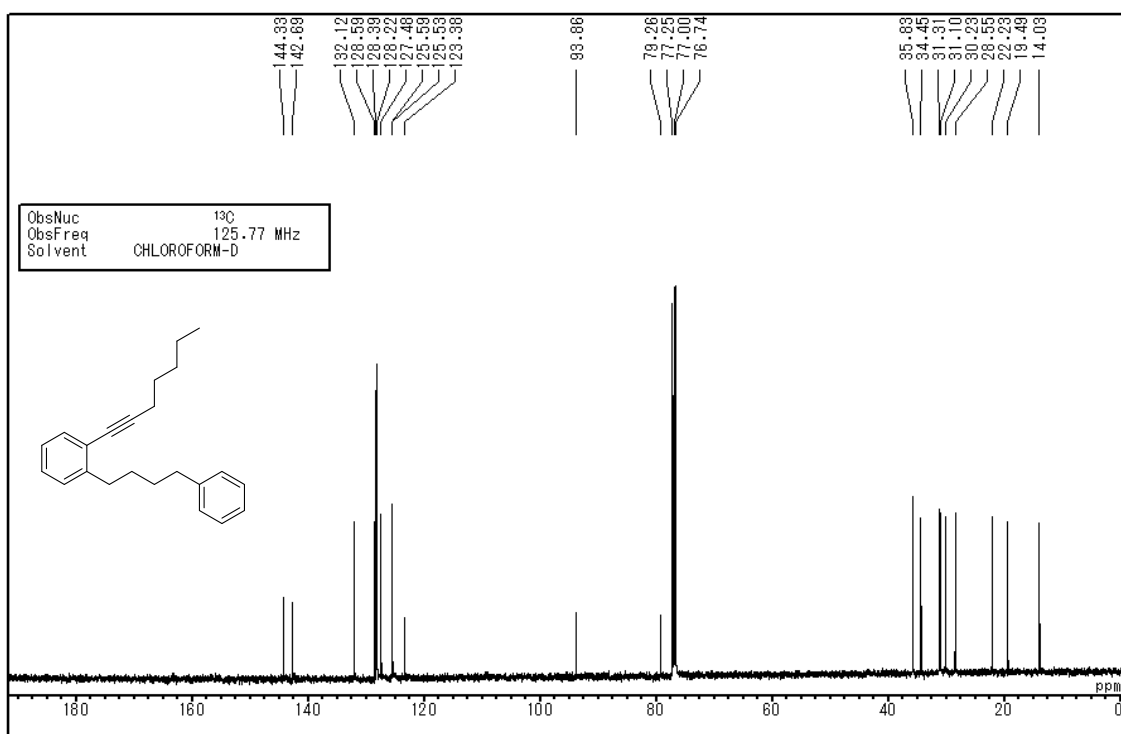

**2-(3,3-Dimethylbut-1-yn-1-yl)-4-methyl-1-(4-phenylbutyl)benzene (9d).**

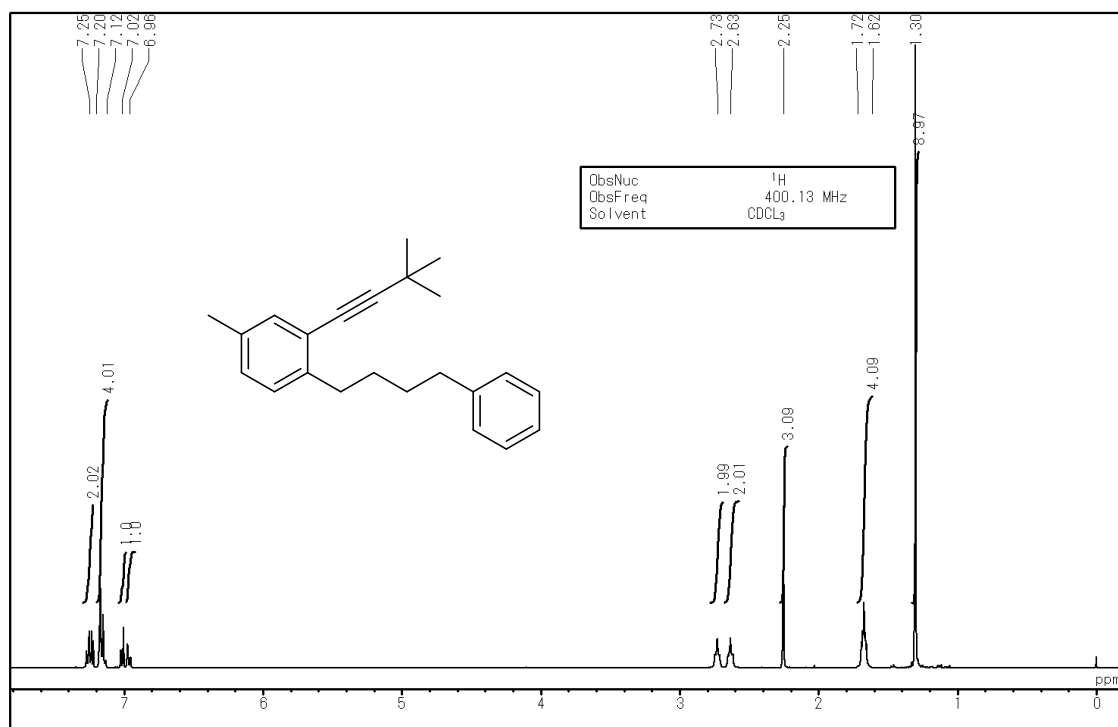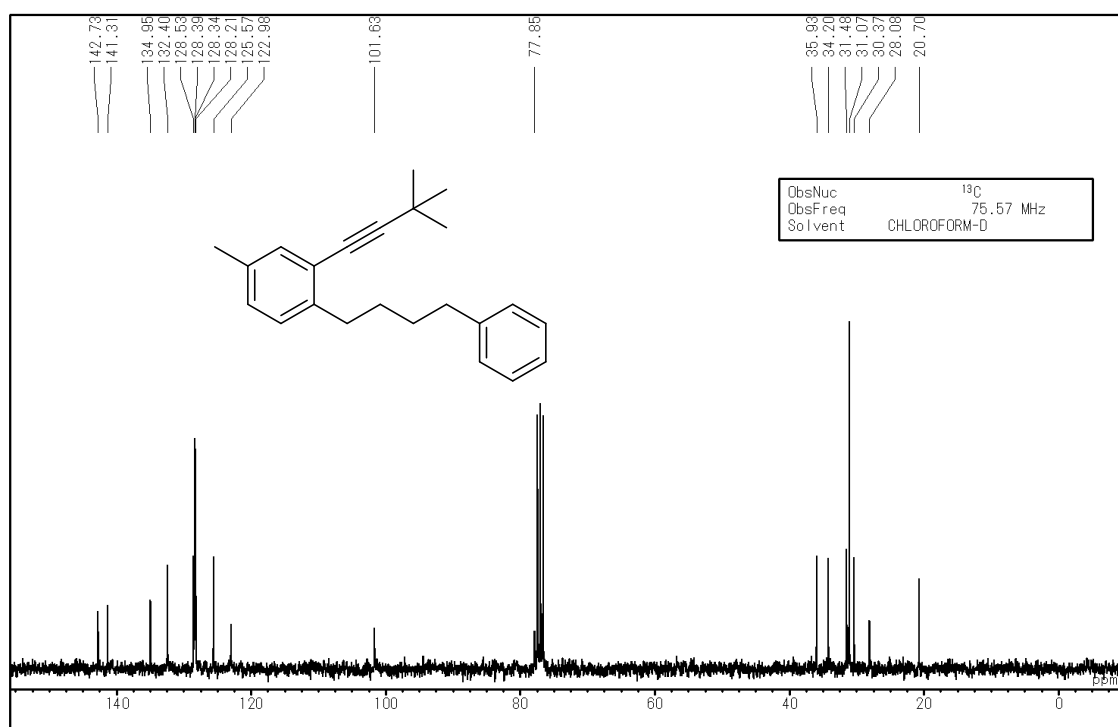

**4-Methyl-2-(pent-1-yn-1-yl)-1-(4-phenylbutyl)benzene (9e).**

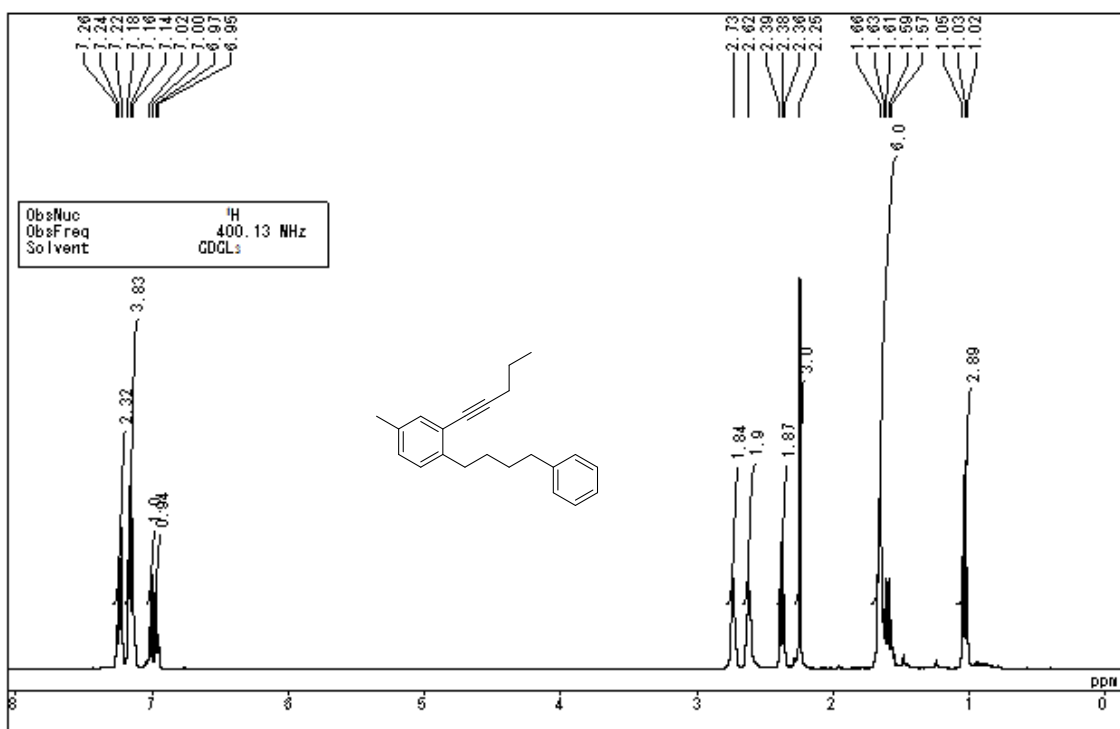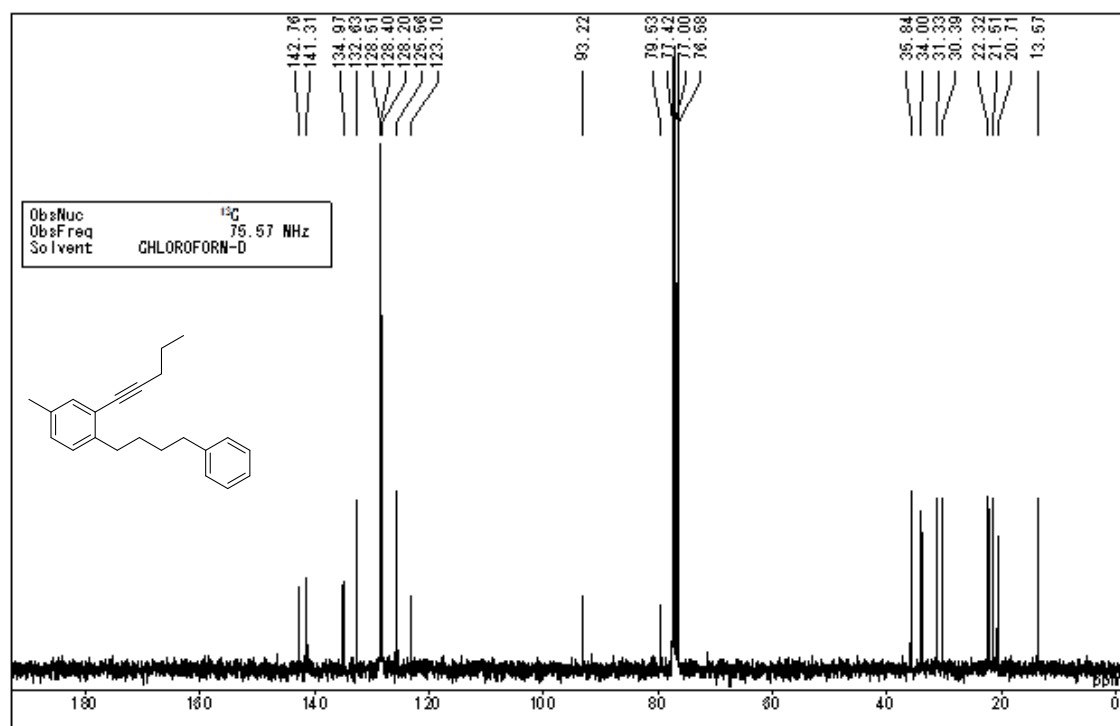



**1-(3,3-Dimethylbut-1-yn-1-yl)-4-methyl-2-(4-phenylbutyl)benzene (9f).**

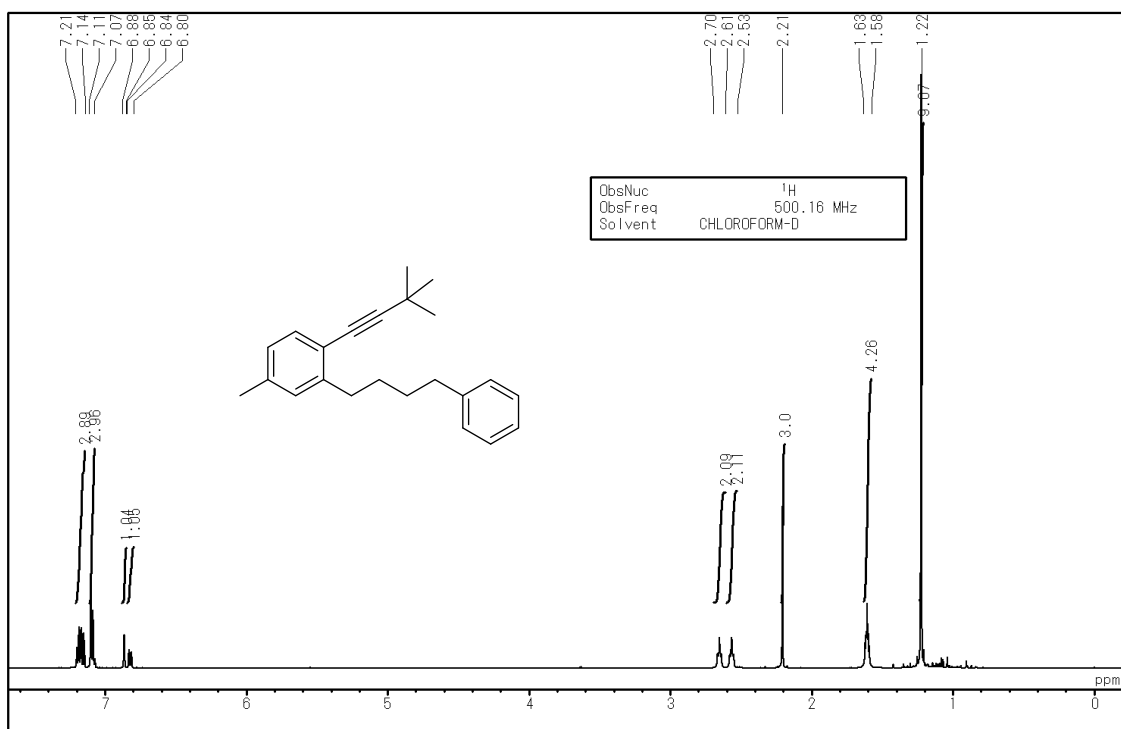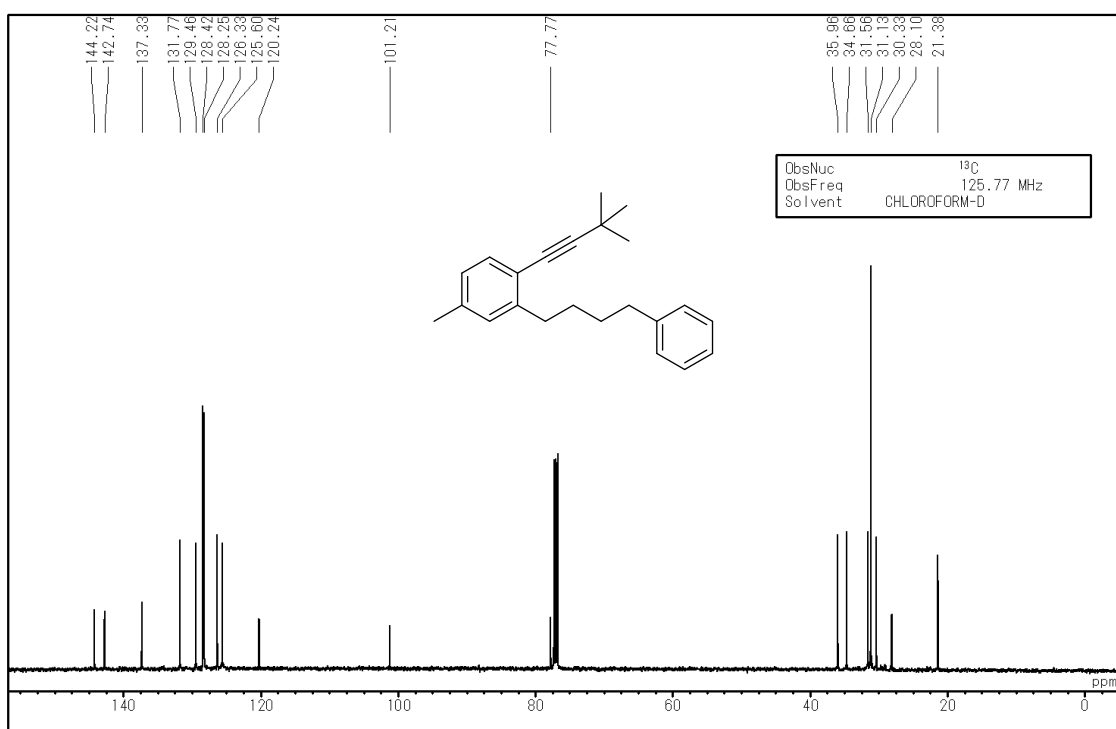

**4-Methyl-1-(pent-1-yn-1-yl)-2-(4-phenylbutyl)benzene (9g).**

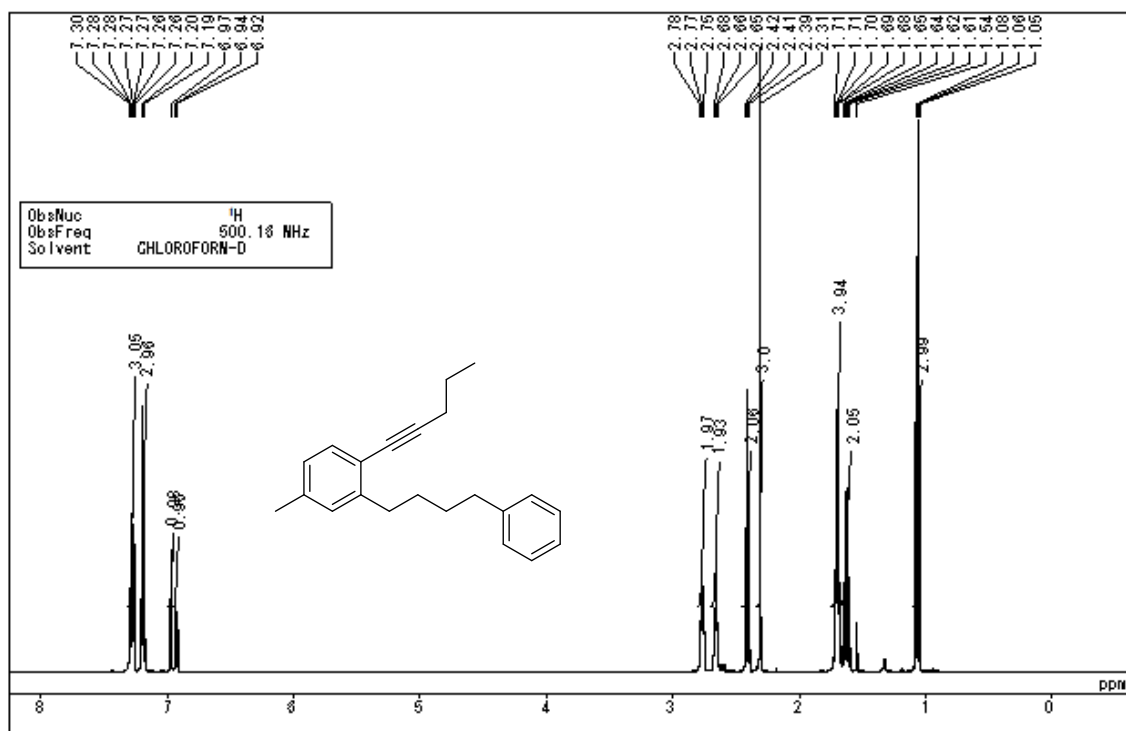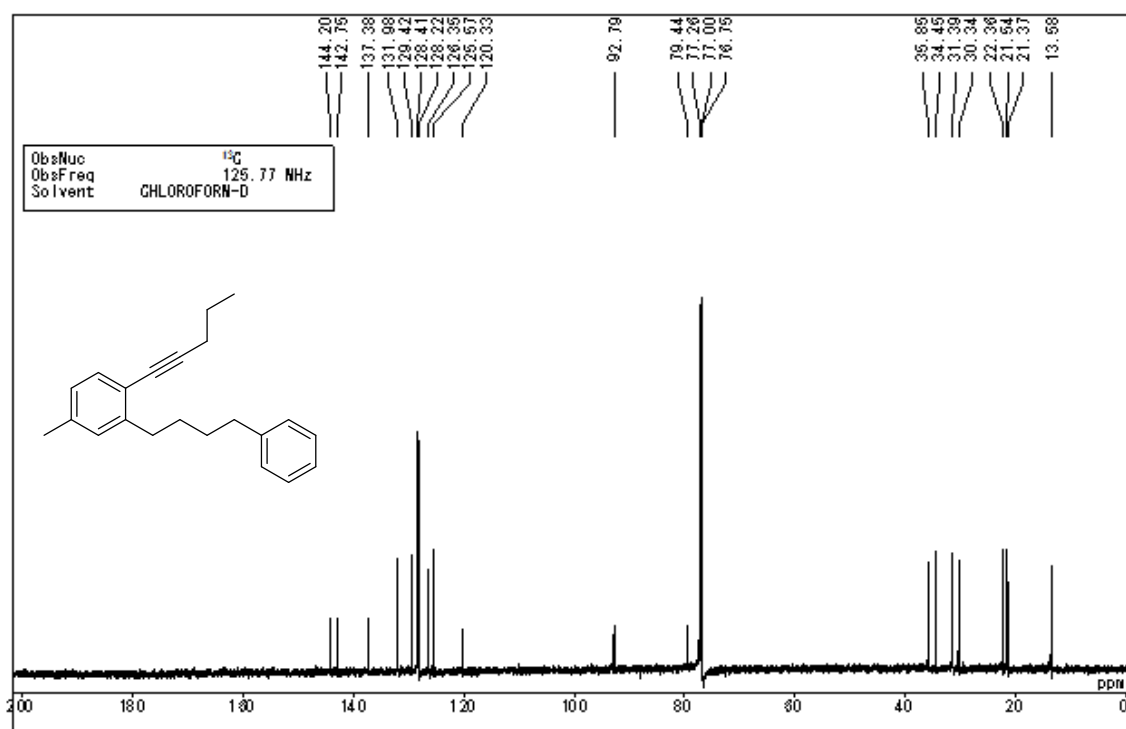

**(Z)-12-(2,2-Dimethylpropylidene)-2-methoxy-3-((Z)-1-(5-methoxy-2-(3-phenyl-propyl)phenyl)-3,3-dimethylbut-1-en-1-yl)-5,6,7,12-tetrahydrodibenzo[*a,d*]cyclo-octane (10).**

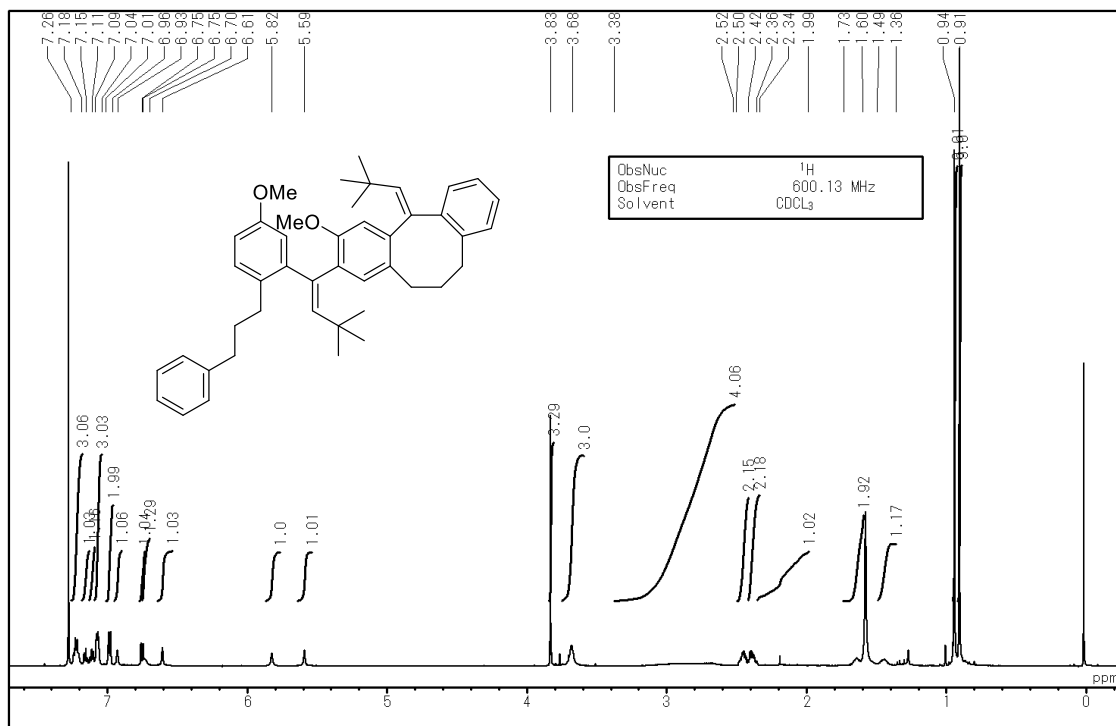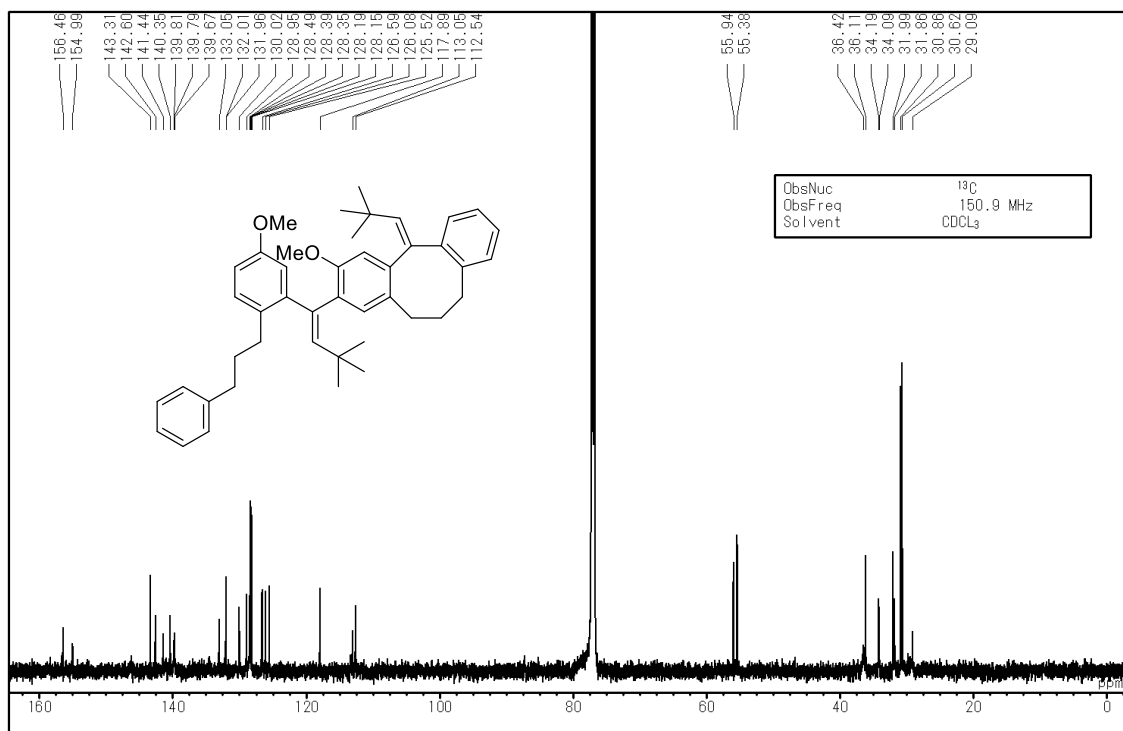

Supplement: c5cc01257k1.pdf [file c5cc01257k1.pdf]
